# Supplementary material for: Synthesis of β-ketophosphonates through aerobic copper(II)-mediated phosphorylation of enol acetates
Source: publisher site journal article supplement (doi:10.3762/bjoc.21.96), 2025-06-20
Supplement: Additional file 1 [file 1860-5397-21-96-S1.pdf]

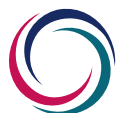

## Supporting Information

for

### Synthesis of $\beta$ -ketophosphonates through aerobic copper(II)-mediated phosphorylation of enol acetates

Alexander S. Budnikov, Igor B. Krylov, Fedor K. Monin, Valentina M. Merkulova,  
Alexey I. Ilovaisky, Liu Yan, Bing Yu and Alexander O. Terent'ev

*Beilstein J. Org. Chem.* **2025**, 21, 1192–1200. doi:10.3762/bjoc.21.96

### Experimental details, compound characterization data, and NMR spectra

## Table of contents

|                                                                                                |     |
|------------------------------------------------------------------------------------------------|-----|
| General .....                                                                                  | S3  |
| Experimental details and characterization data of synthesized compounds .....                  | S4  |
| References.....                                                                                | S13 |
| The $^1\text{H}$ , $^{13}\text{C}$ , and $^{31}\text{P}$ spectra of synthesized compounds..... | S14 |

## General

In all experiments rt stands for 22–25 °C.  $^1\text{H}$  and  $^{13}\text{C}$  NMR spectra were recorded on a Bruker AVANCE II 300, Bruker Fourier 300HD (300.13 MHz for  $^1\text{H}$ , 75.47 MHz for  $^{13}\text{C}$  and 121.49 MHz for  $^{31}\text{P}$ , respectively) and Bruker AVANCE II 600 (600.13 MHz for  $^1\text{H}$ , 150.92 MHz for  $^{13}\text{C}$ , 242.93 MHz for  $^{31}\text{P}$ ) spectrometers in  $\text{CDCl}_3$ . Chemical shifts were reported in parts per million (ppm), and the residual solvent peak was used as an internal reference:  $^1\text{H}$  ( $\text{CDCl}_3$   $\delta$  = 7.26 ppm),  $^{13}\text{C}$  ( $\text{CDCl}_3$   $\delta$  = 77.16 ppm). Multiplicity was indicated as follows: s (singlet), d (doublet), t (triplet), q (quartet), m (multiplet). Coupling constants were reported in Hertz (Hz).

FTIR spectra were recorded on Bruker Alpha instrument. High resolution mass spectra (HRMS) were measured on a Bruker maXis instrument using electrospray ionization (ESI). The measurements were performed in a positive ion mode (interface capillary voltage – 4500 V); mass range from  $m/z$  50 to  $m/z$  3000 Da; external calibration with Electrospray Calibrant Solution (Fluka). A syringe injection was used for all acetonitrile solutions (flow rate 3  $\mu\text{L}/\text{min}$ ). Nitrogen was applied as a dry gas; interface temperature was set at 180 °C.

Diisopropyl phosphite 98%, diethyl phosphite 98%, dimethyl phosphite 99%, dibutyl phosphite 98%, diphenyl phosphite 98%, diphenylphosphine oxide 97%, 2,2,6,6-tetramethylpiperidoxyl (TEMPO) 99%, 3,5-di-*tert*-butyl-4-hydroxytoluene (BHT) 99%, manganese(III) acetylacetonate 98%, copper(II) sulfate pentahydrate 98%, copper(II) sulfate 99%, copper(I) bromide 99%, copper(II) bromide 99%, copper(II) nitrate hemi(pentahydrate) 99%, copper(II) perchlorate hexahydrate 98%, copper(II) tetrafluoroborate hydrate 98%, copper(II) acetylacetonate 99%, iron(III) chloride 97%, copper(I) chloride 99%, copper(II) chloride 97%, copper(II) acetate 98%, copper(II) acetate monohydrate 98%, cobalt(II) sulfate heptahydrate 99%, cobalt(II) carbonate hydrate 99%, silver nitrate 99% were used as is from commercial sources. Acetonitrile and ethyl acetate were distilled over  $\text{P}_2\text{O}_5$  prior use. Toluene, DMSO, and DMF were distilled over  $\text{CaH}_2$  prior to use. Glacial acetic acid was used as is from commercial sources. Enol acetates **1a–n**, vinyl azide **4a**, and silyl enol ether **4b** were prepared according literature procedures<sup>1–6</sup>.

# Experimental details and characterization data of synthesized compounds

Optimization of the reaction conditions (additional experimental data for Table 1).

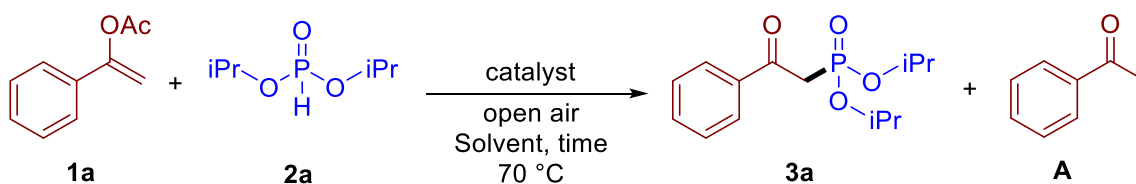

| Run             | Molar ratio <b>1a:2a</b> | catalyst, mol %                                            | Solvent                     | Time, h  | Yield %, <sup>a</sup> <b>3a</b> | Yield %, <sup>a</sup> <b>A</b> |
|-----------------|--------------------------|------------------------------------------------------------|-----------------------------|----------|---------------------------------|--------------------------------|
| 1               | 1:4                      | CuSO <sub>4</sub> •5H <sub>2</sub> O, 20                   | MeCN                        | 10       | 62                              | 7                              |
| 2               | 1:1.5                    | CuSO <sub>4</sub> •5H <sub>2</sub> O, 20                   | MeCN                        | 10       | 56                              | 8                              |
| 3               | 1:1.5                    | CuSO <sub>4</sub> •5H <sub>2</sub> O, 20                   | MeCN                        | 6        | 52                              | 4                              |
| 4               | 1:2                      | CuSO <sub>4</sub> •5H <sub>2</sub> O, 20                   | MeCN                        | 6        | 71                              | 10                             |
| 5               | 1:2                      | none                                                       | MeCN                        | 6        | n.d.                            | n.d.                           |
| 6               | 1:2                      | CuBr, 20                                                   | MeCN                        | 6        | 13                              | 9                              |
| 7               | 1:2                      | CuBr <sub>2</sub> , 20                                     | MeCN                        | 6        | n.d.                            | 81                             |
| 8               | 1:2                      | CuCl, 20                                                   | MeCN                        | 6        | n.d.                            | 7                              |
| 9               | 1:2                      | CuCl <sub>2</sub> , 20                                     | MeCN                        | 6        | n.d.                            | 81                             |
| 10              | 1:2                      | Cu(NO <sub>3</sub> ) <sub>2</sub> •2.5H <sub>2</sub> O, 20 | MeCN                        | 6        | 25                              | <5                             |
| 11              | 1:2                      | Cu(ClO <sub>4</sub> ) <sub>2</sub> •6H <sub>2</sub> O, 20  | MeCN                        | 6        | 23                              | 34                             |
| 12              | 1:2                      | Cu(BF <sub>4</sub> ) <sub>2</sub> •xH <sub>2</sub> O, 20   | MeCN                        | 6        | 39                              | 25                             |
| 13              | 1:2                      | CuSO <sub>4</sub> , 20                                     | MeCN                        | 6        | <5                              | <5                             |
| 14              | 1:2                      | Cu(acac) <sub>2</sub> , 20                                 | MeCN                        | 6        | n.d.                            | 7                              |
| 15              | 1:2                      | Cu(OAc) <sub>2</sub> , 20                                  | MeCN                        | 6        | <5                              | <5                             |
| 16              | 1:2                      | Cu(OAc) <sub>2</sub> •H <sub>2</sub> O, 20                 | MeCN                        | 6        | <5                              | <5                             |
| 17              | 1:2                      | CoSO <sub>4</sub> , 20                                     | MeCN                        | 6        | n.d.                            | 5                              |
| 18              | 1:2                      | CoCO <sub>3</sub> , 20                                     | MeCN                        | 6        | n.d.                            | 4                              |
| 19              | 1:2                      | Mn(acac) <sub>3</sub> , 20                                 | MeCN                        | 6        | 7                               | 7                              |
| 20              | 1:2                      | AgNO <sub>3</sub> , 20                                     | MeCN                        | 6        | 11                              | <5                             |
| 21              | 1:2                      | FeCl <sub>3</sub> , 20                                     | MeCN                        | 6        | n.d.                            | 74                             |
| 22              | 1:2                      | CuSO <sub>4</sub> •5H <sub>2</sub> O, 20                   | DMF                         | 6        | <5                              | <5                             |
| 23              | 1:2                      | CuSO <sub>4</sub> •5H <sub>2</sub> O, 20                   | AcOH                        | 6        | n.d.                            | 12                             |
| 24              | 1:2                      | CuSO <sub>4</sub> •5H <sub>2</sub> O, 20                   | DMSO                        | 6        | <5                              | <5                             |
| 25              | 1:2                      | CuSO <sub>4</sub> •5H <sub>2</sub> O, 20                   | Toluene                     | 6        | <5                              | <5                             |
| 26              | 1:2                      | CuSO <sub>4</sub> •5H <sub>2</sub> O, 20                   | EtOH                        | 6        | <5                              | <5                             |
| 27              | 1:2                      | CuSO <sub>4</sub> •5H <sub>2</sub> O, 20                   | MeCN/H <sub>2</sub> O = 4/1 | 3        | 32                              | 6                              |
| <b>28</b>       | <b>1:2</b>               | <b>CuSO<sub>4</sub>•5H<sub>2</sub>O, 20</b>                | <b>MeCN</b>                 | <b>3</b> | <b>70 (68)</b>                  | <b>&lt;5</b>                   |
| 29              | 1:2                      | CuSO <sub>4</sub> •5H <sub>2</sub> O, 20                   | MeCN                        | 1        | 36                              | <5                             |
| 30 <sup>b</sup> | 1:2                      | CuSO <sub>4</sub> •5H <sub>2</sub> O, 20                   | MeCN                        | 24       | 9                               | 5                              |
| 31              | 1:2                      | CuSO <sub>4</sub> •5H <sub>2</sub> O, 10                   | MeCN                        | 3        | 64                              | <5                             |
| 32              | 1:2                      | CuSO <sub>4</sub> •5H <sub>2</sub> O, 5                    | MeCN                        | 3        | 56                              | <5                             |
| 33              | 1:2                      | CuSO <sub>4</sub> •5H <sub>2</sub> O, 1                    | MeCN                        | 12       | 24                              | <5                             |
| 34 <sup>c</sup> | 1:2                      | CuSO <sub>4</sub> •5H <sub>2</sub> O, 20                   | MeCN                        | 3        | 71                              | <5                             |

<sup>a</sup>Yields were determined by <sup>1</sup>H NMR using 1,1,2,2-tetrachloroethane as an internal standard. The yields for the isolated products are given in parenthesis. <sup>b</sup>rt. <sup>c</sup>Finely powdered CuSO<sub>4</sub>•5H<sub>2</sub>O.

Enol acetate **1a** (0.5 mmol, 81 mg), diisopropyl phosphite (**2a**, 0.5–2 mmol, 83–332 mg), catalyst (0–20 mol %, 0–37 mg), and a solvent (5 mL) were sequentially added to a round-bottom

flask. The reaction mixture was stirred for 3 hours at 70 °C under air (unless otherwise stated), cooled to room temperature, and rotary-evaporated under reduced pressure. The yields of **3a** were determined by  $^1\text{H}$  NMR spectroscopy using 1,1,2,2-tetrachloroethane as an internal standard. In the run 28 **3a** was isolated by column chromatography on silica gel using  $\text{CHCl}_3/\text{MeOH} = 60:1$  mixture as an eluent.

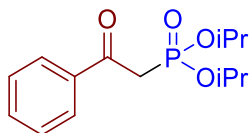

**Diisopropyl (2-oxo-2-phenylethyl)phosphonate (3a)** was synthesized as yellow oil (68%, isolated by column chromatography using  $\text{CHCl}_3/\text{MeOH} = 60/1$  as an eluent).<sup>5</sup>  $^1\text{H}$  NMR (300.13 MHz,  $\text{CDCl}_3$ ):  $\delta = 8.04 - 7.94$  (m, 2H),  $7.60 - 7.50$  (m, 1H),  $7.49 - 7.39$  (m, 2H),  $4.88 - 4.52$  (m, 2H),  $3.57$  (d,  $J = 22.9$  Hz, 2H),  $1.26$  (d,  $J = 2.2$  Hz, 6H),  $1.24$  (d,  $J = 2.2$  Hz, 6H).  $^{13}\text{C}$  NMR (75.48 MHz,  $\text{CDCl}_3$ ):  $\delta = 192.2$  (d,  $J = 6.7$  Hz),  $136.8$ ,  $133.6$ ,  $129.2$ ,  $128.6$ ,  $71.6$  (d,  $J = 6.5$  Hz),  $39.9$  (d,  $J = 130.2$  Hz),  $24.0$  (d,  $J = 3.6$  Hz),  $23.8$  (d,  $J = 5.0$  Hz).  $^{31}\text{P}$  (121.49 MHz,  $\text{CDCl}_3$ ):  $\delta = 18.6$ .

**General reaction conditions for copper(II)-mediated phosphorylation of enolacetates (experimental data for Scheme 2).**

Enol acetate **1** (0.5 mmol, 81–121 mg), phosphite **2** (1.0 mmol, 110–234 mg),  $\text{CuSO}_4 \cdot 5\text{H}_2\text{O}$  (0.1 mmol, 25 mg), and MeCN (5 mL) were sequentially added to a round-bottom flask. The reaction mixture (suspension) was stirred for 3 hours at 70 °C under air (air condenser) and then cooled to room temperature, and rotary-evaporated under reduced pressure. An additional evaporation step using a rotary vane pump (0.5 mmHg) at 80 °C was made for the evaporation of phosphite excess. The residue was isolated by column chromatography on silica gel (eluent is given for each product, see below).

$^1\text{H}$ ,  $^{13}\text{C}$ , and  $^{31}\text{P}$  NMR spectra of the synthesized compounds **3a–c,g–l,m** were in agreement with the literature data.<sup>1,5,6</sup>

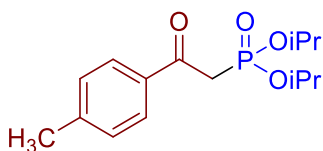

**Diisopropyl (2-oxo-2-(p-tolyl)ethyl)phosphonate (3b)** was synthesized as yellow oil (71%, isolated by column chromatography using  $\text{CHCl}_3/\text{MeOH} = 60/1$  as an eluent).<sup>5</sup>  $^1\text{H}$  NMR (300.13 MHz,  $\text{CDCl}_3$ ):  $\delta = 7.91$  (d,  $J = 8.2$  Hz, 2H),  $7.25$  (d,  $J = 8.2$  Hz, 2H),  $4.87 - 4.55$  (m, 2H),  $3.55$  (d,  $J = 22.9$  Hz, 2H),  $2.40$  (s, 3H),  $1.28$  (d,  $J = 2.7$  Hz, 6H),  $1.26$  (d,  $J = 2.7$  Hz, 6H).  $^{13}\text{C}$  NMR (75.47 MHz,  $\text{CDCl}_3$ ):  $\delta = 191.8$  (d,  $J = 6.7$  Hz),  $144.6$ ,  $134.4$  (d,  $J = 1.7$  Hz),  $129.4$ ,  $129.3$ ,  $71.5$  (d,  $J =$

6.7 Hz), 39.8 (d,  $J = 130.4$  Hz), 24.1 (d,  $J = 3.8$  Hz), 23.9 (d,  $J = 5.2$  Hz), 21.8.  $^{31}\text{P}$  (121.49 MHz,  $\text{CDCl}_3$ ):  $\delta = 18.0$ .

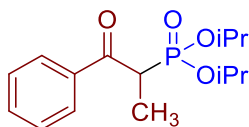

**Diisopropyl (1-oxo-1-phenylpropan-2-yl)phosphonate (3c)** was synthesized as pale yellow oil (34%, isolated by column chromatography using  $\text{DCM}/\text{EA} = 3/1$  as an eluent).<sup>5</sup>  $^1\text{H}$  NMR (300.13 MHz,  $\text{CDCl}_3$ ):  $\delta = 8.09 - 7.95$  (m, 2H), 7.62 – 7.50 (m, 1H), 7.49 – 7.40 (m, 2H), 4.82 – 4.51 (m, 2H), 4.11 (dq,  $J = 23.6, 7.0$  Hz, 1H), 1.50 (dd,  $J = 18.0, 7.0$  Hz, 3H), 1.29 (d,  $J = 6.2$  Hz, 3H), 1.25 (d,  $J = 6.2$  Hz, 3H), 1.22 (d,  $J = 6.2$  Hz, 3H), 1.17 (d,  $J = 6.2$  Hz, 3H).  $^{13}\text{C}$  NMR (75.50 MHz,  $\text{CDCl}_3$ ):  $\delta = 196.8$  (d,  $J = 4.9$  Hz), 137.2, 133.3, 129.0, 128.5, 71.5 (d,  $J = 2.2$  Hz), 71.4 (d,  $J = 2.2$  Hz), 42.0 (d,  $J = 131.2$  Hz), 24.2 (d,  $J = 3.5$  Hz), 24.1 (d,  $J = 3.5$  Hz), 23.8 (d,  $J = 5.2$  Hz), 12.3 (d,  $J = 6.5$  Hz).  $^{31}\text{P}$  (121.54 MHz,  $\text{CDCl}_3$ ):  $\delta = 21.3$ .

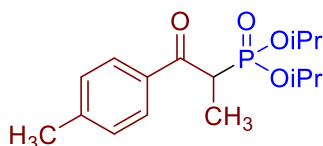

**Diisopropyl (1-oxo-1-(p-tolyl)propan-2-yl)phosphonate (3d)** was synthesized as pale yellow oil (35%, isolated by column chromatography using  $\text{CHCl}_3/\text{MeOH} = 60/1$  as an eluent).  $^1\text{H}$  NMR (300.23 MHz,  $\text{CDCl}_3$ ):  $\delta = 7.89$  (d,  $J = 8.2$  Hz, 2H), 7.24 (d,  $J = 8.2$  Hz, 2H), 4.81 – 4.53 (m, 2H), 4.08 (dq,  $J = 23.4, 7.0$  Hz, 1H), 2.39 (s, 3H), 1.48 (dd,  $J = 18.0, 7.0$  Hz, 3H), 1.29 (d,  $J = 6.2$  Hz, 3H), 1.26 (d,  $J = 6.2$  Hz, 3H), 1.23 (d,  $J = 6.2$  Hz, 3H), 1.18 (d,  $J = 6.2$  Hz, 3H).  $^{13}\text{C}$  NMR (75.50 MHz,  $\text{CDCl}_3$ ):  $\delta = 196.3$  (d,  $J = 4.8$  Hz), 144.1, 134.7 (d,  $J = 1.1$  Hz), 129.20, 129.19, 71.3 (d,  $J = 7.0$  Hz), 41.9 (d,  $J = 131.4$  Hz), 24.2 (d,  $J = 3.3$  Hz), 24.1 (d,  $J = 3.3$  Hz), 23.9 (d,  $J = 5.2$  Hz), 21.8, 12.4 (d,  $J = 6.4$  Hz).  $^{31}\text{P}$  (121.54 MHz,  $\text{CDCl}_3$ ):  $\delta = 21.6$ . **FT-IR** (thin layer):  $\nu_{\text{max}} = 2980, 2937, 1679, 1607, 1454, 1384, 1324, 1301, 1251, 1181, 1107, 987, 944, 786$ . **HR-MS** (ESI):  $m/z = 335.1383$ , calc. for  $\text{C}_{16}\text{H}_{25}\text{O}_4\text{P} + \text{Na}^+$ : 335.1382.

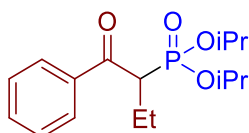

**Diisopropyl (1-oxo-1-phenylbutan-2-yl)phosphonate (3e)** was synthesized as pale yellow oil (31%, isolated by column chromatography using  $\text{DCM}/\text{EA} = 3/1$  with gradient elution to 1/1).  $^1\text{H}$  NMR (300.13 MHz,  $\text{CDCl}_3$ ):  $\delta = 8.05 - 7.93$  (m, 2H), 7.58 – 7.49 (m, 1H), 7.49 – 7.38 (m, 2H), 4.81 – 4.49 (m, 2H), 3.96 (ddd,  $J = 23.2, 10.5, 3.7$  Hz, 1H), 2.36 – 2.11 (m, 1H), 2.10 – 1.91 (m, 1H), 1.28 (d,  $J = 6.2$  Hz, 3H), 1.25 (d,  $J = 6.2$  Hz, 3H), 1.19 (d,  $J = 6.2$  Hz, 3H), 1.15 (d,  $J = 6.2$

Hz, 3H), 0.91 (t,  $J = 7.3$  Hz, 3H).  $^{13}\text{C}$  NMR (75.47 MHz,  $\text{CDCl}_3$ ):  $\delta = 196.7$  (d,  $J = 5.3$  Hz), 138.3, 133.2, 128.8, 128.5, 71.41 (d,  $J = 6.5$  Hz), 71.33 (d,  $J = 6.5$  Hz), 49.8 (d,  $J = 129.3$  Hz), 24.2 (d,  $J = 3.2$  Hz), 24.0 (d,  $J = 3.2$  Hz), 23.8 (d,  $J = 5.1$  Hz), 21.3 (d,  $J = 4.8$  Hz), 13.3 (d,  $J = 16.0$  Hz).  $^{31}\text{P}$  (121.54 MHz,  $\text{CDCl}_3$ ):  $\delta = 20.4$ . **HR-MS** (ESI):  $m/z = 313.1563$ , calc. for  $\text{C}_{16}\text{H}_{25}\text{O}_4\text{P}+\text{H}^+$ : 313.1563. **FT-IR** (thin layer):  $\nu_{\text{max}} = 2979, 2936, 1681, 1449, 1385, 1267, 1250, 1220, 1179, 1106, 1013, 986, 774, 691, 553$ .

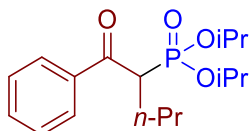

**Diisopropyl (1-oxo-1-phenylpentan-2-yl)phosphonate (3f)** was synthesized as yellow oil (31%, isolated by column chromatography using DCM/EA = 3/1 as an eluent).  $^1\text{H}$  NMR (300.13 MHz,  $\text{CDCl}_3$ ):  $\delta = 8.04 - 7.92$  (m, 2H), 7.59 – 7.50 (m, 1H), 7.50 – 7.39 (m, 2H), 4.82 – 4.51 (m, 2H), 4.06 (ddd,  $J = 23.5, 10.7, 3.5$  Hz, 1H), 2.35 – 2.07 (m, 1H), 2.02 – 1.77 (m, 1H), 1.41 – 1.31 (m, 2H), 1.29 (d,  $J = 6.2$  Hz, 3H), 1.26 (d,  $J = 6.2$  Hz, 3H), 1.20 (d,  $J = 6.2$  Hz, 3H), 1.15 (d,  $J = 6.2$  Hz, 3H), 0.87 (t,  $J = 7.3$  Hz, 3H).  $^{13}\text{C}$  NMR (75.47 MHz,  $\text{CDCl}_3$ ):  $\delta = 196.7$  (d,  $J = 5.3$  Hz), 138.20, 133.2, 128.8, 128.5, 71.46 (d,  $J = 7.6$  Hz), 71.35 (d,  $J = 7.6$  Hz), 47.9 (d,  $J = 129.3$  Hz), 29.8 (d,  $J = 5.0$  Hz), 24.2 (d,  $J = 3.5$  Hz), 24.1 (d,  $J = 3.5$  Hz), 23.8 (d,  $J = 5.4$  Hz), 22.0 (d,  $J = 15.5$  Hz), 14.0.  $^{31}\text{P}$  (121.49 MHz,  $\text{CDCl}_3$ ):  $\delta = 21.4$ . **HR-MS** (ESI):  $m/z = 344.1985$ , calc. for  $\text{C}_{17}\text{H}_{27}\text{O}_4\text{P}+\text{NH}_4^+$ : 344.1983. **FT-IR** (thin layer):  $\nu_{\text{max}} = 2978, 2934, 1681, 1449, 1385, 1250, 1209, 1178, 1107, 986, 771, 552$ .

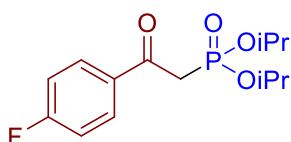

**Diisopropyl (2-(4-fluorophenyl)-2-oxoethyl)phosphonate (3g)** was synthesized as yellow oil (58%, isolated by column chromatography using  $\text{CHCl}_3/\text{MeOH} = 60/1$  as an eluent).<sup>5</sup>  $^1\text{H}$  NMR (300.13 MHz,  $\text{CDCl}_3$ ):  $\delta = 8.13 - 7.93$  (m, 2H), 7.19–7.01 (m, 2H), 4.79–4.56 (m, 2H), 3.53 (d,  $J = 22.9$  Hz, 2H), 1.26 (d,  $J = 1.9$  Hz, 6H), 1.24 (d,  $J = 1.9$  Hz, 6H).  $^{13}\text{C}$  NMR (75.470 MHz,  $\text{CDCl}_3$ ):  $\delta = 190.5$  (d,  $J = 6.5$  Hz), 166.1 (d,  $J = 255.7$  Hz), 133.2 (d,  $J = 2.5$  Hz), 132.0 (d,  $J = 9.5$  Hz), 115.7 (d,  $J = 22.0$  Hz), 71.7 (d,  $J = 6.6$  Hz), 40.0 (d,  $J = 129.7$  Hz), 24.0 (d,  $J = 3.7$  Hz), 23.8 (d,  $J = 5.0$  Hz).  $^{31}\text{P}$  (121.54 MHz,  $\text{CDCl}_3$ ):  $\delta = 17.5$ .

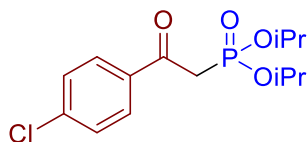

**Diisopropyl (2-(4-chlorophenyl)-2-oxoethyl)phosphonate (3h)** was synthesized as yellow oil (65%, isolated by column chromatography using  $\text{CHCl}_3/\text{MeOH} = 80/1$  with gradient elution to 60/1).<sup>5</sup>  **$^1\text{H}$  NMR** (300.13 MHz,  $\text{CDCl}_3$ ):  $\delta = 7.96$  (d,  $J = 8.6$  Hz, 2H),  $7.43$  (d,  $J = 8.6$  Hz, 2H),  $4.82 - 4.59$  (m, 2H),  $3.54$  (d,  $J = 23.0$  Hz, 2H),  $1.27$  (d,  $J = 1.5$  Hz, 6H),  $1.25$  (d,  $J = 1.5$  Hz, 6H).  **$^{13}\text{C}$  NMR** (75.47 MHz,  $\text{CDCl}_3$ ):  $\delta = 191.0$  (d,  $J = 6.7$  Hz),  $140.2$ ,  $135.1$ ,  $130.7$ ,  $128.9$ ,  $71.7$  (d,  $J = 6.7$  Hz),  $40.1$  (d,  $J = 129.5$  Hz),  $24.1$  (d,  $J = 3.9$  Hz),  $23.9$  (d,  $J = 5.0$  Hz).  **$^{31}\text{P}$**  (121.49 MHz,  $\text{CDCl}_3$ ):  $\delta = 18.1$ .

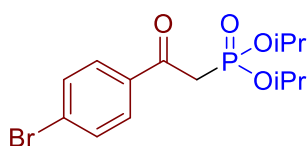

**Diisopropyl (2-(4-bromophenyl)-2-oxoethyl)phosphonate (3i)** was synthesized as pale yellow oil (80%, isolated by column chromatography using  $\text{DCM}/\text{EA} = 3/1$  as an eluent).<sup>5</sup>  **$^1\text{H}$  NMR** (300.13 MHz,  $\text{CDCl}_3$ ):  $\delta = 7.88$  (d,  $J = 8.6$  Hz, 2H),  $7.59$  (d,  $J = 8.6$  Hz, 2H),  $4.83 - 4.60$  (m, 2H),  $3.53$  (d,  $J = 23.0$  Hz, 2H),  $1.27$  (d,  $J = 1.6$  Hz, 6H),  $1.25$  (d,  $J = 1.6$  Hz, 6H).  **$^{13}\text{C}$  NMR** (75.47 MHz,  $\text{CDCl}_3$ ):  $\delta = 191.2$  (d,  $J = 6.6$  Hz),  $135.5$ ,  $131.9$ ,  $130.8$ ,  $129.0$ ,  $71.7$  (d,  $J = 6.6$  Hz),  $40.1$  (d,  $J = 129.4$  Hz),  $24.1$  (d,  $J = 3.6$  Hz),  $23.9$  (d,  $J = 4.9$  Hz).  **$^{31}\text{P}$**  (121.54 MHz,  $\text{CDCl}_3$ ):  $\delta = 17.2$ .

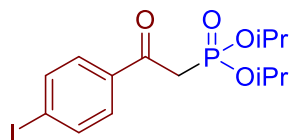

**Diisopropyl (2-(4-iodophenyl)-2-oxoethyl)phosphonate (3j)** was synthesized as yellow oil (40%, isolated by column chromatography using  $\text{CHCl}_3/\text{MeOH} = 60/1$  as an eluent).  **$^1\text{H}$  NMR** (300.13 MHz,  $\text{CDCl}_3$ ):  $\delta = 7.82$  (d,  $J = 8.6$  Hz, 2H),  $7.71$  (d,  $J = 8.6$  Hz, 2H),  $4.83 - 4.55$  (m, 2H),  $3.52$  (d,  $J = 23.0$  Hz, 2H),  $1.27$  (d,  $J = 1.8$  Hz, 6H),  $1.25$  (d,  $J = 1.8$  Hz, 6H).  **$^{13}\text{C}$  NMR** (75.47 MHz,  $\text{CDCl}_3$ ):  $\delta = 191.5$  (d,  $J = 6.7$  Hz),  $137.9$ ,  $136.0$  (d,  $J = 1.4$  Hz),  $130.6$ ,  $101.9$ ,  $71.7$  (d,  $J = 6.7$  Hz),  $39.9$  (d,  $J = 129.5$  Hz),  $24.1$  (d,  $J = 3.9$  Hz),  $23.9$  (d,  $J = 5.2$  Hz).  **$^{31}\text{P}$**  (121.54 MHz,  $\text{CDCl}_3$ ):  $\delta = 17.2$ . **HR-MS** (ESI):  $m/z = 433.0036$ , calc. for  $\text{C}_{14}\text{H}_{20}\text{IO}_4\text{P} + \text{Na}^+$ : 433.0038. **FT-IR** (thin layer):  $\nu_{\text{max}} = 2928, 1727, 1678, 1646, 1581, 1563, 1384, 1270, 1182, 988, 802, 741, 703$ .



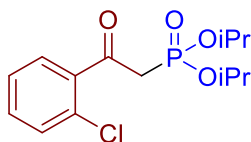

**Diisopropyl (2-(2-chlorophenyl)-2-oxoethyl)phosphonate (3k)** was synthesized as pale yellow oil (60%, isolated by column chromatography using CHCl<sub>3</sub>/MeOH = 60/1 as an eluent). **<sup>1</sup>H NMR** (300.23 MHz, CDCl<sub>3</sub>): δ = 7.59 – 7.52 (m, 1H), 7.43 – 7.37 (m, 2H), 7.36 – 7.27 (m, 1H), 4.84 – 4.55 (m, 2H), 3.66 (d, *J* = 22.5 Hz, 2H), 1.25 (d, *J* = 3.3 Hz, 6H), 1.23 (d, *J* = 3.3 Hz, 6H). **<sup>13</sup>C NMR** (75.50 MHz, CDCl<sub>3</sub>): δ = 194.7 (d, *J* = 7.0 Hz), 139.0, 132.2, 131.2, 130.5, 130.2, 127.0, 71.6 (d, *J* = 6.7 Hz), 43.6 (d, *J* = 128.7 Hz), 24.0 (d, *J* = 3.9 Hz), 23.8 (d, *J* = 5.1 Hz). **<sup>31</sup>P** (121.54 MHz, CDCl<sub>3</sub>): δ = 16.9. **HR-MS** (ESI): *m/z* = 357.0419, calc. for C<sub>14</sub>H<sub>20</sub>ClO<sub>4</sub>P+K<sup>+</sup>: 357.0416. **FT-IR** (thin layer): ν<sub>max</sub> = 2981, 2932, 1698, 1590, 1435, 1385, 1287, 1258, 1180, 1106, 1018, 989, 777, 760, 737.

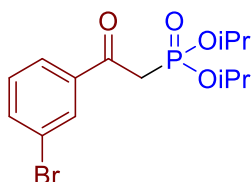

**Diisopropyl (2-(3-bromophenyl)-2-oxoethyl)phosphonate (3l)** was synthesized as yellow oil (79%, isolated by column chromatography using CHCl<sub>3</sub>/MeOH = 60/1 as an eluent). **<sup>1</sup>H NMR** (300.13 MHz, CDCl<sub>3</sub>): δ = 8.14 (t, *J* = 1.9 Hz, 1H), 7.94 (dt, *J* = 8.0, 1.4 Hz, 1H), 7.69 (dt, *J* = 8.0, 1.4 Hz, 1H), 7.34 (t, *J* = 8.0 Hz, 1H), 4.83 – 4.60 (m, 2H), 3.55 (d, *J* = 23.0 Hz, 2H), 1.28 (d, *J* = 2.2 Hz, 6H), 1.26 (d, *J* = 2.2 Hz, 6H). **<sup>13</sup>C NMR** (75.47 MHz, CDCl<sub>3</sub>): δ = 190.9 (d, *J* = 6.8 Hz), 138.4 (d, *J* = 1.2 Hz), 136.4, 132.3, 130.2, 127.9, 122.9, 71.8 (d, *J* = 6.8 Hz), 40.1 (d, *J* = 129.6 Hz), 24.1 (d, *J* = 3.9 Hz), 23.9 (d, *J* = 5.2 Hz). **<sup>31</sup>P** (121.54 MHz, CDCl<sub>3</sub>): δ = 16.9. **HR-MS** (ESI): *m/z* = 380.0621, 382.0601, calc. for C<sub>14</sub>H<sub>20</sub>BrO<sub>4</sub>P+NH<sub>4</sub><sup>+</sup>: 380.0628, 382.0615. **FT-IR** (thin layer): ν<sub>max</sub> = 2980, 2933, 1686, 1566, 1385, 1255, 1199, 1179, 1141, 1106, 987, 888, 792, 782, 590.

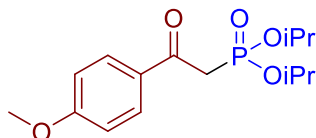

**Diisopropyl (2-(4-methoxyphenyl)-2-oxoethyl)phosphonate (3m)** was synthesized as yellow oil (56%, isolated by column chromatography using CHCl<sub>3</sub>/MeOH = 60/1 as an eluent). **<sup>1</sup>H NMR** (300.23 MHz, CDCl<sub>3</sub>): δ = 8.00 (d, *J* = 8.9 Hz, 2H), 6.93 (d, *J* = 8.9 Hz, 2H), 4.85 – 4.58 (m, 2H), 3.87 (s, 3H), 3.53 (d, *J* = 22.8 Hz, 2H), 1.28 (d, *J* = 2.7 Hz, 6H), 1.26 (d, *J* = 2.7 Hz, 6H). **<sup>13</sup>C NMR** (75.50 MHz, CDCl<sub>3</sub>): δ = 190.6 (d, *J* = 6.6 Hz), 164.0, 131.7, 130.0 (d, *J* = 1.4 Hz), 113.8, 71.5 (d, *J* = 6.8 Hz), 55.6, 39.7 (d, *J* = 130.1 Hz), 24.1 (d, *J* = 3.9 Hz), 23.9 (d, *J* = 5.2 Hz). **<sup>31</sup>P** (121.54 MHz, CDCl<sub>3</sub>): δ = 18.2.

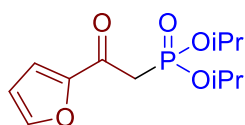

**Diisopropyl (2-(furan-2-yl)-2-oxoethyl)phosphonate (3n)** was synthesized as brown oil (19%, isolated by column chromatography using  $\text{CHCl}_3/\text{MeOH} = 60/1$  as an eluent).  **$^1\text{H}$  NMR** (300.13 MHz,  $\text{CDCl}_3$ ):  $\delta = 7.61$  (dd,  $J = 1.8, 0.8$  Hz, 1H), 7.29 (dd,  $J = 3.6, 0.8$  Hz, 1H), 6.55 (dd,  $J = 3.6, 1.7$  Hz, 1H), 4.85 – 4.59 (m, 2H), 3.45 (d,  $J = 22.7$  Hz, 2H), 1.29 (d,  $J = 1.6$  Hz, 6H), 1.27 (d,  $J = 1.6$  Hz, 6H).  **$^{13}\text{C}$  NMR** (75.47 MHz,  $\text{CDCl}_3$ ):  $\delta = 180.4$  (d,  $J = 7.1$  Hz), 152.5, 147.1, 119.0, 112.8, 71.7 (d,  $J = 6.6$  Hz), 39.6 (d,  $J = 130.5$  Hz), 24.1 (d,  $J = 3.9$  Hz), 23.9 (d,  $J = 5.2$  Hz).  **$^{31}\text{P}$**  (121.54 MHz,  $\text{CDCl}_3$ ):  $\delta = 17.3$ . **HR-MS** (ESI):  $m/z = 275.1043$ , calc. for  $\text{C}_{12}\text{H}_{21}\text{O}_4\text{P} + \text{H}^+$ : 275.1041. **FT-IR** (thin layer):  $\nu_{\text{max}} = 2980, 2930, 1674, 1568, 1467, 1387, 1301, 1254, 1208, 1178, 1142, 1106, 987, 886, 770$ .

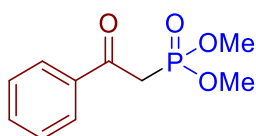

**Dimethyl (2-oxo-2-phenylethyl)phosphonate (3o)** was synthesized as yellow oil (28%, isolated by column chromatography using  $\text{DCM}/\text{MeOH} = 40/1$  as an eluent).<sup>6</sup>  **$^1\text{H}$  NMR** (300.23 MHz,  $\text{CDCl}_3$ ):  $\delta = 8.06 - 7.91$  (m, 2H), 7.64 – 7.53 (m, 1H), 7.52 – 7.39 (m, 2H), 3.76 (d,  $J = 11.2$  Hz, 6H), 3.62 (d,  $J = 22.6$  Hz, 2H).  **$^{13}\text{C}$  NMR** (75.50 MHz,  $\text{CDCl}_3$ ):  $\delta = 191.9$  (d,  $J = 6.6$  Hz), 136.5 (d,  $J = 2.5$  Hz), 133.9, 129.1, 128.8, 53.2 (d,  $J = 6.5$  Hz), 37.6 (d,  $J = 131.4$  Hz).  **$^{31}\text{P}$**  (121.54 MHz,  $\text{CDCl}_3$ ):  $\delta = 22.8$ .

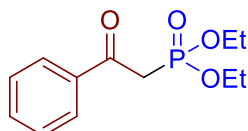

**Diethyl (2-oxo-2-phenylethyl)phosphonate (3p)** was synthesized as yellow oil (50%, isolated by column chromatography using  $\text{CHCl}_3/\text{MeOH} = 60/1$  as an eluent).<sup>5</sup>  **$^1\text{H}$  NMR** (300.13 MHz,  $\text{CDCl}_3$ ):  $\delta = 8.15 - 7.81$  (m, 2H), 7.70 – 7.52 (m, 1H), 7.51 – 7.31 (m, 2H), 4.31 – 3.93 (m, 4H), 3.62 (d,  $J = 22.7$  Hz, 2H), 1.26 (t,  $J = 7.1$  Hz, 6H).  **$^{13}\text{C}$  NMR** (75.50 MHz,  $\text{CDCl}_3$ ):  $\delta = 192.0$  (d,  $J = 6.7$  Hz), 136.6 (d,  $J = 1.8$  Hz), 133.8, 129.1, 128.7, 62.8 (d,  $J = 6.5$  Hz), 38.6 (d,  $J = 130.1$  Hz), 16.3 (d,  $J = 6.3$  Hz).  **$^{31}\text{P}$**  (121.54 MHz,  $\text{CDCl}_3$ ):  $\delta = 20.0$ .

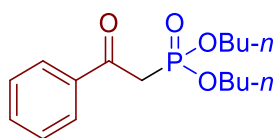

**Dibutyl (2-oxo-2-phenylethyl)phosphonate (3q)** was synthesized as yellow oil (63%, isolated by column chromatography using  $\text{CHCl}_3/\text{MeOH} = 60/1$  as an eluent).<sup>5</sup>  **$^1\text{H}$  NMR** (300.13 MHz,  $\text{CDCl}_3$ ):  $\delta = 8.09\text{--}7.88$  (m, 2H),  $7.65\text{--}7.52$  (m, 1H),  $7.51\text{--}7.34$  (m, 2H),  $4.15\text{--}3.91$  (m, 4H),  $3.61$  (d,  $J = 22.8$  Hz, 2H),  $1.69\text{--}1.45$  (m, 4H),  $1.42\text{--}1.15$  (m, 4H),  $0.86$  (t,  $J = 7.4$  Hz, 6H).  **$^{13}\text{C}$  NMR** (75.50 MHz,  $\text{CDCl}_3$ ):  $\delta = 192.0$  (d,  $J = 6.7$  Hz),  $136.6$  (d,  $J = 1.9$  Hz),  $133.7$ ,  $129.1$ ,  $128.6$ ,  $66.4$  (d,  $J = 6.8$  Hz),  $38.4$  (d,  $J = 129.5$  Hz),  $32.4$  (d,  $J = 6.3$  Hz),  $18.7$ ,  $13.6$ .  **$^{31}\text{P}$**  (121.49 MHz,  $\text{CDCl}_3$ ):  $\delta = 20.8$ .

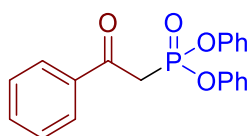

**Diphenyl (2-oxo-2-phenylethyl)phosphonate (3r)** was synthesized as yellow oil (26%, isolated by column chromatography using  $\text{CHCl}_3/\text{MeOH} = 60/1$  as an eluent).<sup>1</sup>  **$^1\text{H}$  NMR** (300.13 MHz,  $\text{CDCl}_3$ ):  $\delta = 8.05\text{--}7.92$  (m, 2H),  $7.61\text{--}7.49$  (m, 1H),  $7.47\text{--}7.37$  (m, 2H),  $7.31\text{--}7.18$  (m, 4H),  $7.17\text{--}7.01$  (m, 6H),  $3.88$  (d,  $J = 22.7$  Hz, 2H).  **$^{13}\text{C}$  NMR** (75.50 MHz,  $\text{CDCl}_3$ ):  $\delta = 190.8$  (d,  $J = 7.1$  Hz),  $150.1$  (d,  $J = 8.8$  Hz),  $136.4$  (d,  $J = 2.7$  Hz),  $134.0$ ,  $129.9$  (d,  $J = 1.1$  Hz),  $129.1$ ,  $128.8$ ,  $125.5$  (d,  $J = 1.4$  Hz),  $120.7$  (d,  $J = 4.5$  Hz),  $37.9$  (d,  $J = 133.4$  Hz).  **$^{31}\text{P}$**  (121.54 MHz,  $\text{CDCl}_3$ ):  $\delta = 13.2$ .

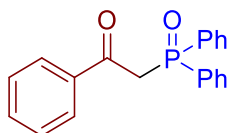

**2-(diphenylphosphoryl)-1-phenylethan-1-one (3s)** was synthesized as white solid (58%, isolated by column chromatography using  $\text{DCM}/\text{EA} = 5/1$  with gradient elution to  $1/1$ ).<sup>1</sup> Mp =  $134\text{--}135^\circ\text{C}$ .  **$^1\text{H}$  NMR** (600.13 MHz,  $\text{CDCl}_3$ ):  $\delta = 8.08\text{--}7.92$  (m, 2H),  $7.90\text{--}7.71$  (m, 4H),  $7.65\text{--}7.33$  (m, 9H),  $4.17$  (d,  $J = 15.1$  Hz, 2H).  **$^{13}\text{C}$  NMR** (75.50 MHz,  $\text{CDCl}_3$ ):  $\delta = 193.0$  (d,  $J = 5.5$  Hz),  $137.1$ ,  $133.7$ ,  $132.28$  (d,  $J = 2.8$  Hz),  $132.1$  (d,  $J = 103.3$  Hz),  $131.24$  (d,  $J = 9.8$  Hz),  $129.4$ ,  $128.8$ ,  $128.65$  (d,  $J = 1.0$  Hz),  $43.46$  (d,  $J = 57.9$  Hz).  **$^{31}\text{P}$**  (242.93 MHz,  $\text{CDCl}_3$ ):  $\delta = 29.3$ .

#### Gram-scale synthesis of 3a (experimental data for Scheme 3).

Enol acetate **1a** (6 mmol, 973 mg), diisopropyl phosphite (**2a**, 12 mmol, 1.994 g),  $\text{CuSO}_4 \cdot 5\text{H}_2\text{O}$  (1.2 mmol, 300 mg), and MeCN (30 mL) were sequentially added to a round-bottom flask. The reaction mixture was stirred for 12 hours at  $70^\circ\text{C}$  under air and then cooled to room temperature, and rotary-evaporated under reduced pressure. An additional evaporation step using a rotary

vane pump (0.5 mm Hg) at 80 °C was made for the evaporation of phosphite excess.  $\beta$ -ketophosphonate **3a** (1.31 g, 4.61 mmol, 77%) was isolated by column chromatography on silica gel on silica gel using  $\text{CHCl}_3/\text{MeOH} = 60/1$  as an eluent.

**Reaction of enolacetate 1a with diisopropyl phosphite (2a) at standard reaction conditions in the presence of radical scavengers (experimental data for Scheme 4, reaction 1).**

Enol acetate (0.5 mmol, 81 mg), diisopropyl phosphite (**2a**, 1.0 mmol, 166 mg),  $\text{CuSO}_4 \cdot 5\text{H}_2\text{O}$  (0.1 mmol, 25 mg), BHT (1.5 mmol, 330 mg) or TEMPO (1.5 mmol, 234 mg) and MeCN (5 mL) were sequentially added to a round-bottom flask. The reaction mixture was stirred for 3 hours at 70 °C under air and then cooled to room temperature, and rotary-evaporated under reduced pressure. The residue was analyzed using  $^1\text{H}$  and  $^{31}\text{P}$  NMR spectroscopy and HRMS.

**Reaction of enolacetate 1a with diisopropyl phosphite (2a) at standard reaction conditions under  $\text{O}_2$  or inert atmosphere (experimental data for Scheme 4, reaction 2b and 2c).**

Enol acetate (0.5 mmol, 81 mg), diisopropyl phosphite (**2a**, 1.0 mmol, 166 mg),  $\text{CuSO}_4 \cdot 5\text{H}_2\text{O}$  (0.1 mmol, 25 mg), and MeCN (5 mL) were sequentially added to a round-bottom flask. The flask was evacuated and backfilled with Ar or  $\text{O}_2$  (this procedure was repeated three times). The reaction mixture was stirred for 3 hours at 70 °C, cooled to room temperature, and rotary-evaporated under reduced pressure. The residue was analyzed using  $^1\text{H}$  and  $^{31}\text{P}$  NMR spectroscopy.

**Reaction of enolacetate 1a with diisopropyl phosphite (2a) with 10-fold excess of  $\text{CuSO}_4 \cdot 5\text{H}_2\text{O}$  under inert atmosphere (experimental data for Scheme 4, reaction 2d).**

Enol acetate (0.5 mmol, 81 mg), diisopropyl phosphite **2a** (1.0 mmol, 166 mg),  $\text{CuSO}_4 \cdot 5\text{H}_2\text{O}$  (1 mmol, 250 mg), and MeCN (5 mL) were sequentially added to a round-bottom flask. The flask was evacuated and backfilled with Ar (this procedure was repeated three times). The reaction mixture was stirred for 3 hours at 70 °C, cooled to room temperature, and rotary-evaporated under reduced pressure. The residue was analyzed using  $^1\text{H}$  and  $^{31}\text{P}$  NMR spectroscopy.

**Reaction of vinyl azide 4a or silyl enol ether 4b with diisopropyl phosphite (2a) at standard reaction conditions (experimental data for Scheme 4, reaction 3).**

Vinyl azide **4a** (0.5 mmol, 73 mg) or silyl enol ether **4b** (0.5 mmol, 96 mg), diisopropyl phosphite (**2a**, 1.0 mmol, 166 mg),  $\text{CuSO}_4 \cdot 5\text{H}_2\text{O}$  (1 mmol, 250 mg), and MeCN (5 mL) were sequentially added to a round-bottom flask. The flask was evacuated and backfilled with Ar (this procedure was repeated three times). The reaction mixture was stirred for 3 hours at 70 °C, cooled to room temperature, and rotary-evaporated under reduced pressure. The residue was analyzed using  $^1\text{H}$  and  $^{31}\text{P}$  NMR spectroscopy.

## References:

- (1) Chen, X.; Chen, X.; Li, X.; Qu, C.; Qu, L.; Bi, W.; Sun, K.; Zhao, Y. Acetonitrile-Dependent Oxyphosphorylation: A Mild One-Pot Synthesis of  $\beta$ -Ketophosphonates from Alkenyl Acids or Alkenes. *Tetrahedron* **2017**, 73 (17), 2439–2446. <https://doi.org/10.1016/j.tet.2017.03.026>.
- (2) Lu, Y.; Li, Y.; Zhang, R.; Jin, K.; Duan, C. Highly Efficient Cu(I)-Catalyzed Trifluoromethylation of Aryl(Heteroaryl) Enol Acetates with CF<sub>3</sub> Radicals Derived from CF<sub>3</sub>SO<sub>2</sub>Na and TBHP at Room Temperature. *J. Fluor. Chem.* **2014**, 161, 128–133. <https://doi.org/10.1016/j.jfluchem.2014.01.020>.
- (3) Paveliev, S. A.; Churakov, A. I.; Alimkhanova, L. S.; Segida, O. O.; Nikishin, G. I.; Terent'ev, A. O. Electrochemical Synthesis of O-Phthalimide Oximes from  $\alpha$ -Azido Styrenes via Radical Sequence: Generation, Addition and Recombination of Imide- N -Oxyl and Iminyl Radicals with C–O/N–O Bonds Formation. *Adv. Synth. Catal.* **2020**, 362 (18), 3864–3871. <https://doi.org/10.1002/adsc.202000618>.
- (4) Vil', V. A.; Gomes, G. D. P.; Ekimova, M. V.; Lyssenko, K. A.; Syroeshkin, M. A.; Nikishin, G. I.; Alabugin, I. V.; Terent'ev, A. O. Five Roads That Converge at the Cyclic Peroxy-Criegee Intermediates: BF<sub>3</sub> -Catalyzed Synthesis of  $\beta$ -Hydroperoxy- $\beta$ -Peroxylactones. *J. Org. Chem.* **2018**, 83 (21), 13427–13445. <https://doi.org/10.1021/acs.joc.8b02218>.
- (5) Wei, W.; Ji, J. Catalytic and Direct Oxyphosphorylation of Alkenes with Dioxygen and H-Phosphonates Leading to  $\beta$ -Ketophosphonates. *Angew. Chem.* **2011**, 123 (39), 9263–9265. <https://doi.org/10.1002/ange.201100219>.
- (6) Zhou, M.; Chen, M.; Zhou, Y.; Yang, K.; Su, J.; Du, J.; Song, Q.  $\beta$ -Ketophosphonate Formation via Aerobic Oxyphosphorylation of Alkynes or Alkynyl Carboxylic Acids with H-Phosphonates. *Org. Lett.* **2015**, 17 (7), 1786–1789. <https://doi.org/10.1021/acs.orglett.5b00574>.

## **The $^1\text{H}$ , $^{13}\text{C}$ , and $^{31}\text{P}$ spectra of synthesized compounds**

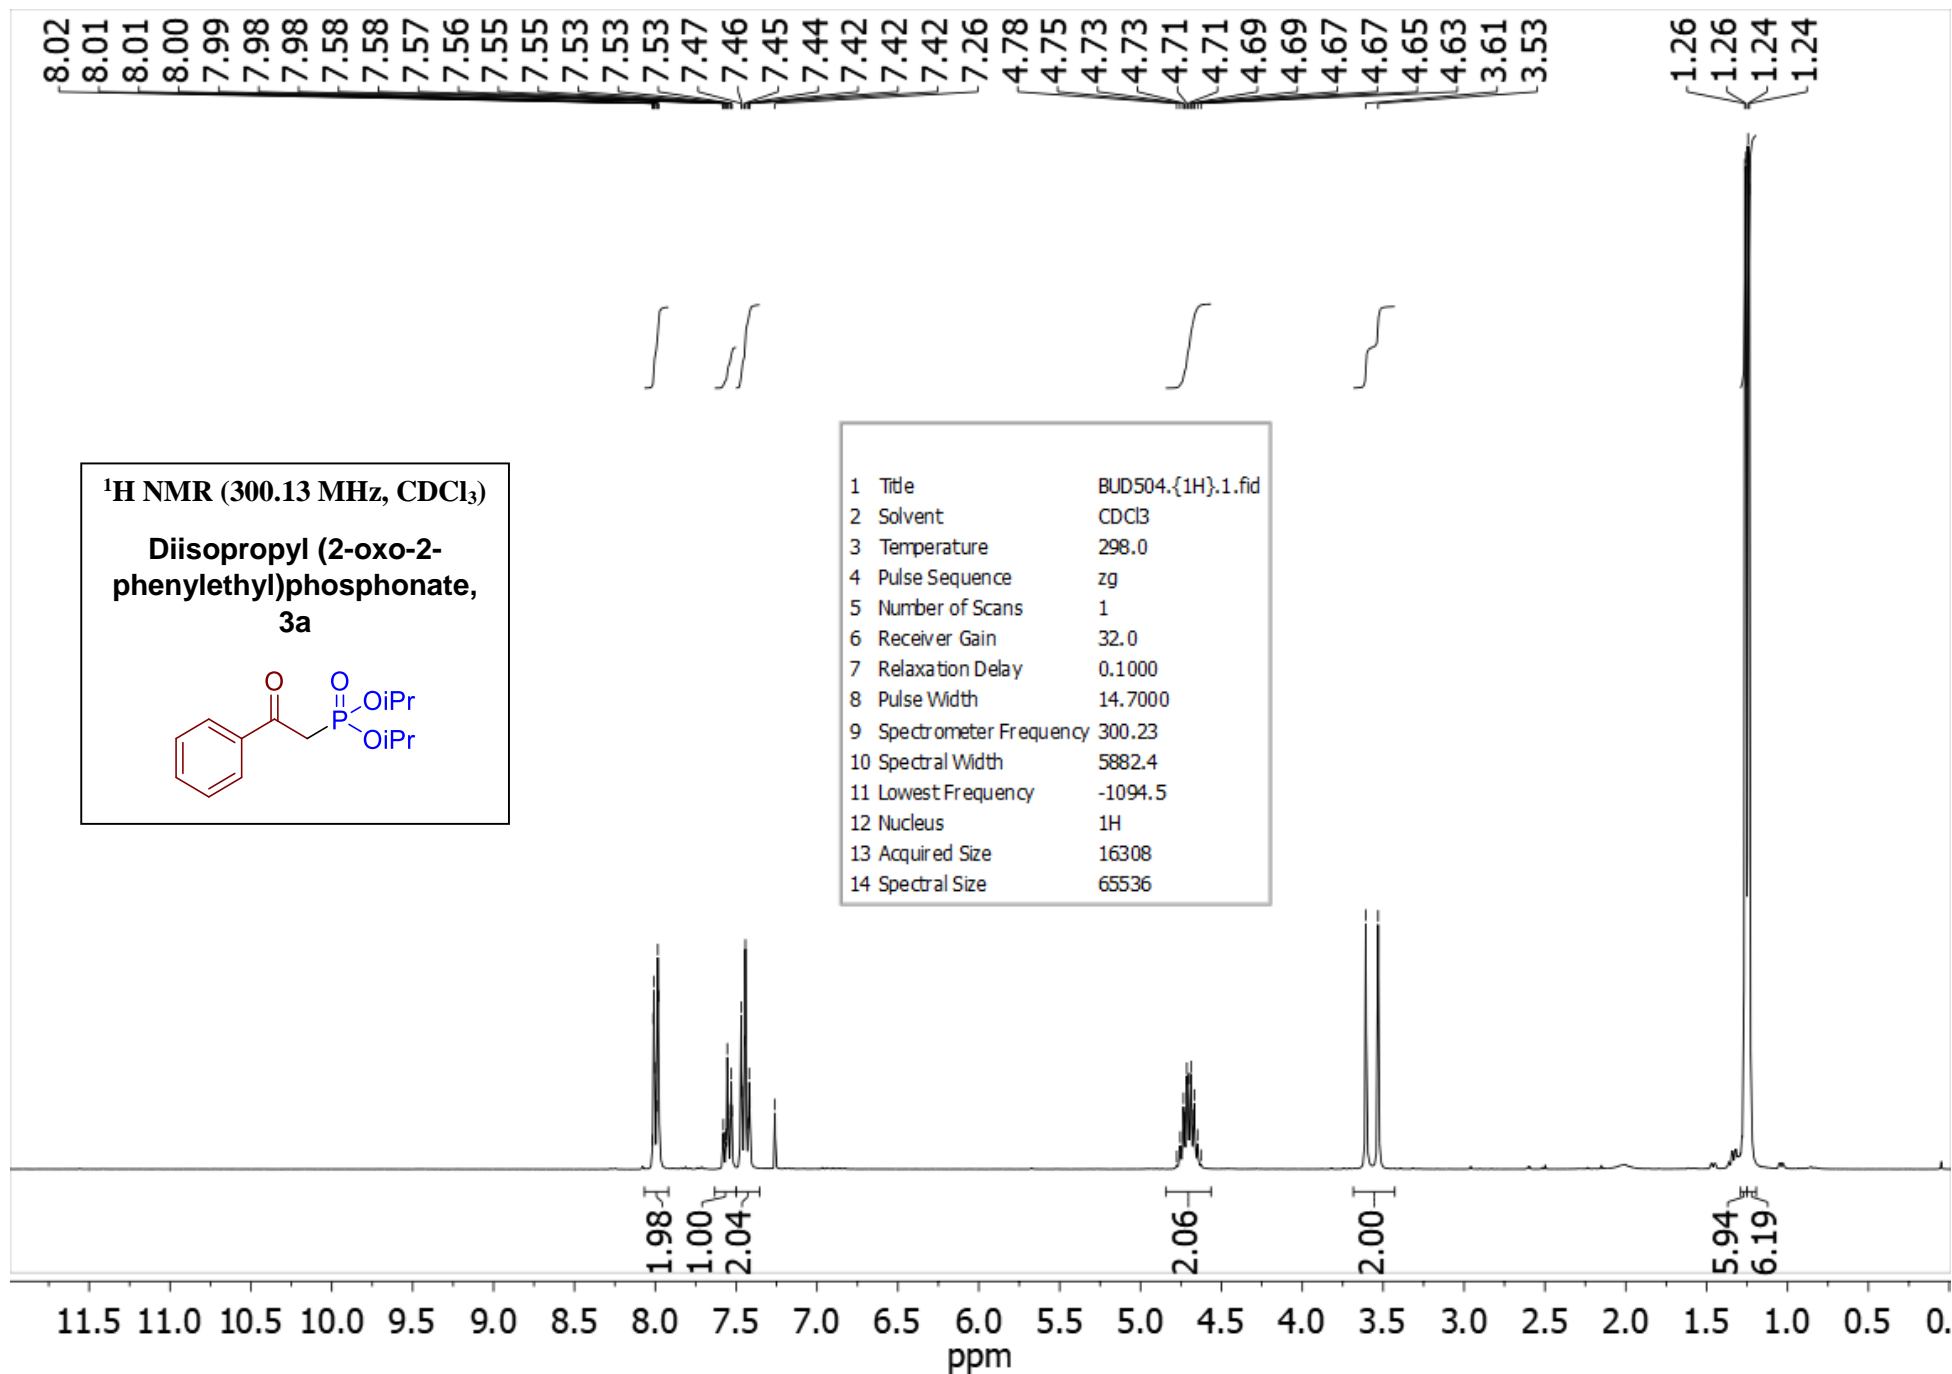

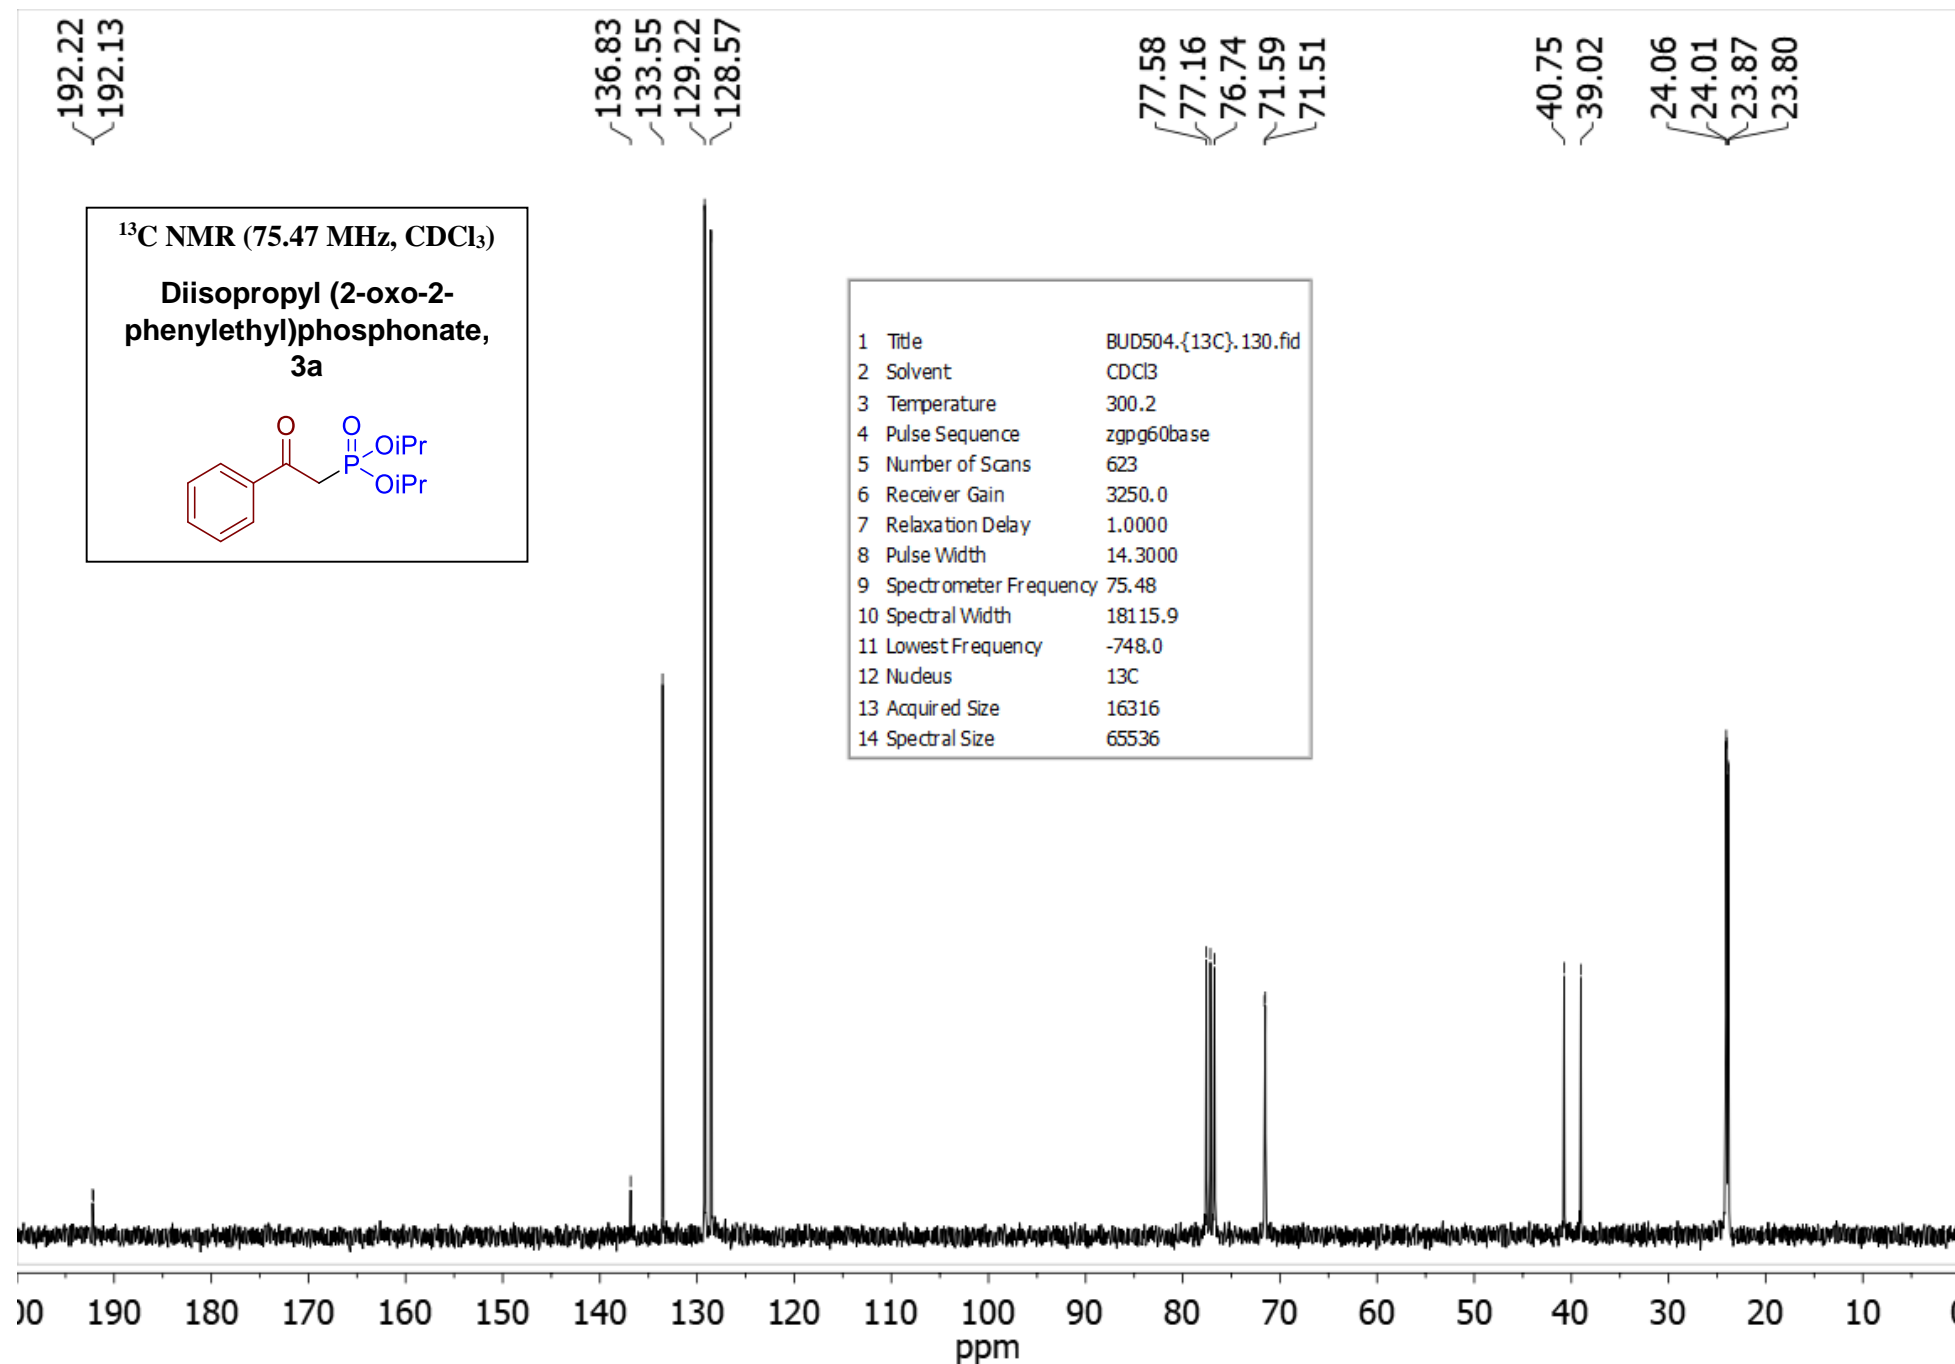



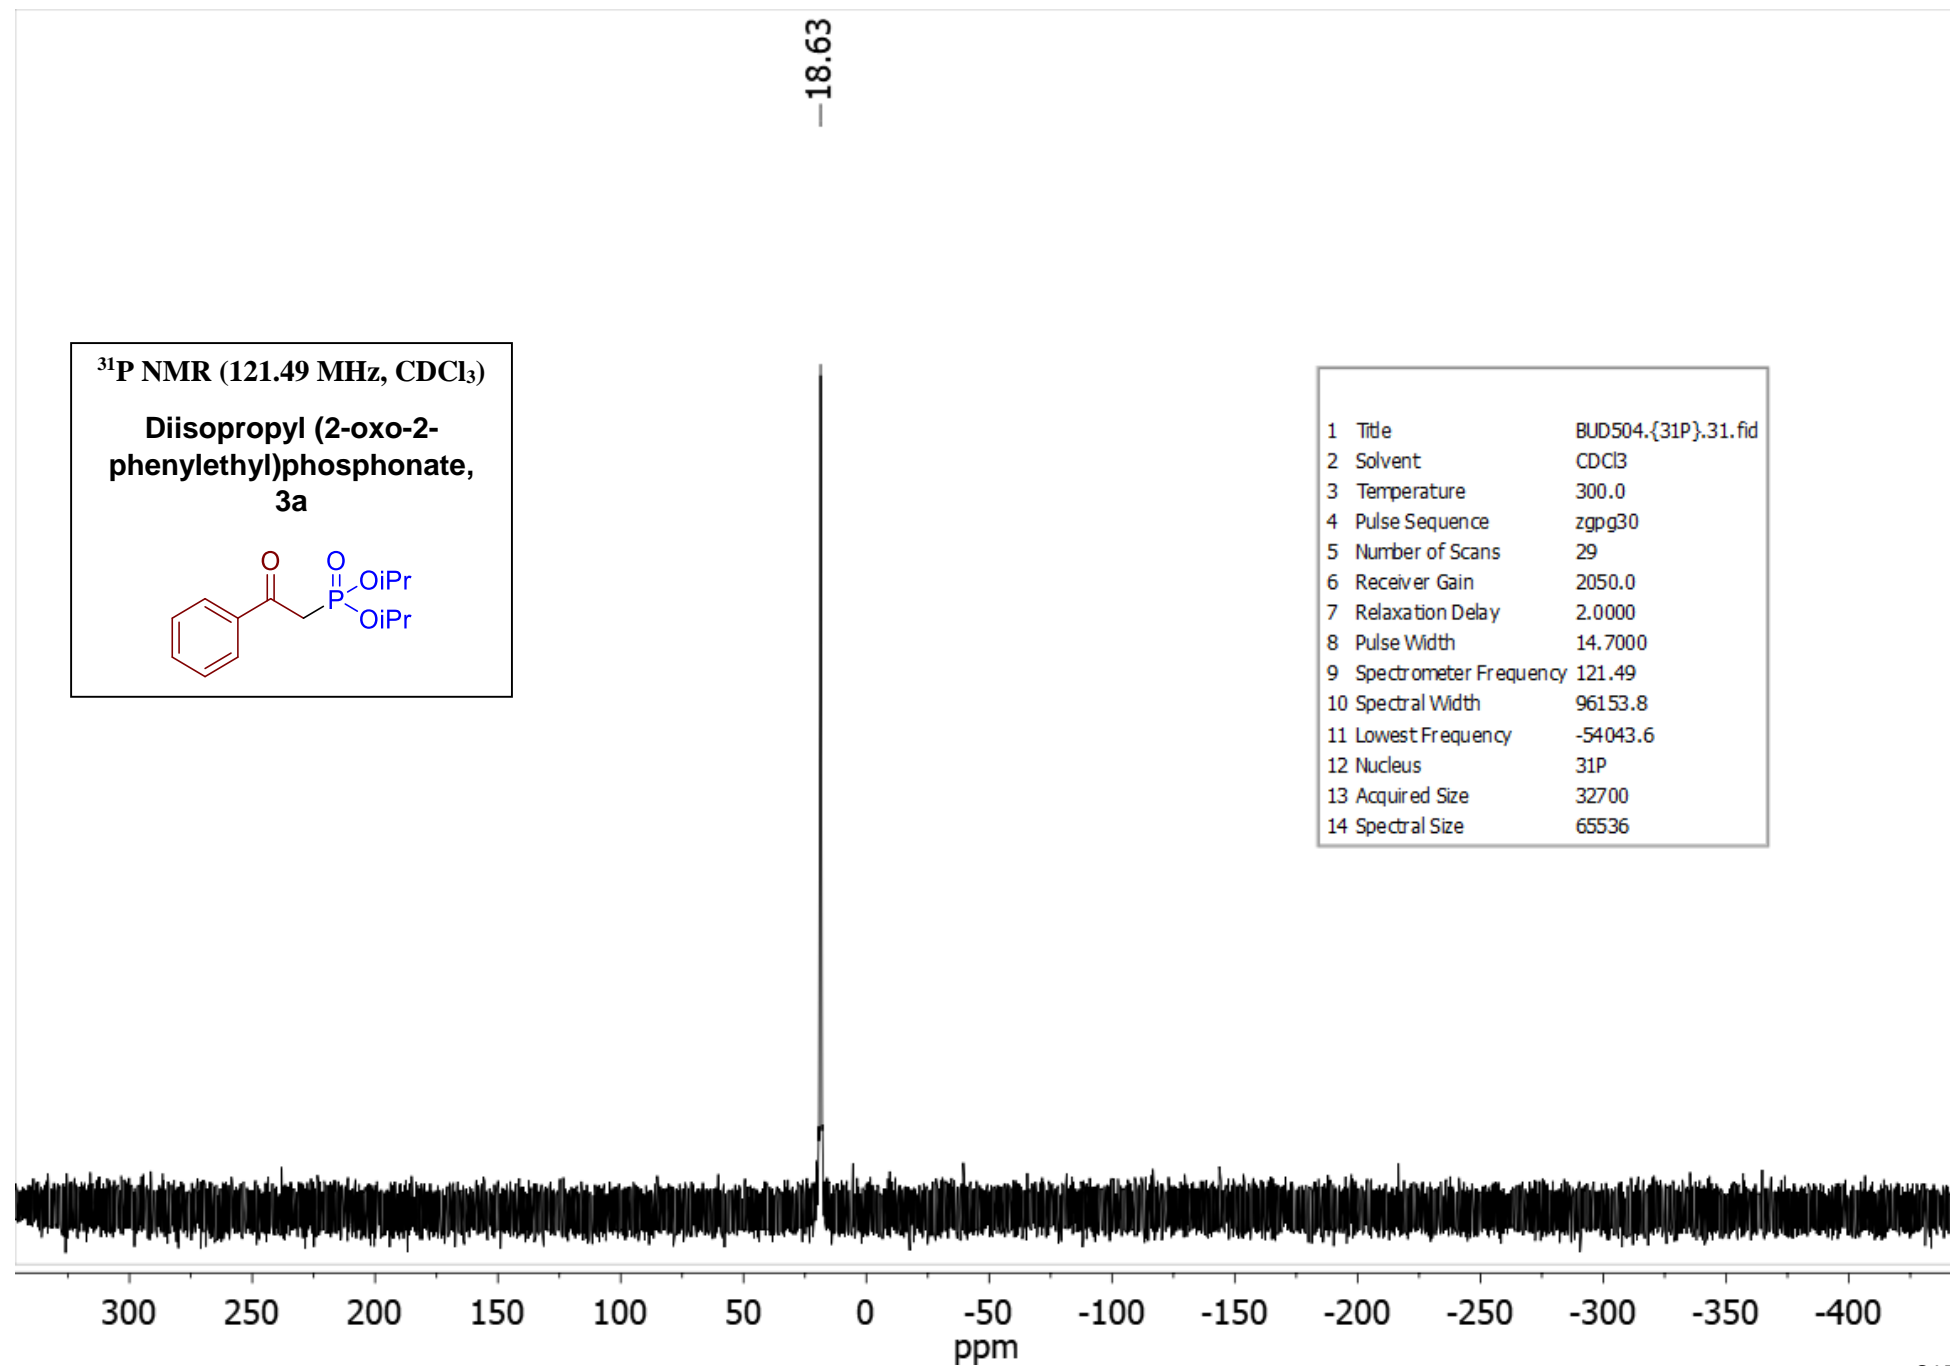

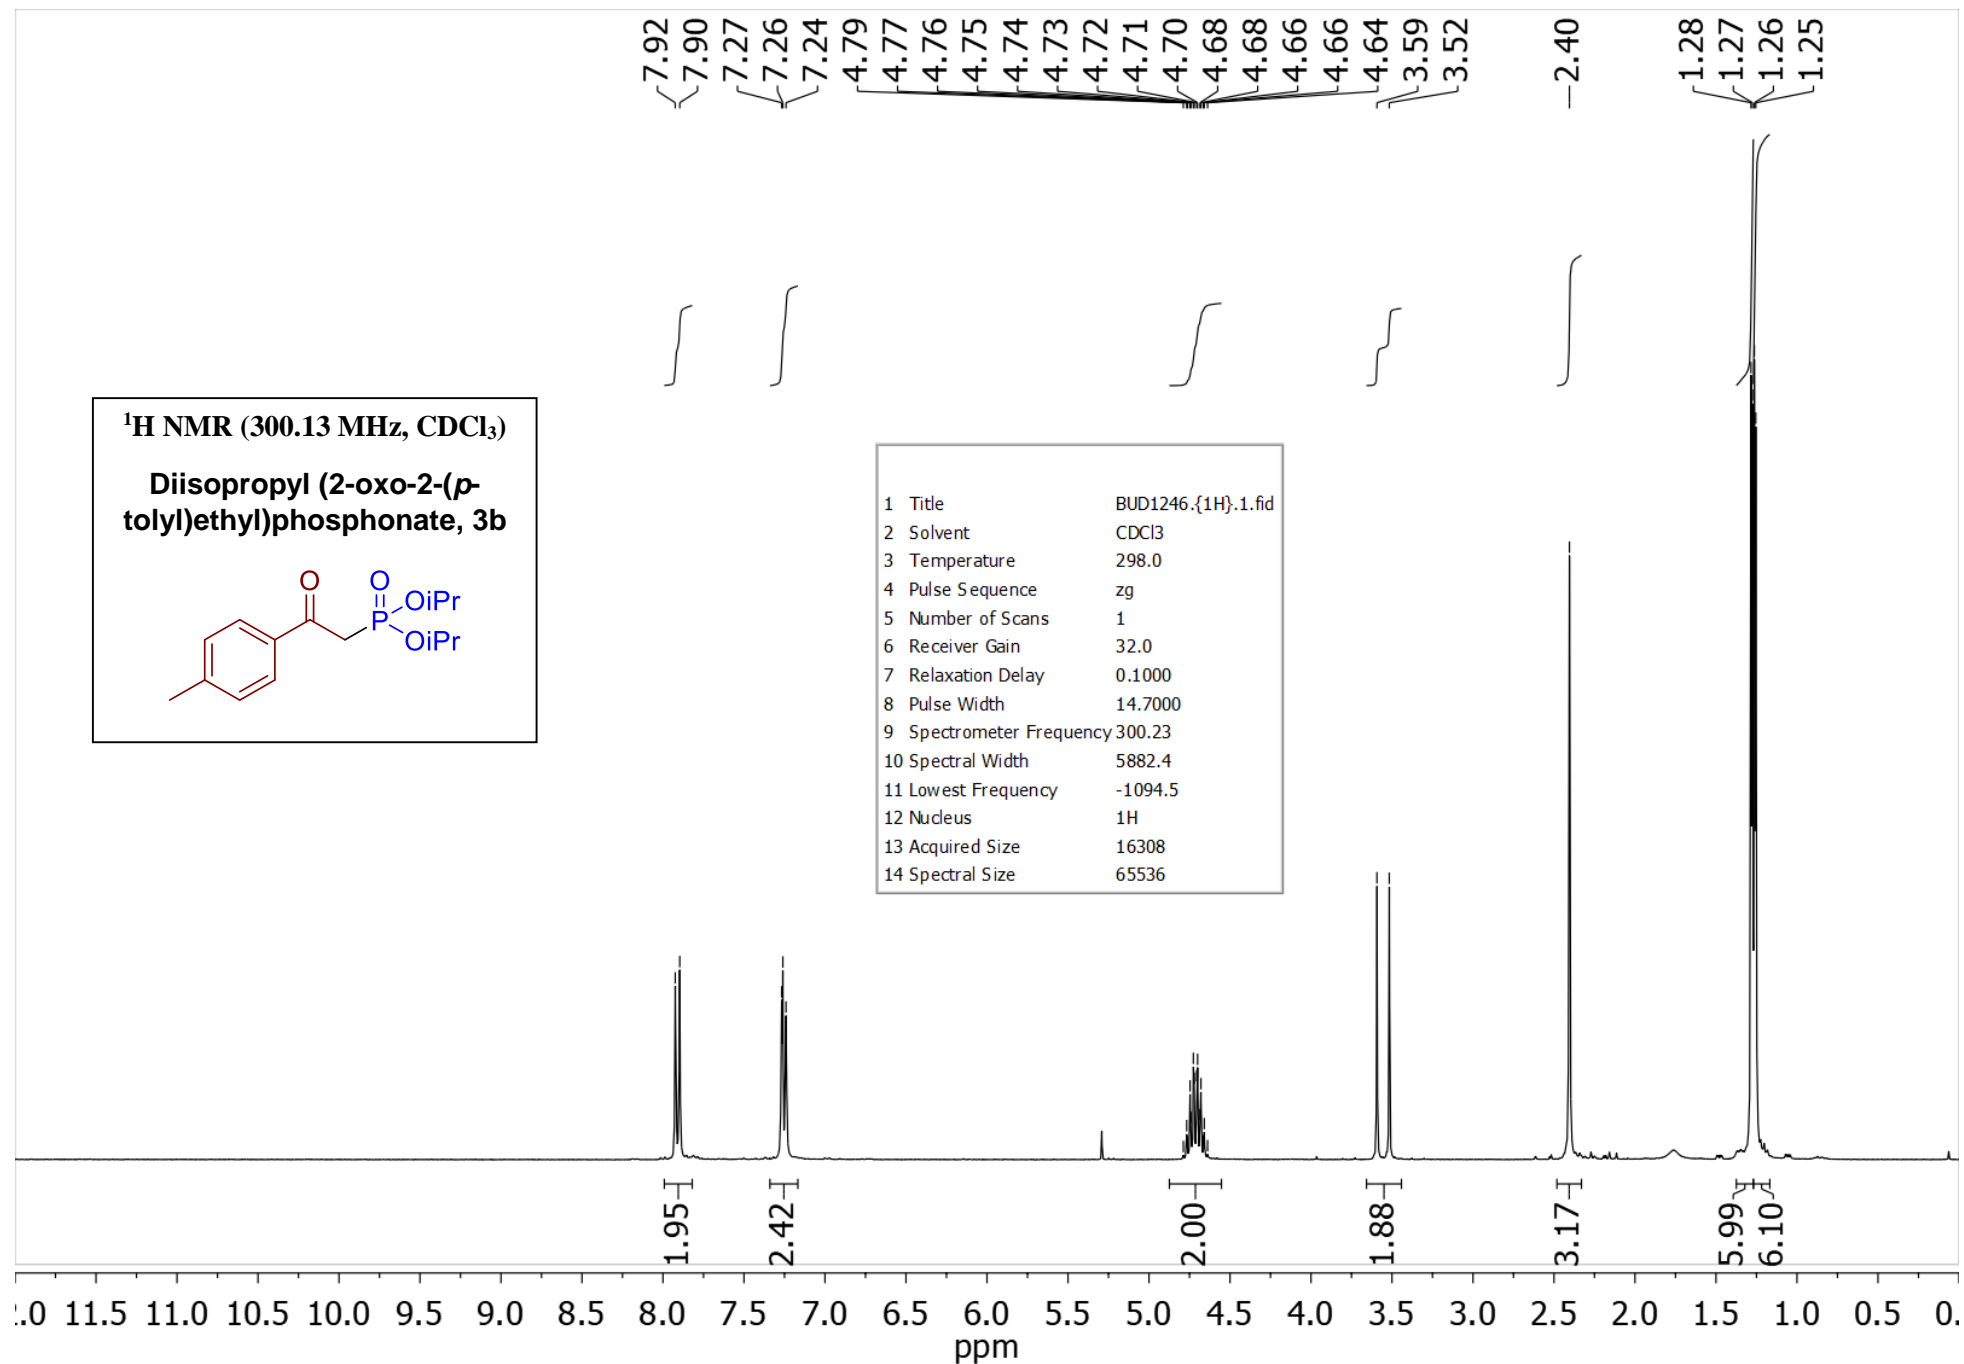

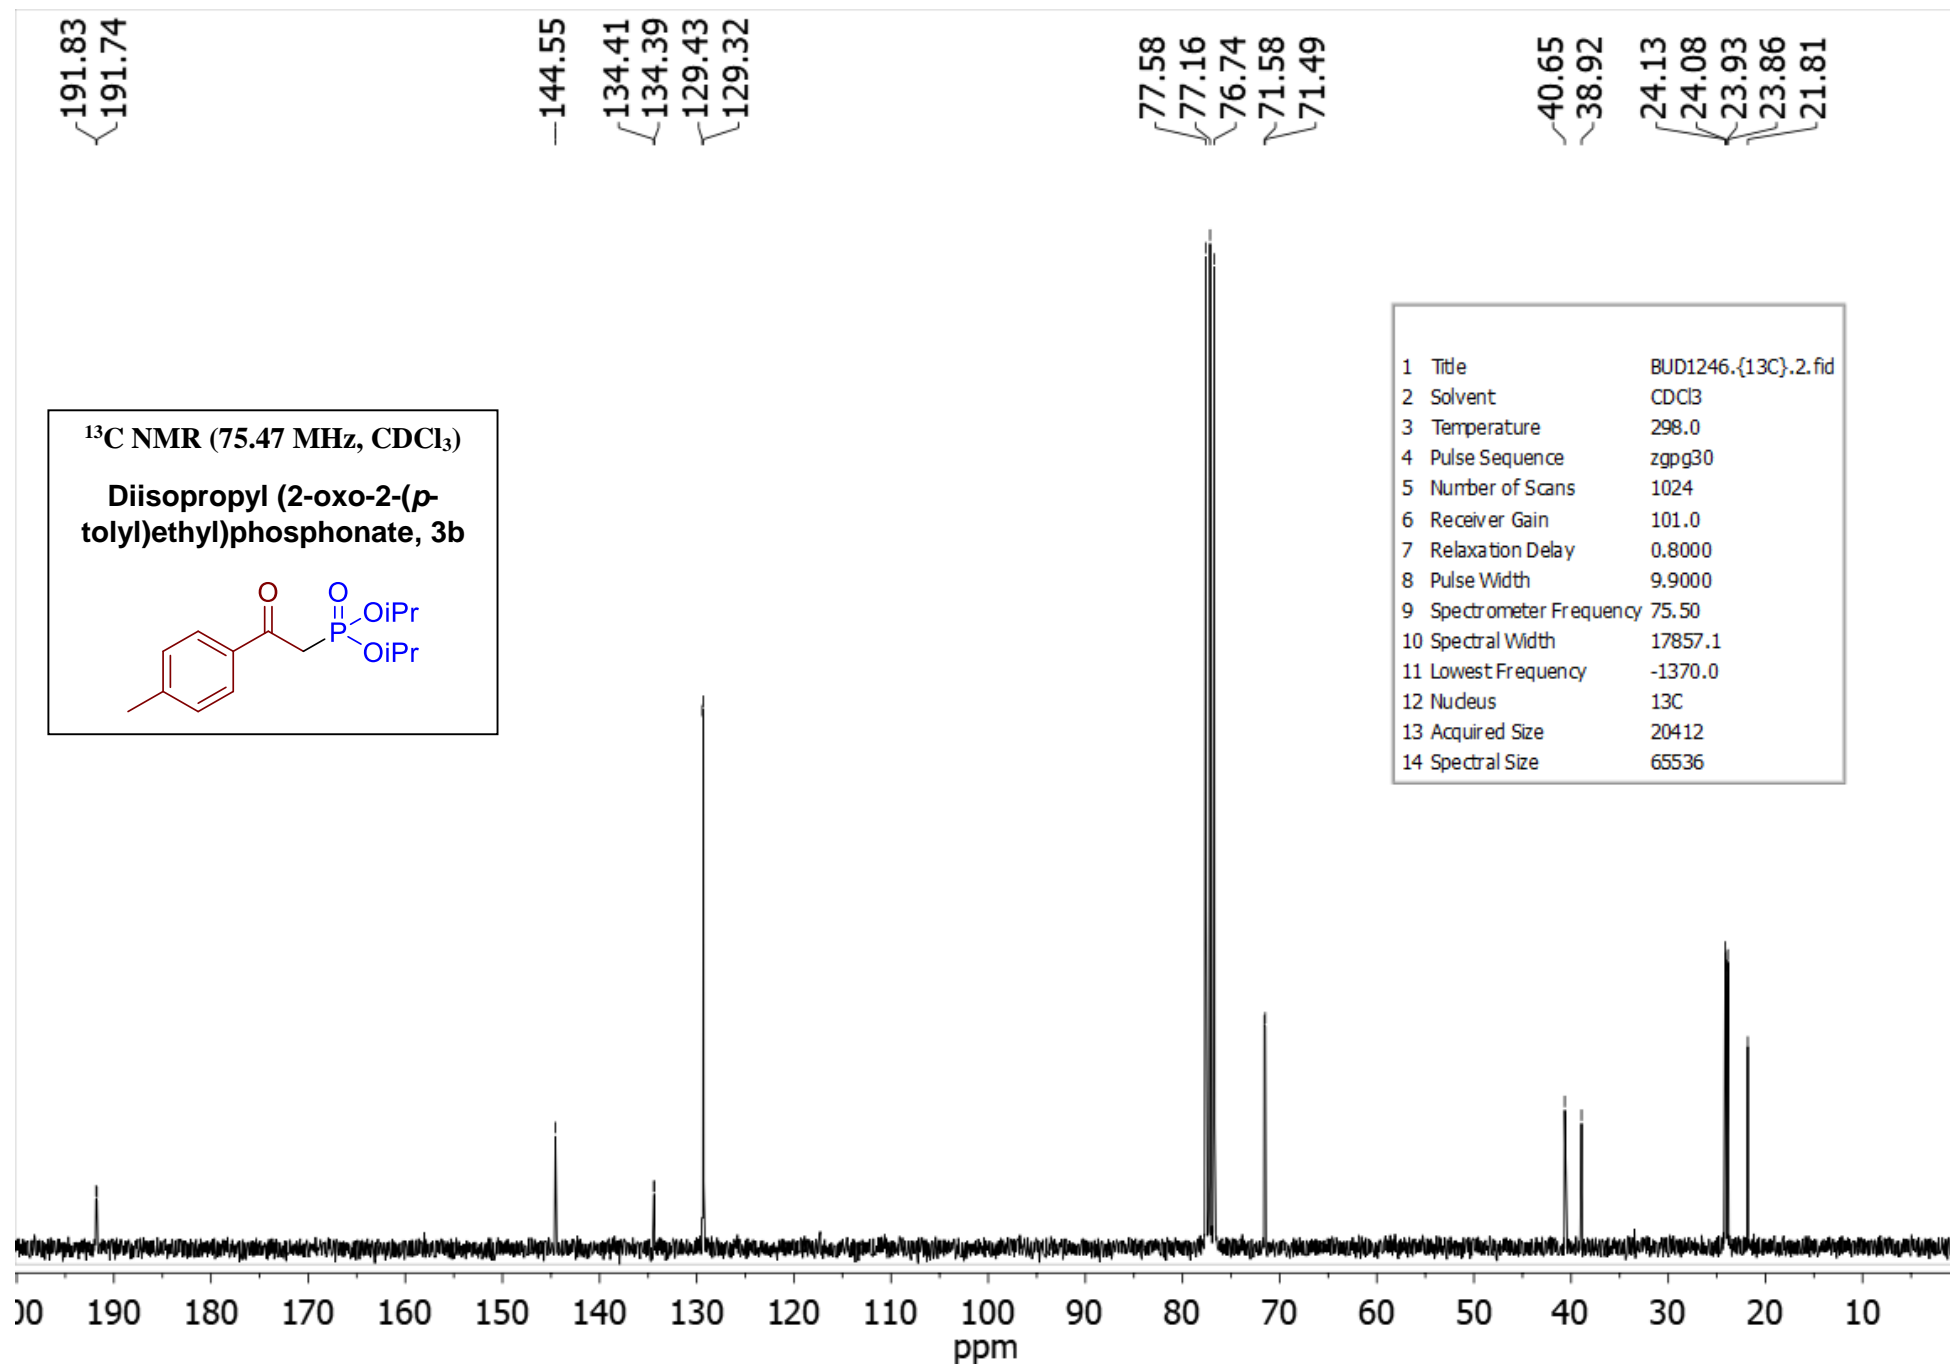

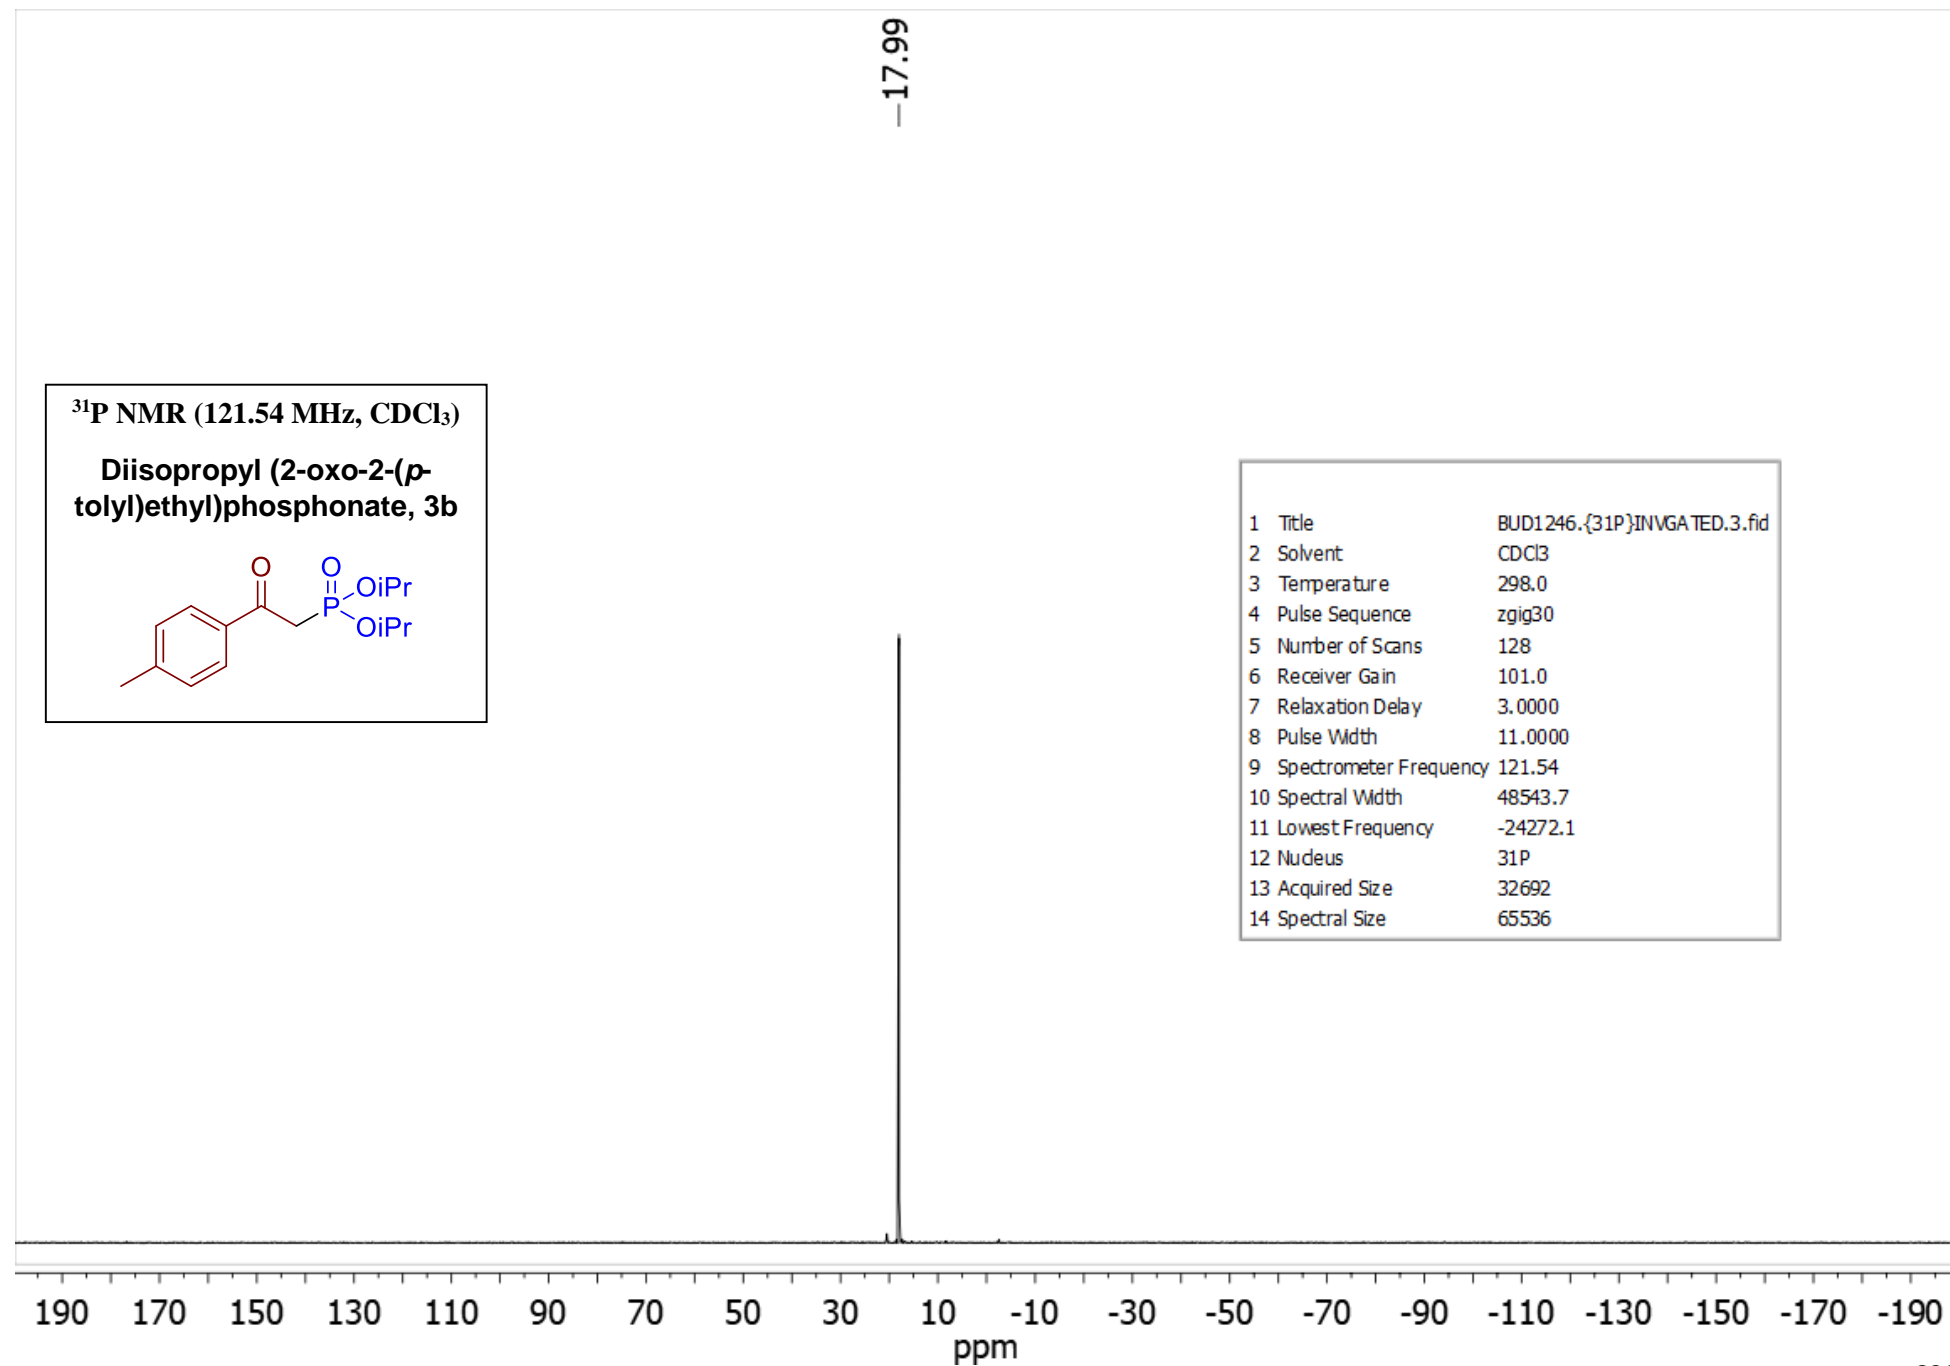

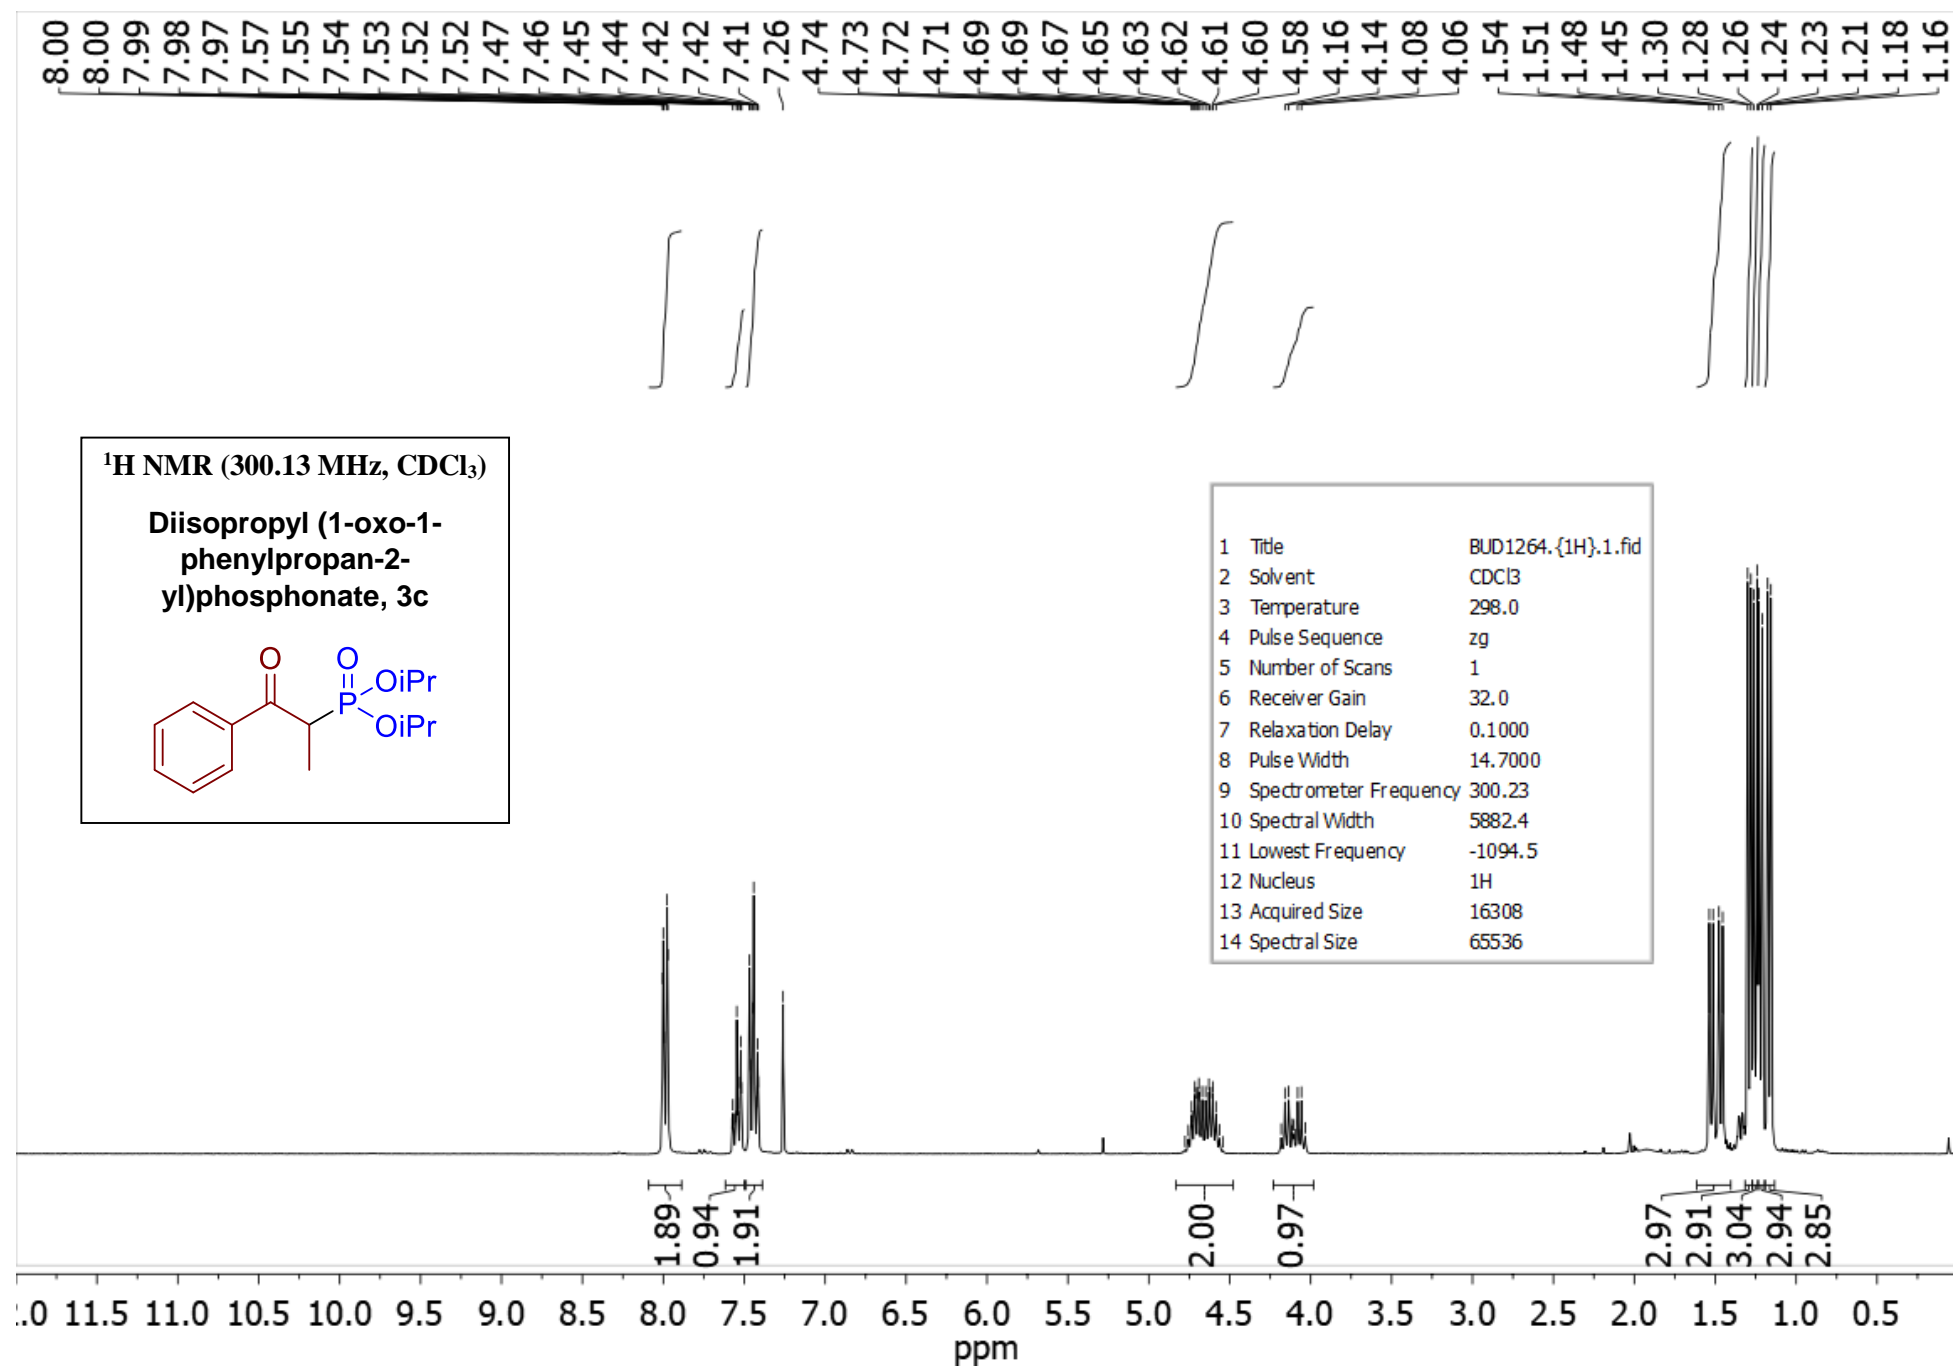

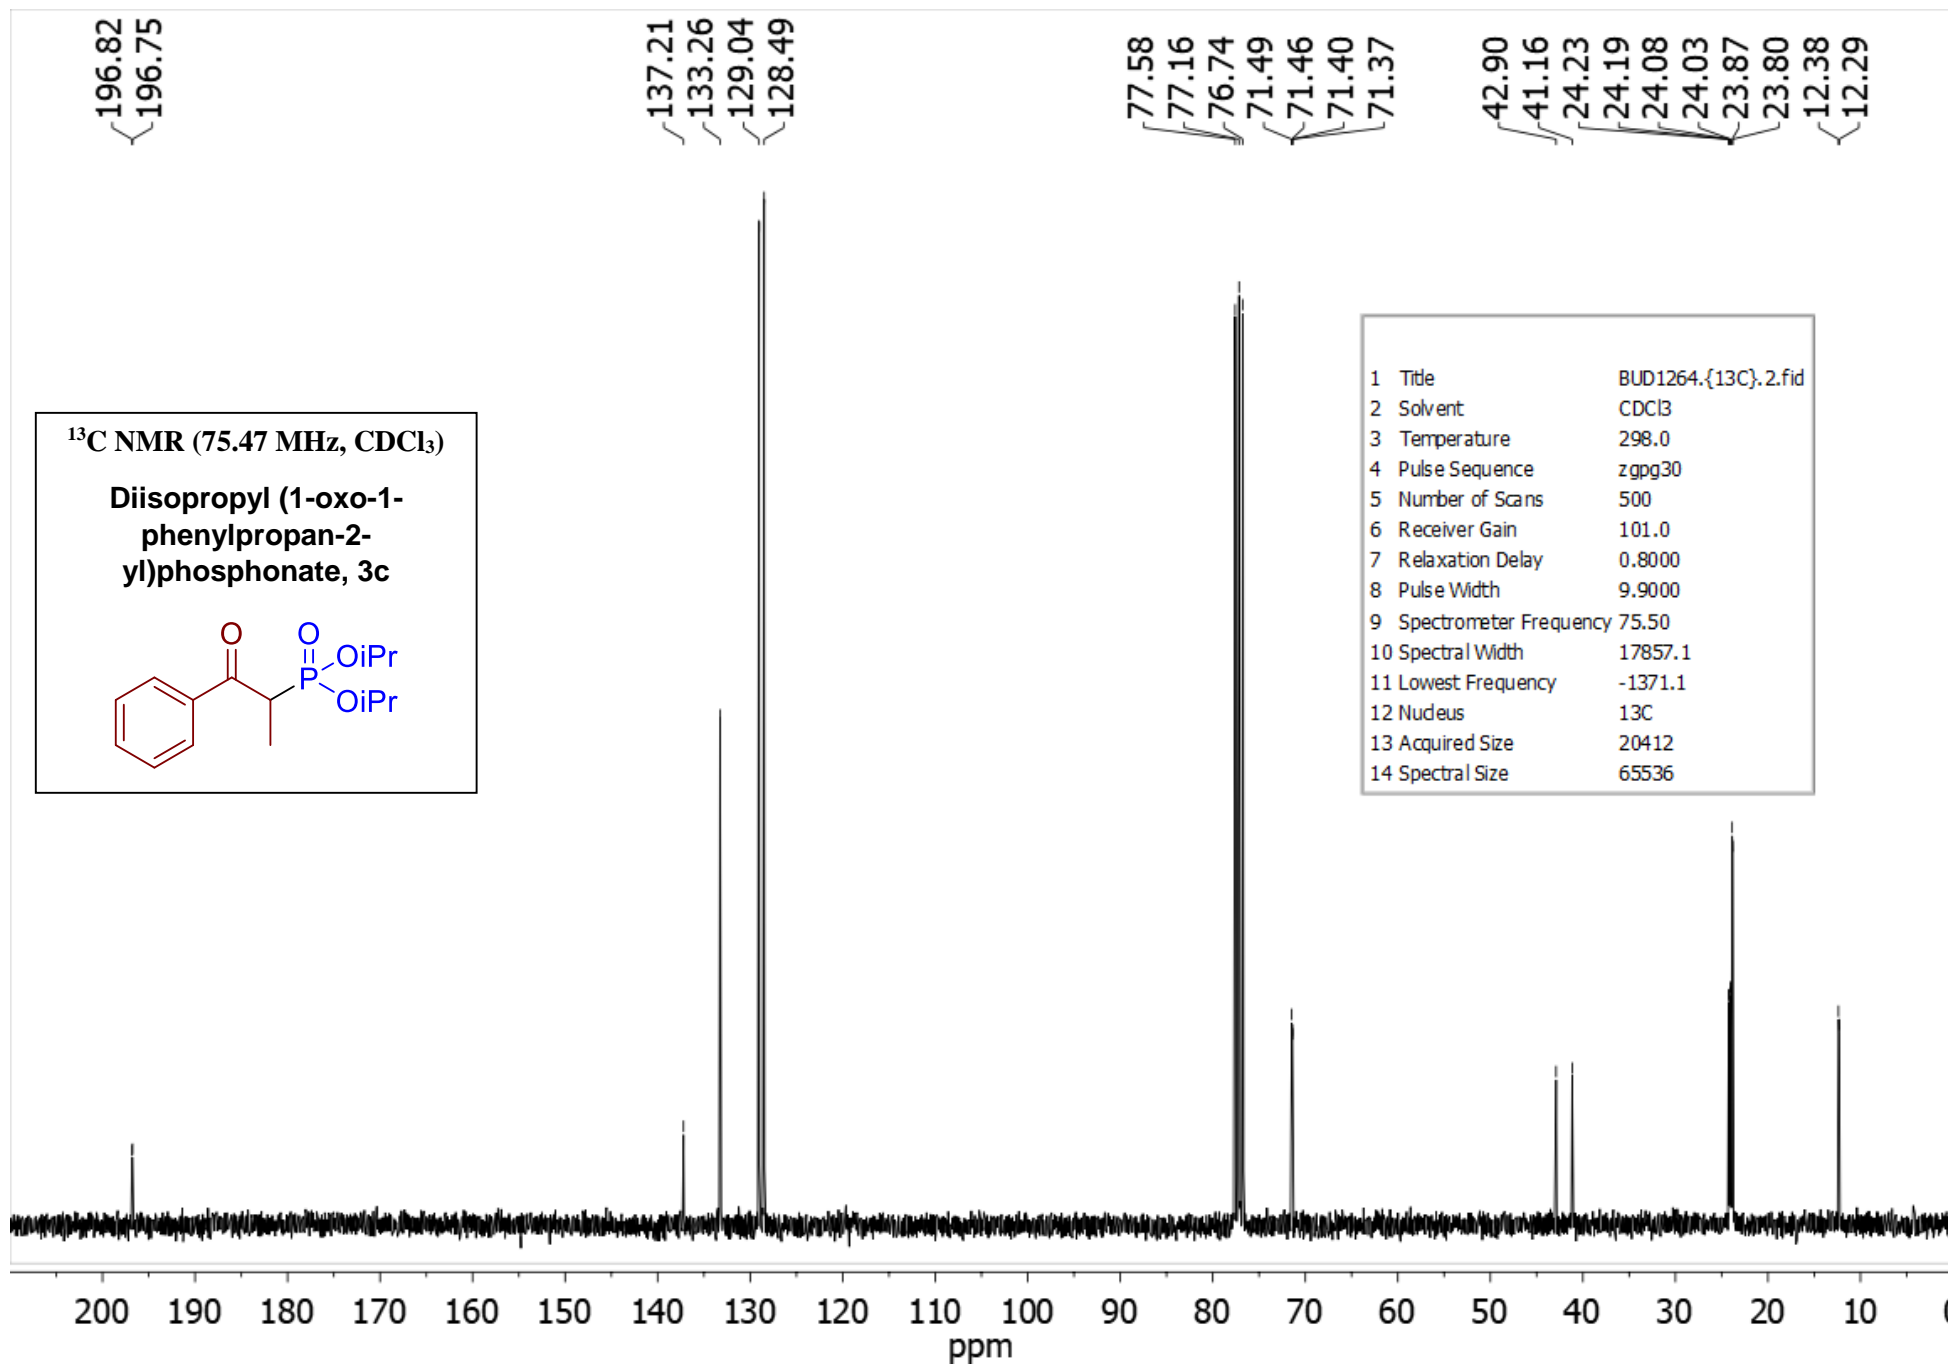

**<sup>31</sup>P NMR (121.54 MHz, CDCl<sub>3</sub>)**

**Diisopropyl (1-oxo-1-phenylpropan-2-yl)phosphonate, 3c**

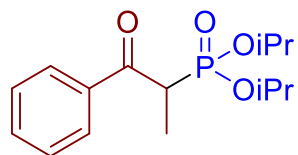

-21.30

|    |                        |                                         |
|----|------------------------|-----------------------------------------|
| 1  | Title                  | BUD1264- <sup>31</sup> P}INWGATED.3.fid |
| 2  | Solvent                | CDCl <sub>3</sub>                       |
| 3  | Temperature            | 298.0                                   |
| 4  | Pulse Sequence         | zgig30                                  |
| 5  | Number of Scans        | 16                                      |
| 6  | Receiver Gain          | 101.0                                   |
| 7  | Relaxation Delay       | 3.0000                                  |
| 8  | Pulse Width            | 11.0000                                 |
| 9  | Spectrometer Frequency | 121.54                                  |
| 10 | Spectral Width         | 48543.7                                 |
| 11 | Lowest Frequency       | -24272.1                                |
| 12 | Nucleus                | <sup>31</sup> P                         |
| 13 | Acquired Size          | 32692                                   |
| 14 | Spectral Size          | 65536                                   |

190 170 150 130 110 90 70 50 30 10 -10 -30 -50 -70 -90 -110 -130 -150 -170 -190  
ppm

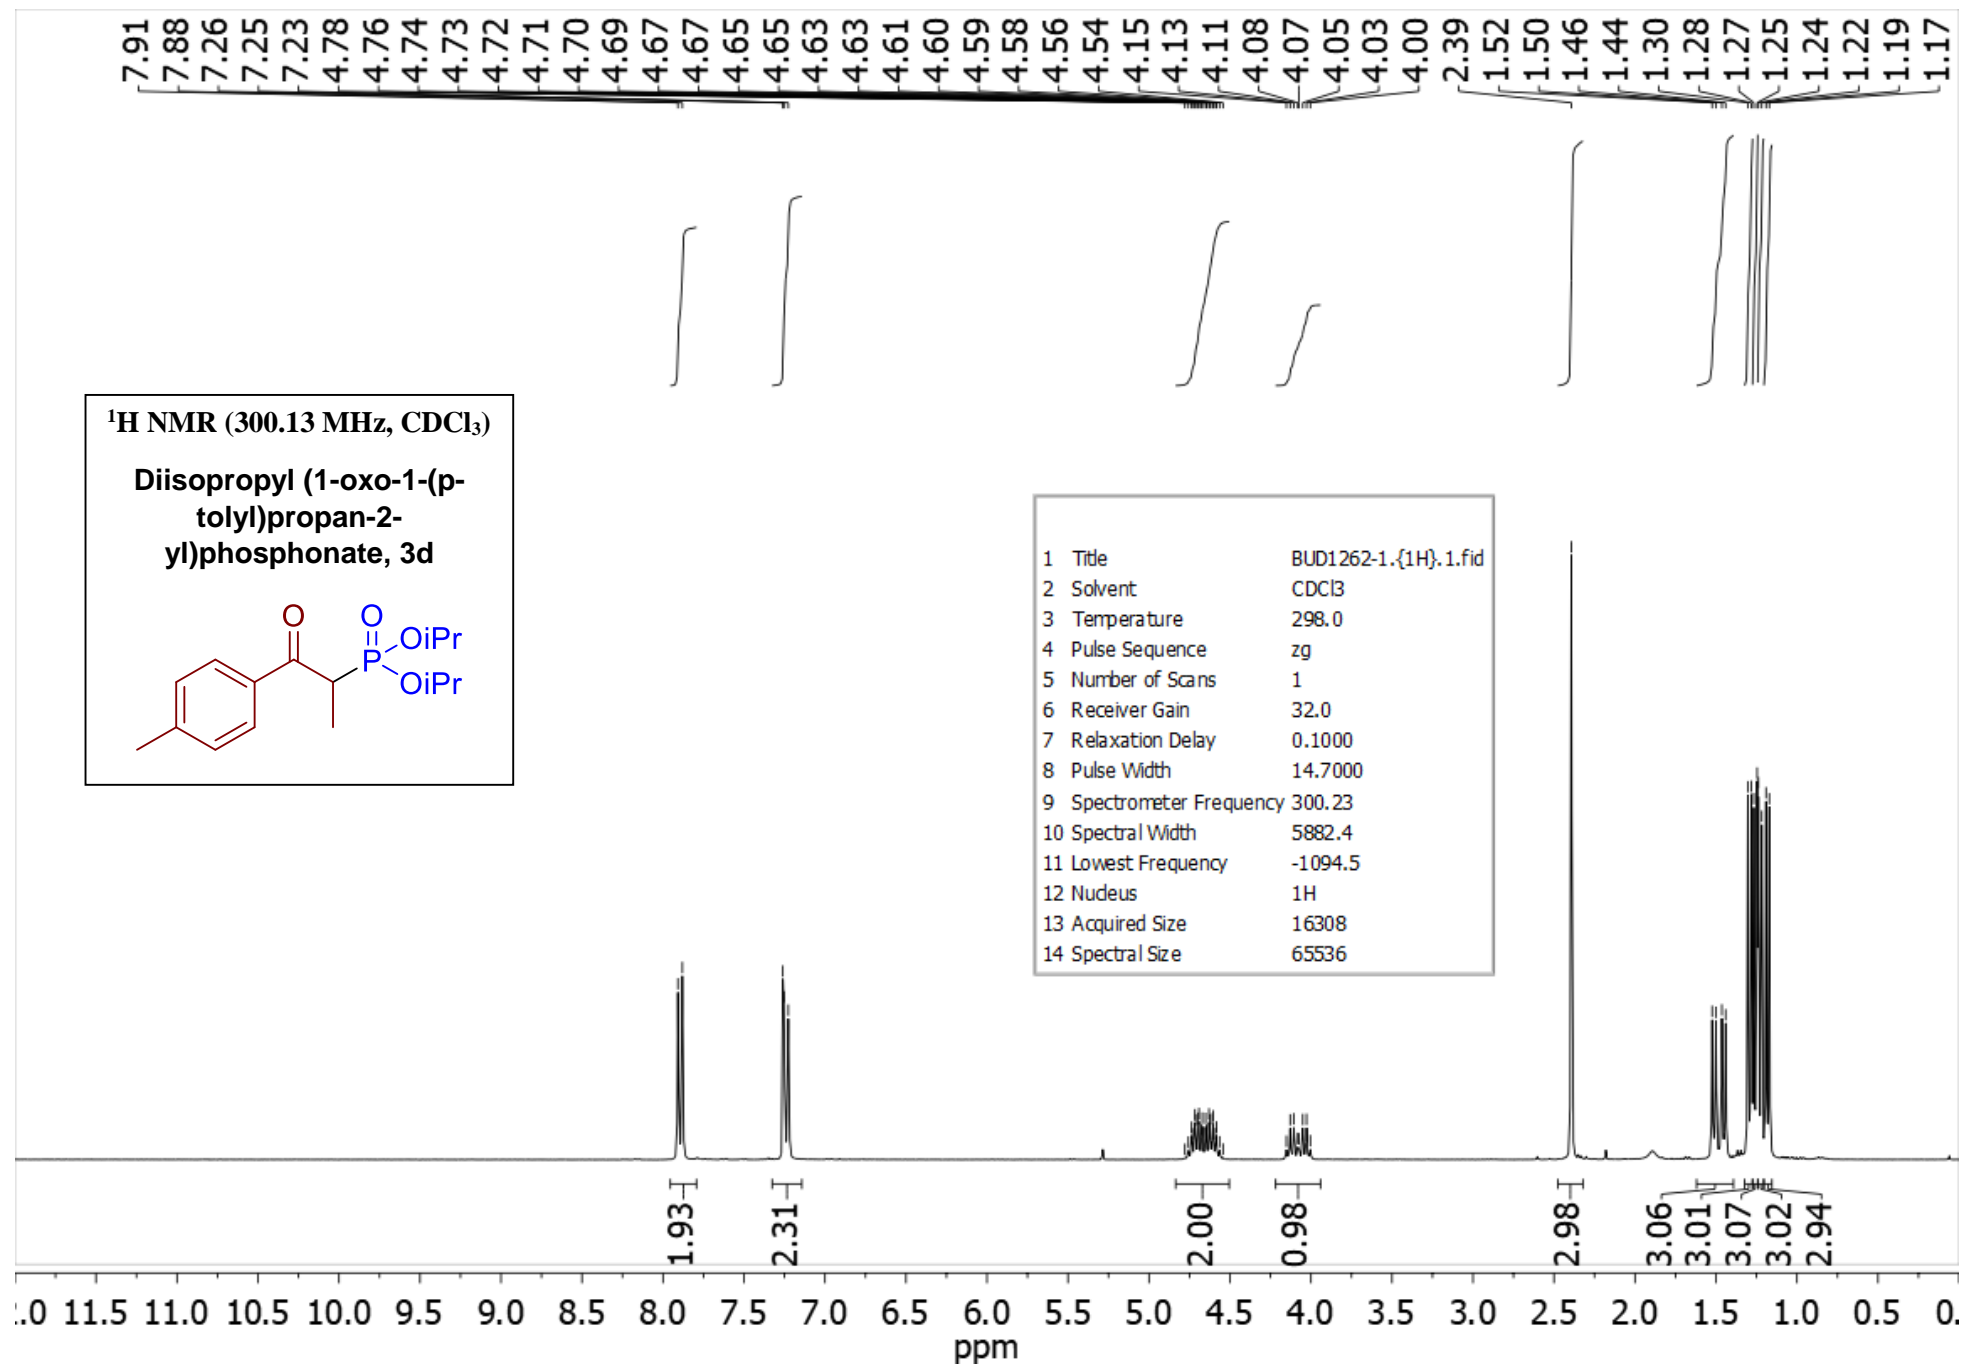



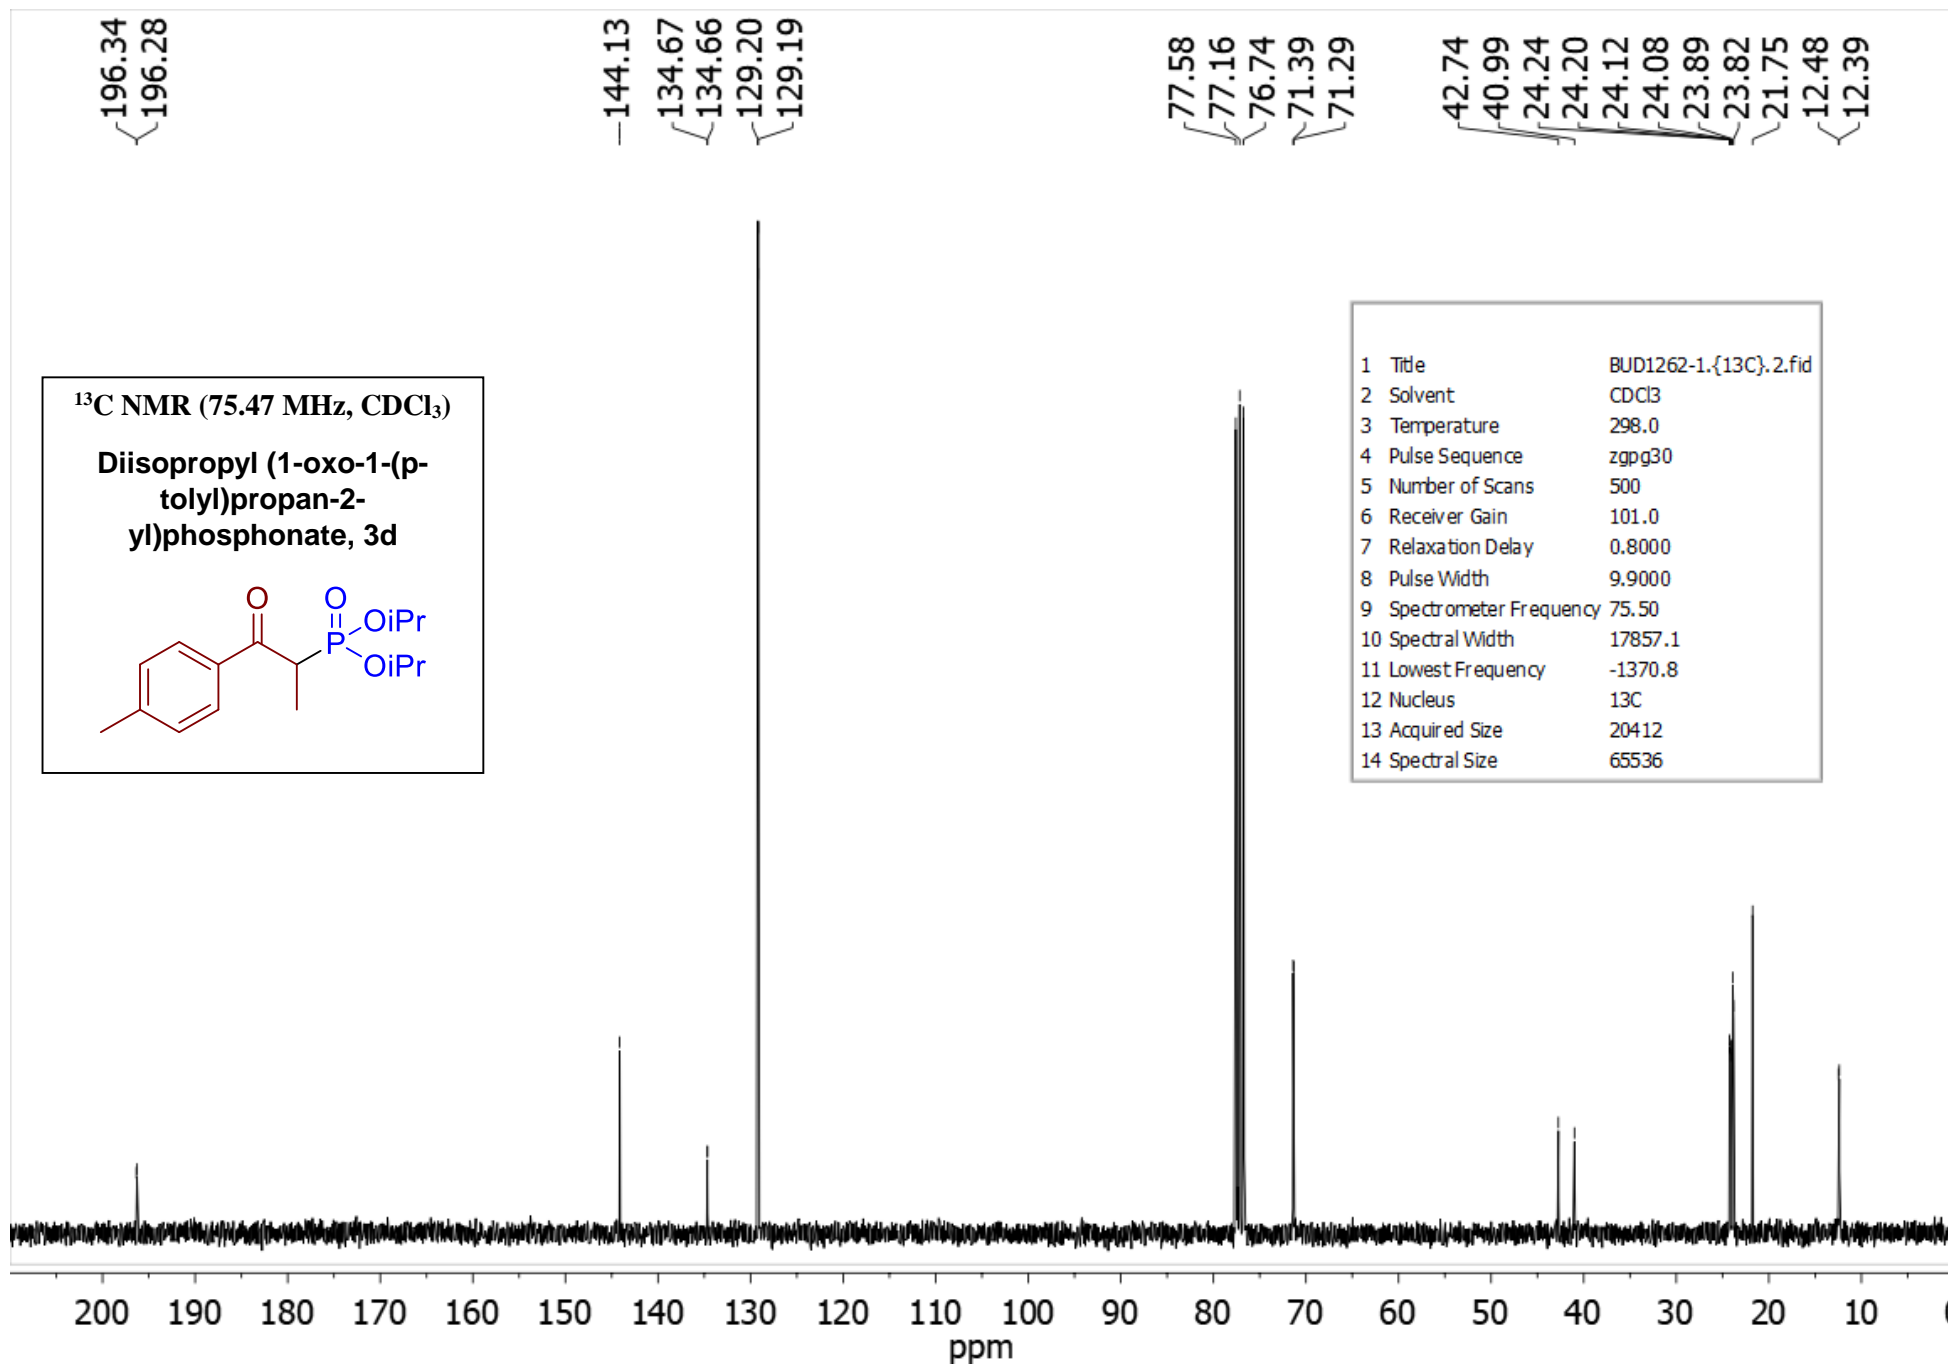

**<sup>31</sup>P NMR (121.54 MHz, CDCl<sub>3</sub>)**

**Diisopropyl (1-oxo-1-(p-tolyl)propan-2-yl)phosphonate, 3d**

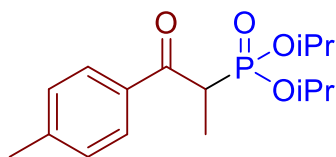

-21.59

|                          |                               |
|--------------------------|-------------------------------|
| 1 Title                  | BUD1262-1.{31P}INWGATED.3.fid |
| 2 Solvent                | CDCl3                         |
| 3 Temperature            | 298.0                         |
| 4 Pulse Sequence         | zgig30                        |
| 5 Number of Scans        | 128                           |
| 6 Receiver Gain          | 101.0                         |
| 7 Relaxation Delay       | 3.0000                        |
| 8 Pulse Width            | 11.0000                       |
| 9 Spectrometer Frequency | 121.54                        |
| 10 Spectral Width        | 48543.7                       |
| 11 Lowest Frequency      | -24272.1                      |
| 12 Nucleus               | 31P                           |
| 13 Acquired Size         | 32692                         |
| 14 Spectral Size         | 65536                         |

190 170 150 130 110 90 70 50 30 10 -10 -30 -50 -70 -90 -110 -130 -150 -170 -190  
ppm

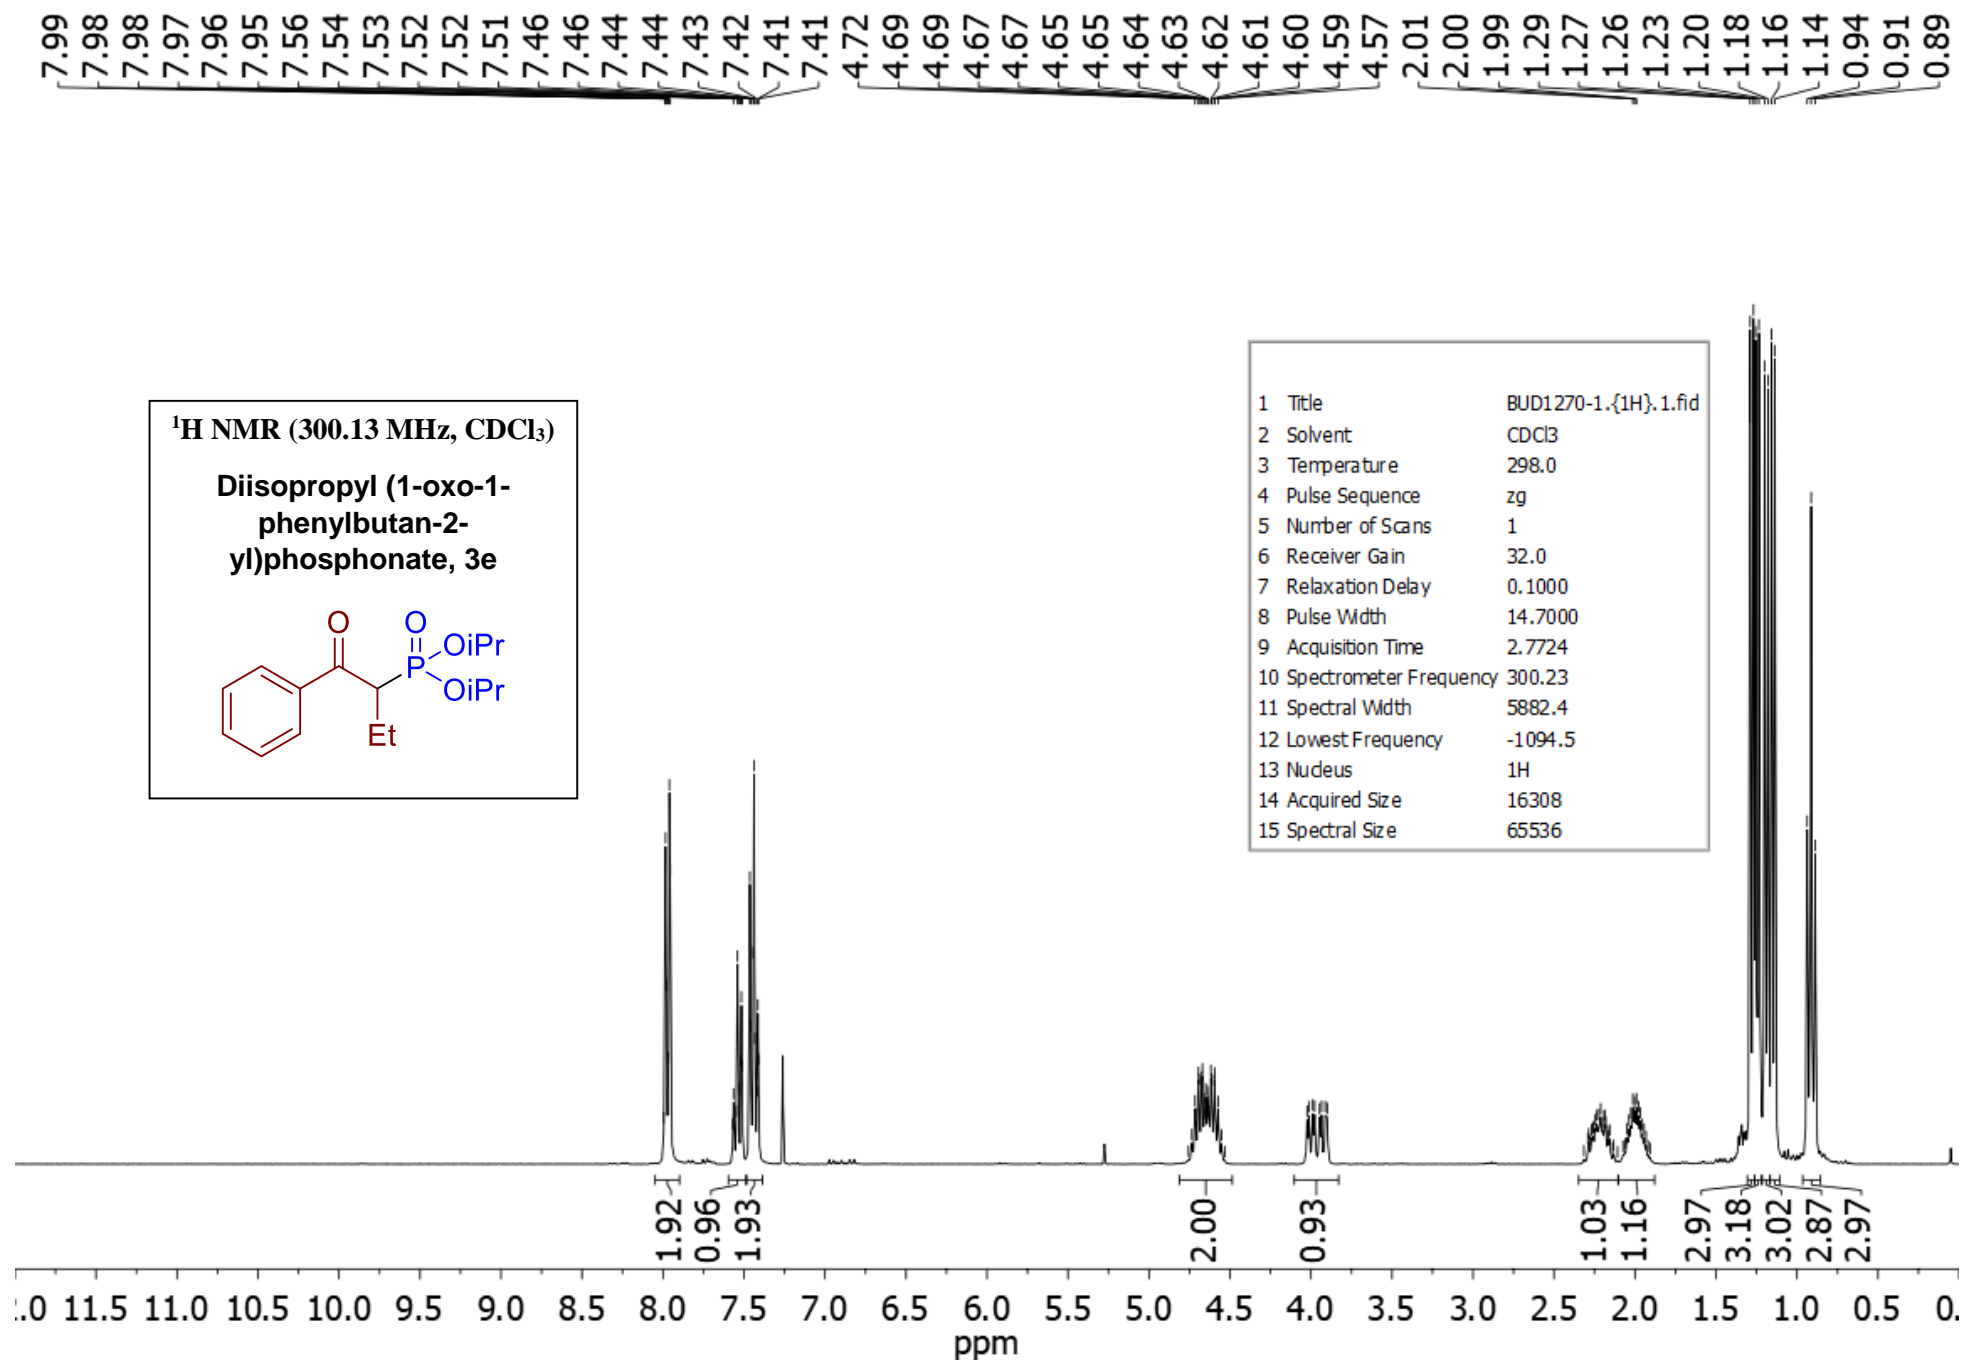

196.69  
196.62

138.28  
133.18  
128.82  
128.51

77.58  
77.16  
76.74  
71.46  
71.37  
71.28

50.65  
48.94

24.23  
24.19  
24.06  
24.02  
23.85  
23.78  
21.35  
21.28  
13.45  
13.24

<sup>13</sup>C NMR (75.47 MHz, CDCl<sub>3</sub>)

Diisopropyl (1-oxo-1-phenylbutan-2-yl)phosphonate, 3e

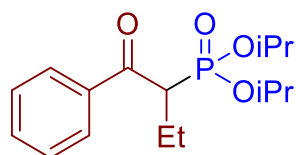

|    |                        |                                   |
|----|------------------------|-----------------------------------|
| 1  | Title                  | BUD1270-1- <sup>13</sup> C}.2.fid |
| 2  | Solvent                | CDCl <sub>3</sub>                 |
| 3  | Temperature            | 298.0                             |
| 4  | Pulse Sequence         | zgpg30                            |
| 5  | Number of Scans        | 700                               |
| 6  | Receiver Gain          | 101.0                             |
| 7  | Relaxation Delay       | 0.8000                            |
| 8  | Pulse Width            | 9.9000                            |
| 9  | Acquisition Time       | 1.1431                            |
| 10 | Spectrometer Frequency | 75.50                             |
| 11 | Spectral Width         | 17857.1                           |
| 12 | Lowest Frequency       | -1372.0                           |
| 13 | Nucleus                | <sup>13</sup> C                   |
| 14 | Acquired Size          | 20412                             |
| 15 | Spectral Size          | 65536                             |

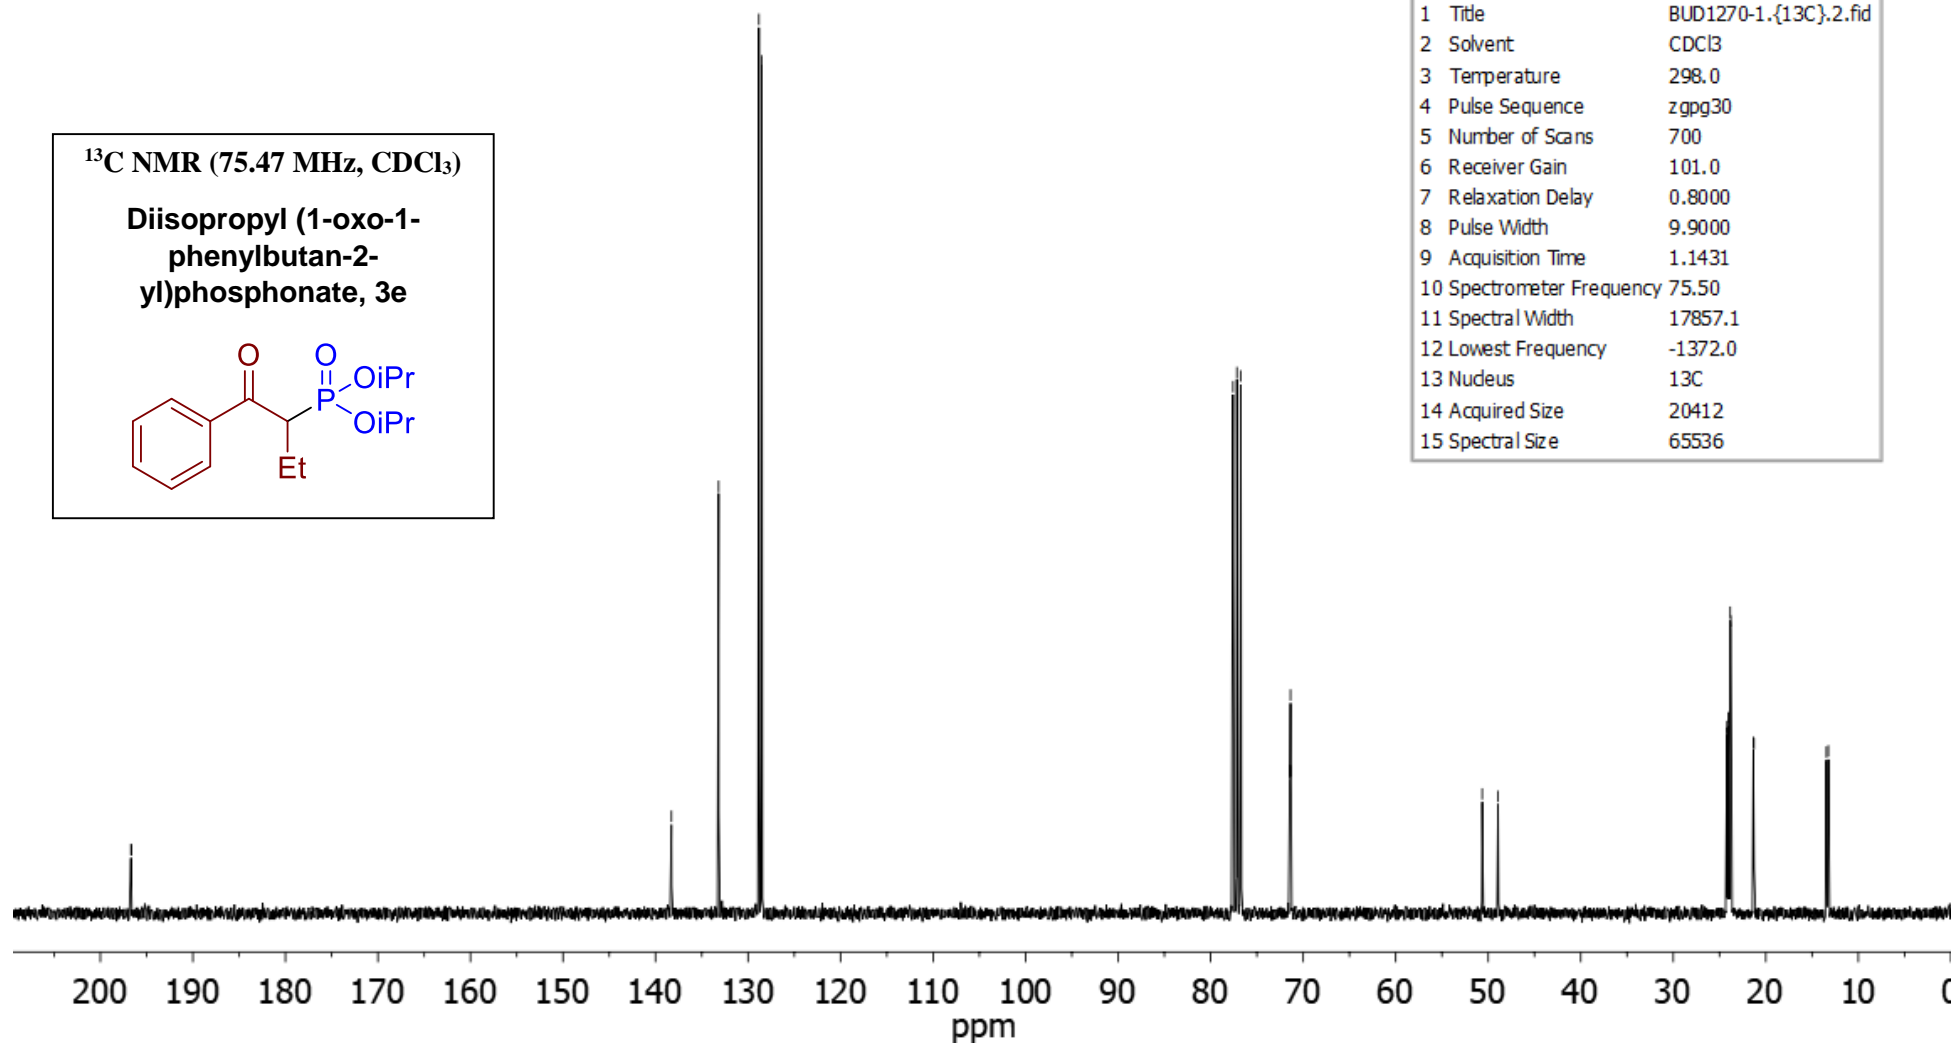

**<sup>31</sup>P NMR (121.54 MHz, CDCl<sub>3</sub>)**

**Diisopropyl (1-oxo-1-phenylbutan-2-yl)phosphonate, 3e**

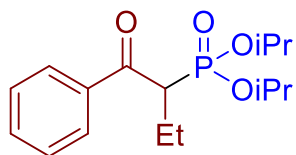

—20.36

|                          |                               |
|--------------------------|-------------------------------|
| 1 Title                  | BUD1270-1.{31P}INVGATED.3.fid |
| 2 Solvent                | CDCl3                         |
| 3 Temperature            | 298.0                         |
| 4 Pulse Sequence         | zgig30                        |
| 5 Number of Scans        | 128                           |
| 6 Receiver Gain          | 101.0                         |
| 7 Relaxation Delay       | 3.0000                        |
| 8 Pulse Width            | 11.0000                       |
| 9 Spectrometer Frequency | 121.54                        |
| 10 Spectral Width        | 48543.7                       |
| 11 Lowest Frequency      | -24272.1                      |
| 12 Nucleus               | 31P                           |
| 13 Acquired Size         | 32692                         |
| 14 Spectral Size         | 65536                         |

190 170 150 130 110 90 70 50 30 10 -10 -30 -50 -70 -90 -110 -130 -150 -170 -190  
ppm

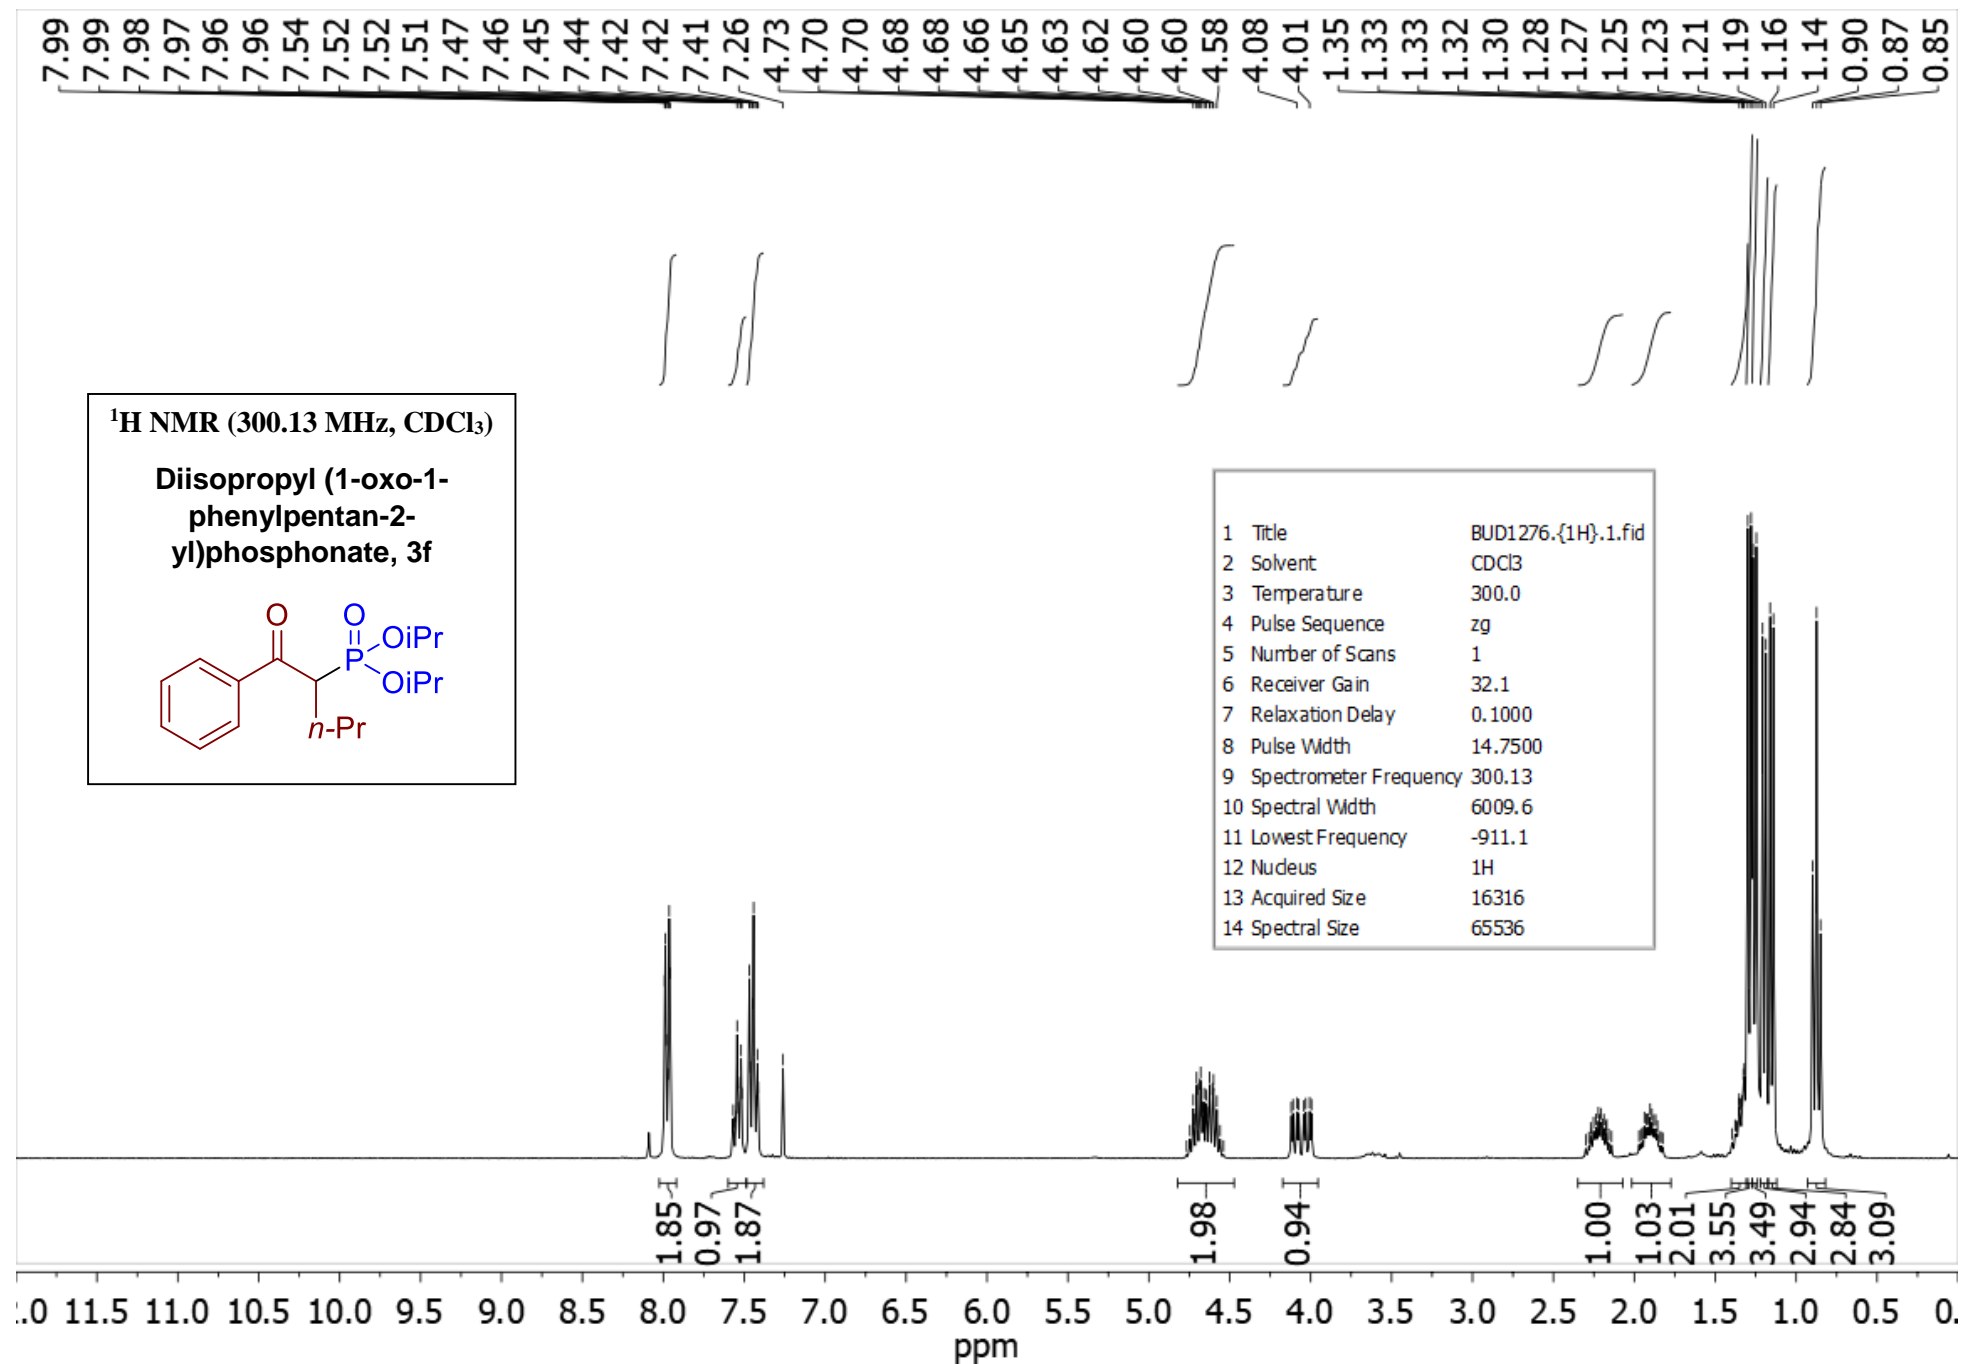

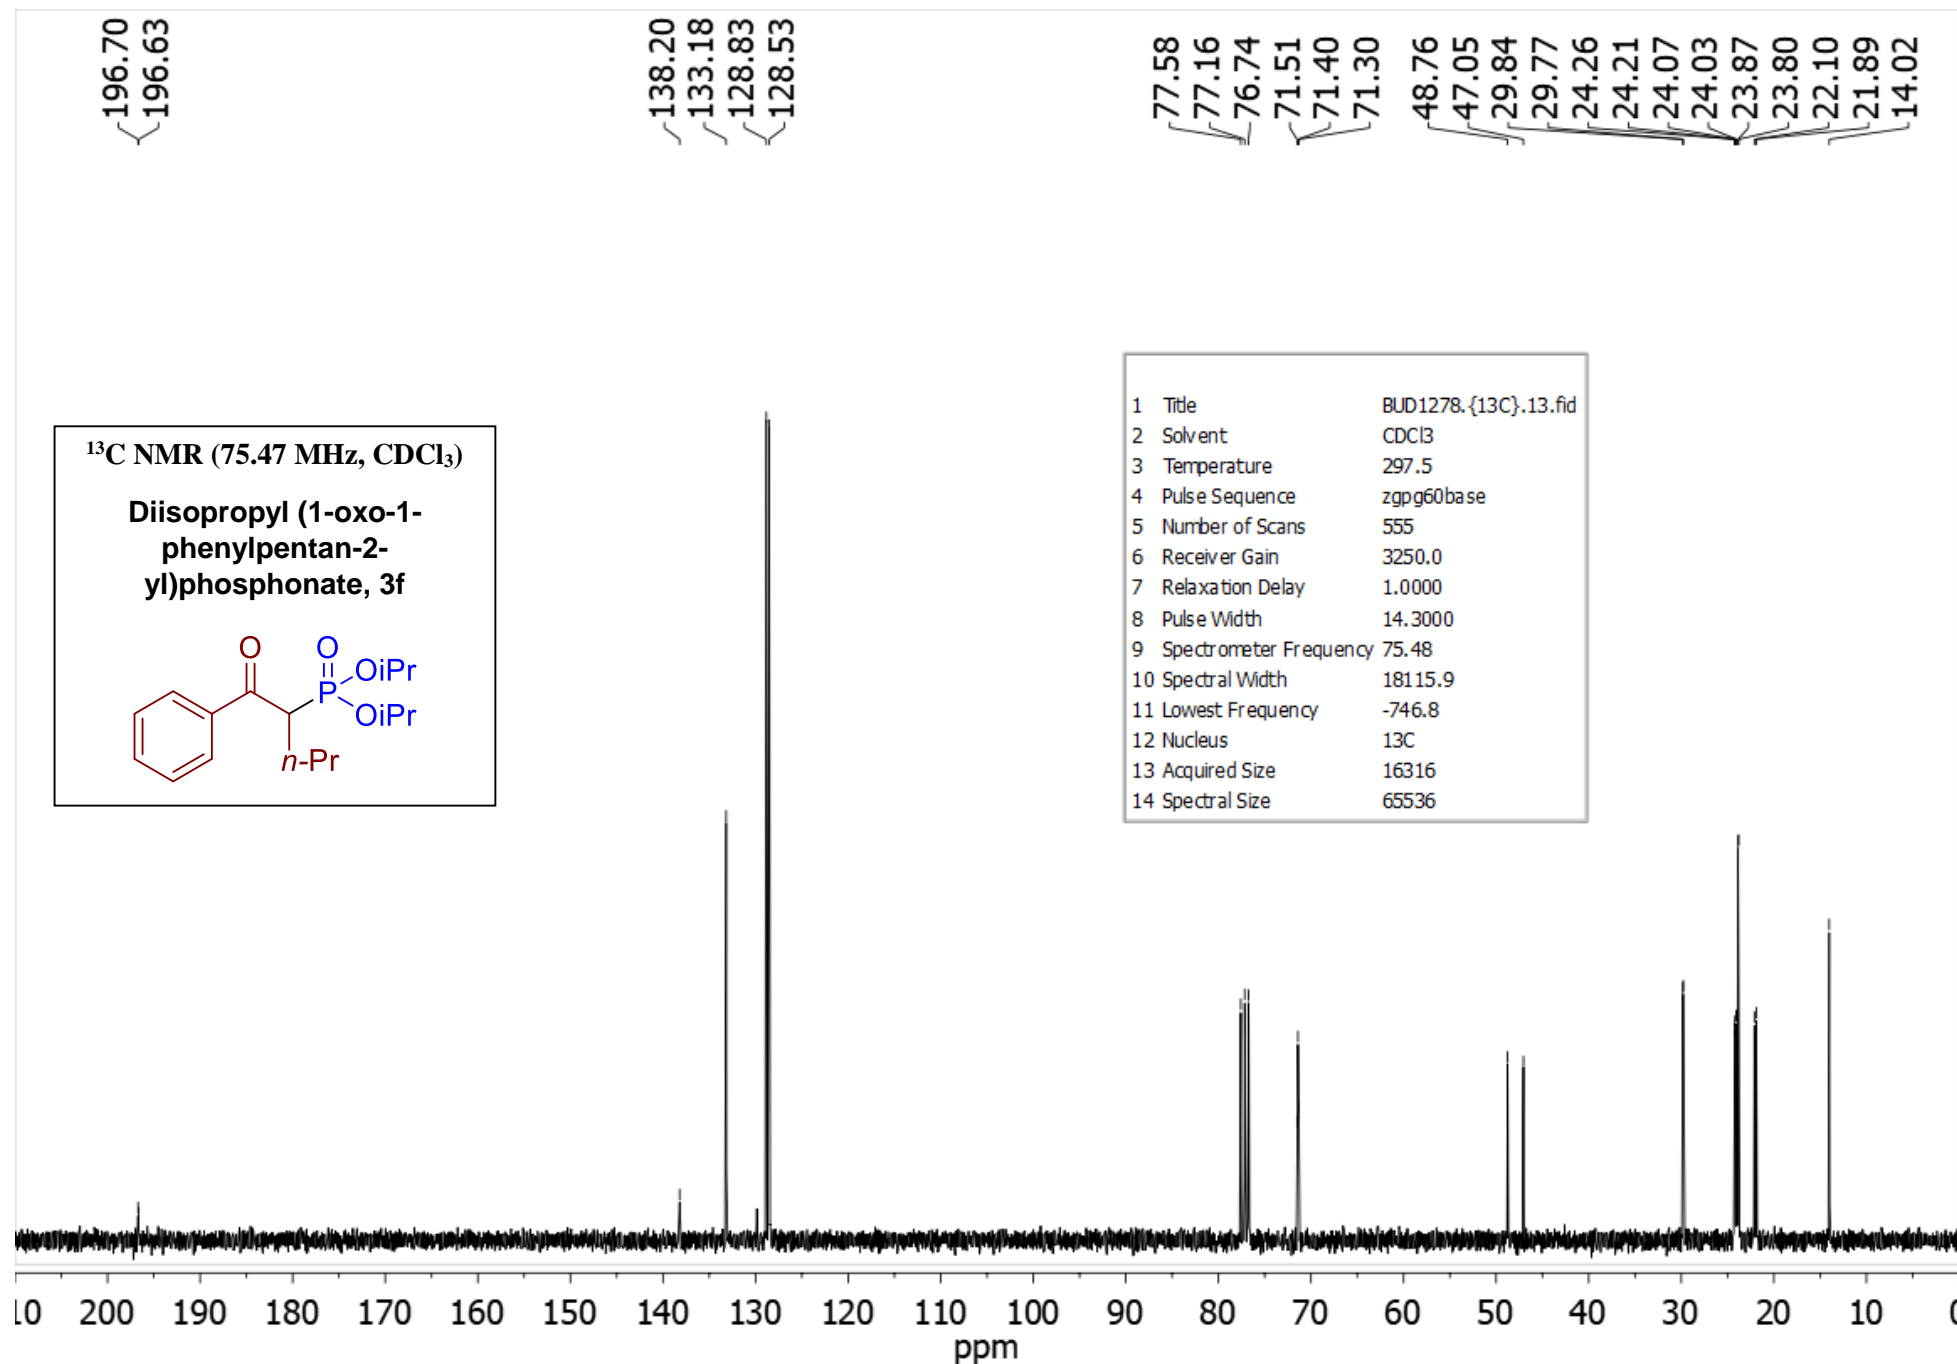

**<sup>31</sup>P NMR (121.49 MHz, CDCl<sub>3</sub>)**

**Diisopropyl (1-oxo-1-phenylpentan-2-yl)phosphonate, 3f**

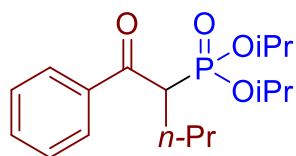

—21.40

|    |                        |                      |
|----|------------------------|----------------------|
| 1  | Title                  | BUD1278.{31P}.31.fid |
| 2  | Solvent                | CDCl <sub>3</sub>    |
| 3  | Temperature            | 297.8                |
| 4  | Pulse Sequence         | zgpg30               |
| 5  | Number of Scans        | 51                   |
| 6  | Receiver Gain          | 2050.0               |
| 7  | Relaxation Delay       | 2.0000               |
| 8  | Pulse Width            | 14.7000              |
| 9  | Spectrometer Frequency | 121.49               |
| 10 | Spectral Width         | 96153.8              |
| 11 | Lowest Frequency       | -54043.6             |
| 12 | Nucleus                | 31P                  |
| 13 | Acquired Size          | 32700                |
| 14 | Spectral Size          | 65536                |

300 250 200 150 100 50 0 -50 -100 -150 -200 -250 -300 -350 -400  
ppm



<sup>1</sup>H NMR (300.13 MHz, CDCl<sub>3</sub>)

Diisopropyl (2-(4-fluorophenyl)-2-oxoethyl)phosphonate, 3g

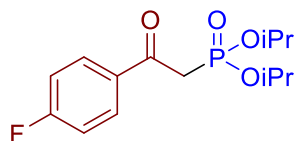

|                          |                   |
|--------------------------|-------------------|
| 1 Title                  | BUD687.{1H}.1.fid |
| 2 Solvent                | CDCl <sub>3</sub> |
| 3 Temperature            | 298.0             |
| 4 Pulse Sequence         | zg                |
| 5 Number of Scans        | 1                 |
| 6 Receiver Gain          | 32.0              |
| 7 Relaxation Delay       | 0.1000            |
| 8 Pulse Width            | 14.7000           |
| 9 Spectrometer Frequency | 300.23            |
| 10 Spectral Width        | 5882.4            |
| 11 Lowest Frequency      | -1094.5           |
| 12 Nucleus               | <sup>1</sup> H    |
| 13 Acquired Size         | 16308             |
| 14 Spectral Size         | 65536             |

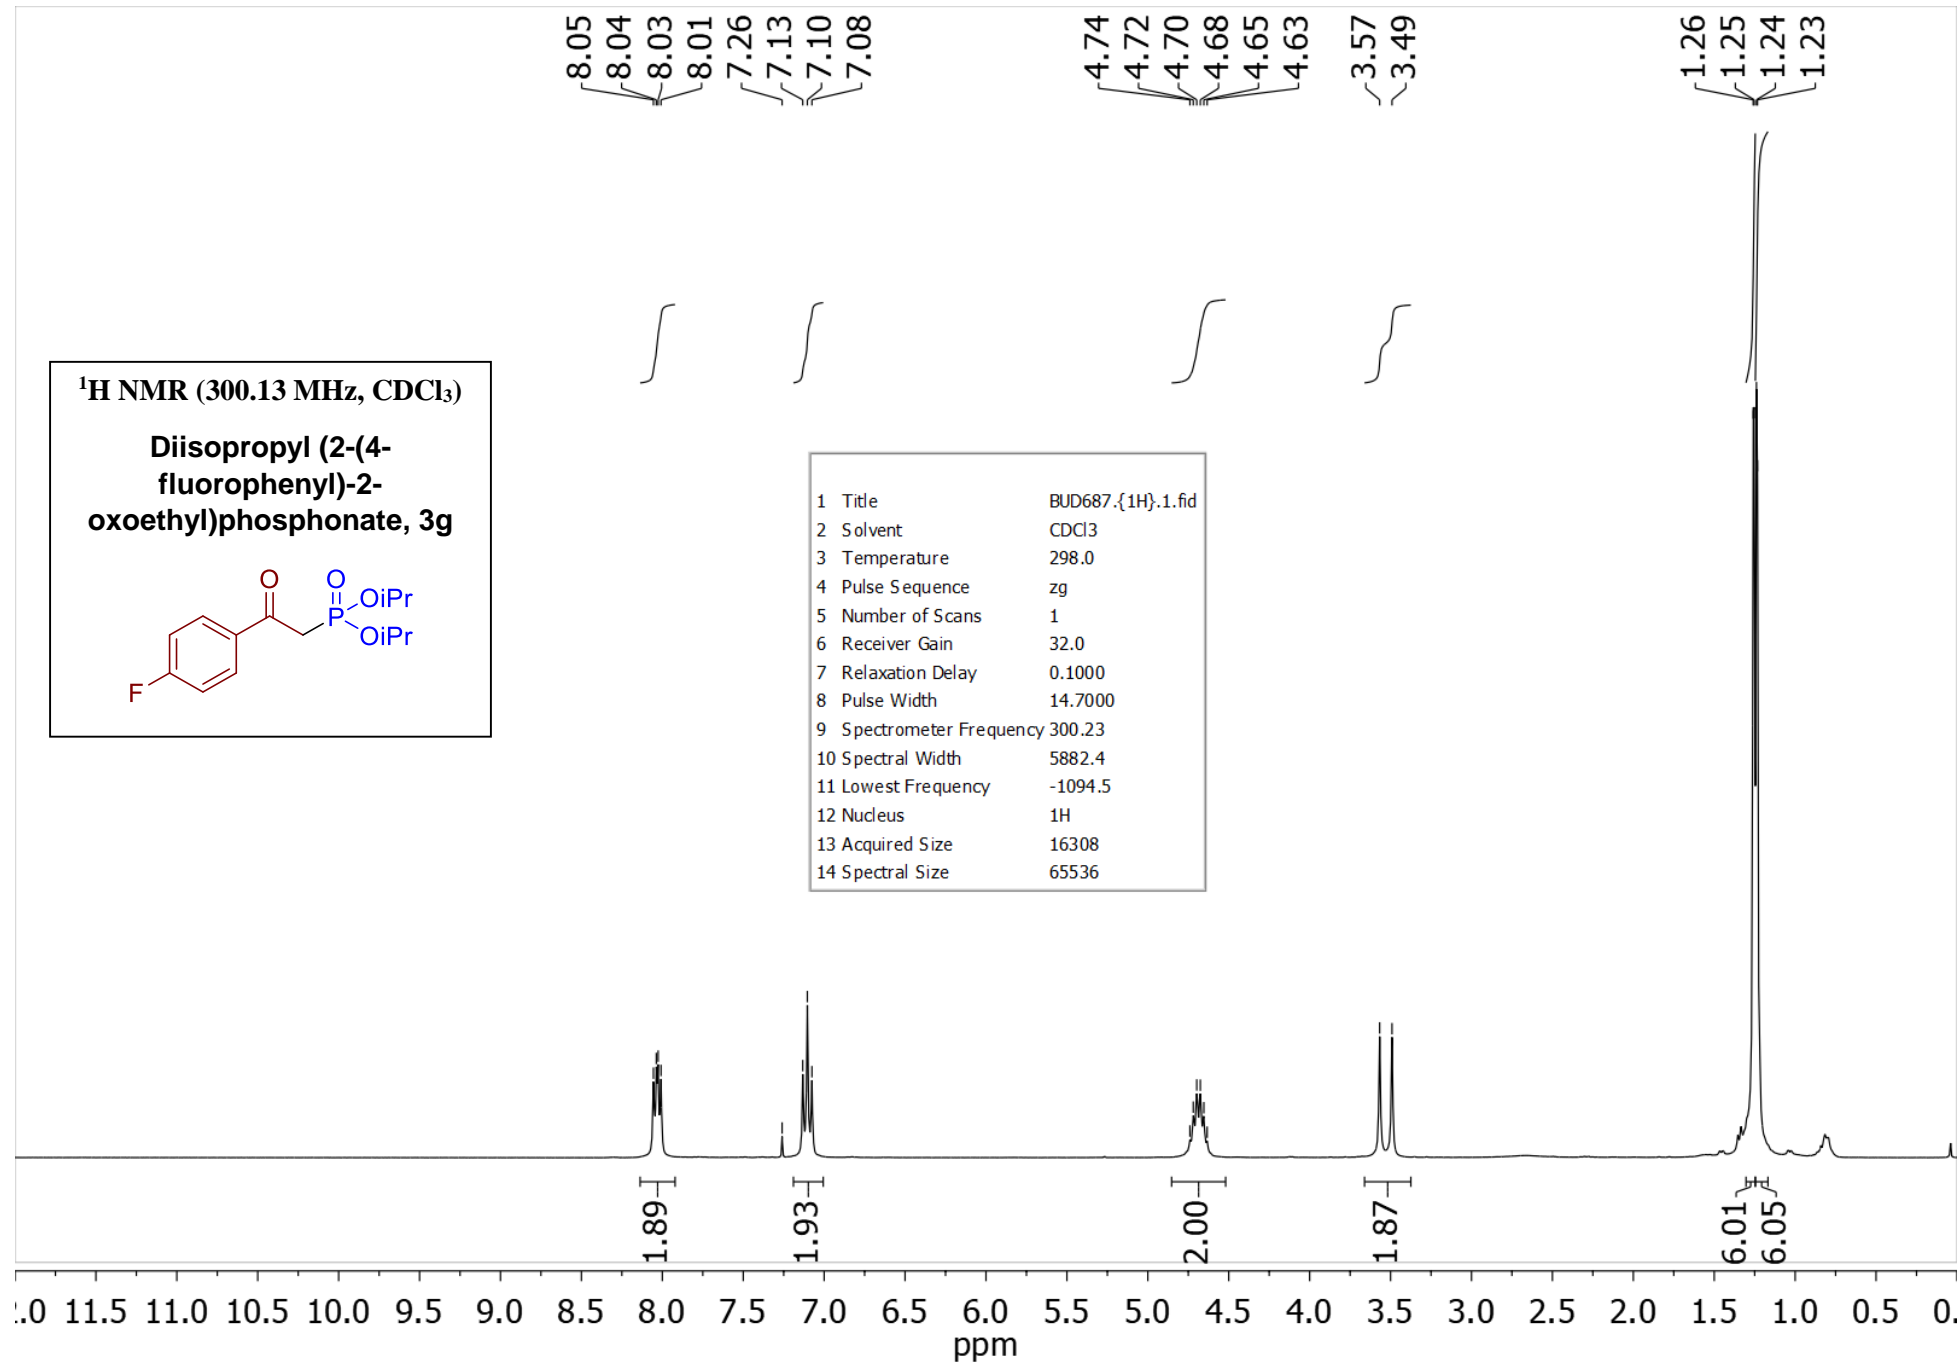

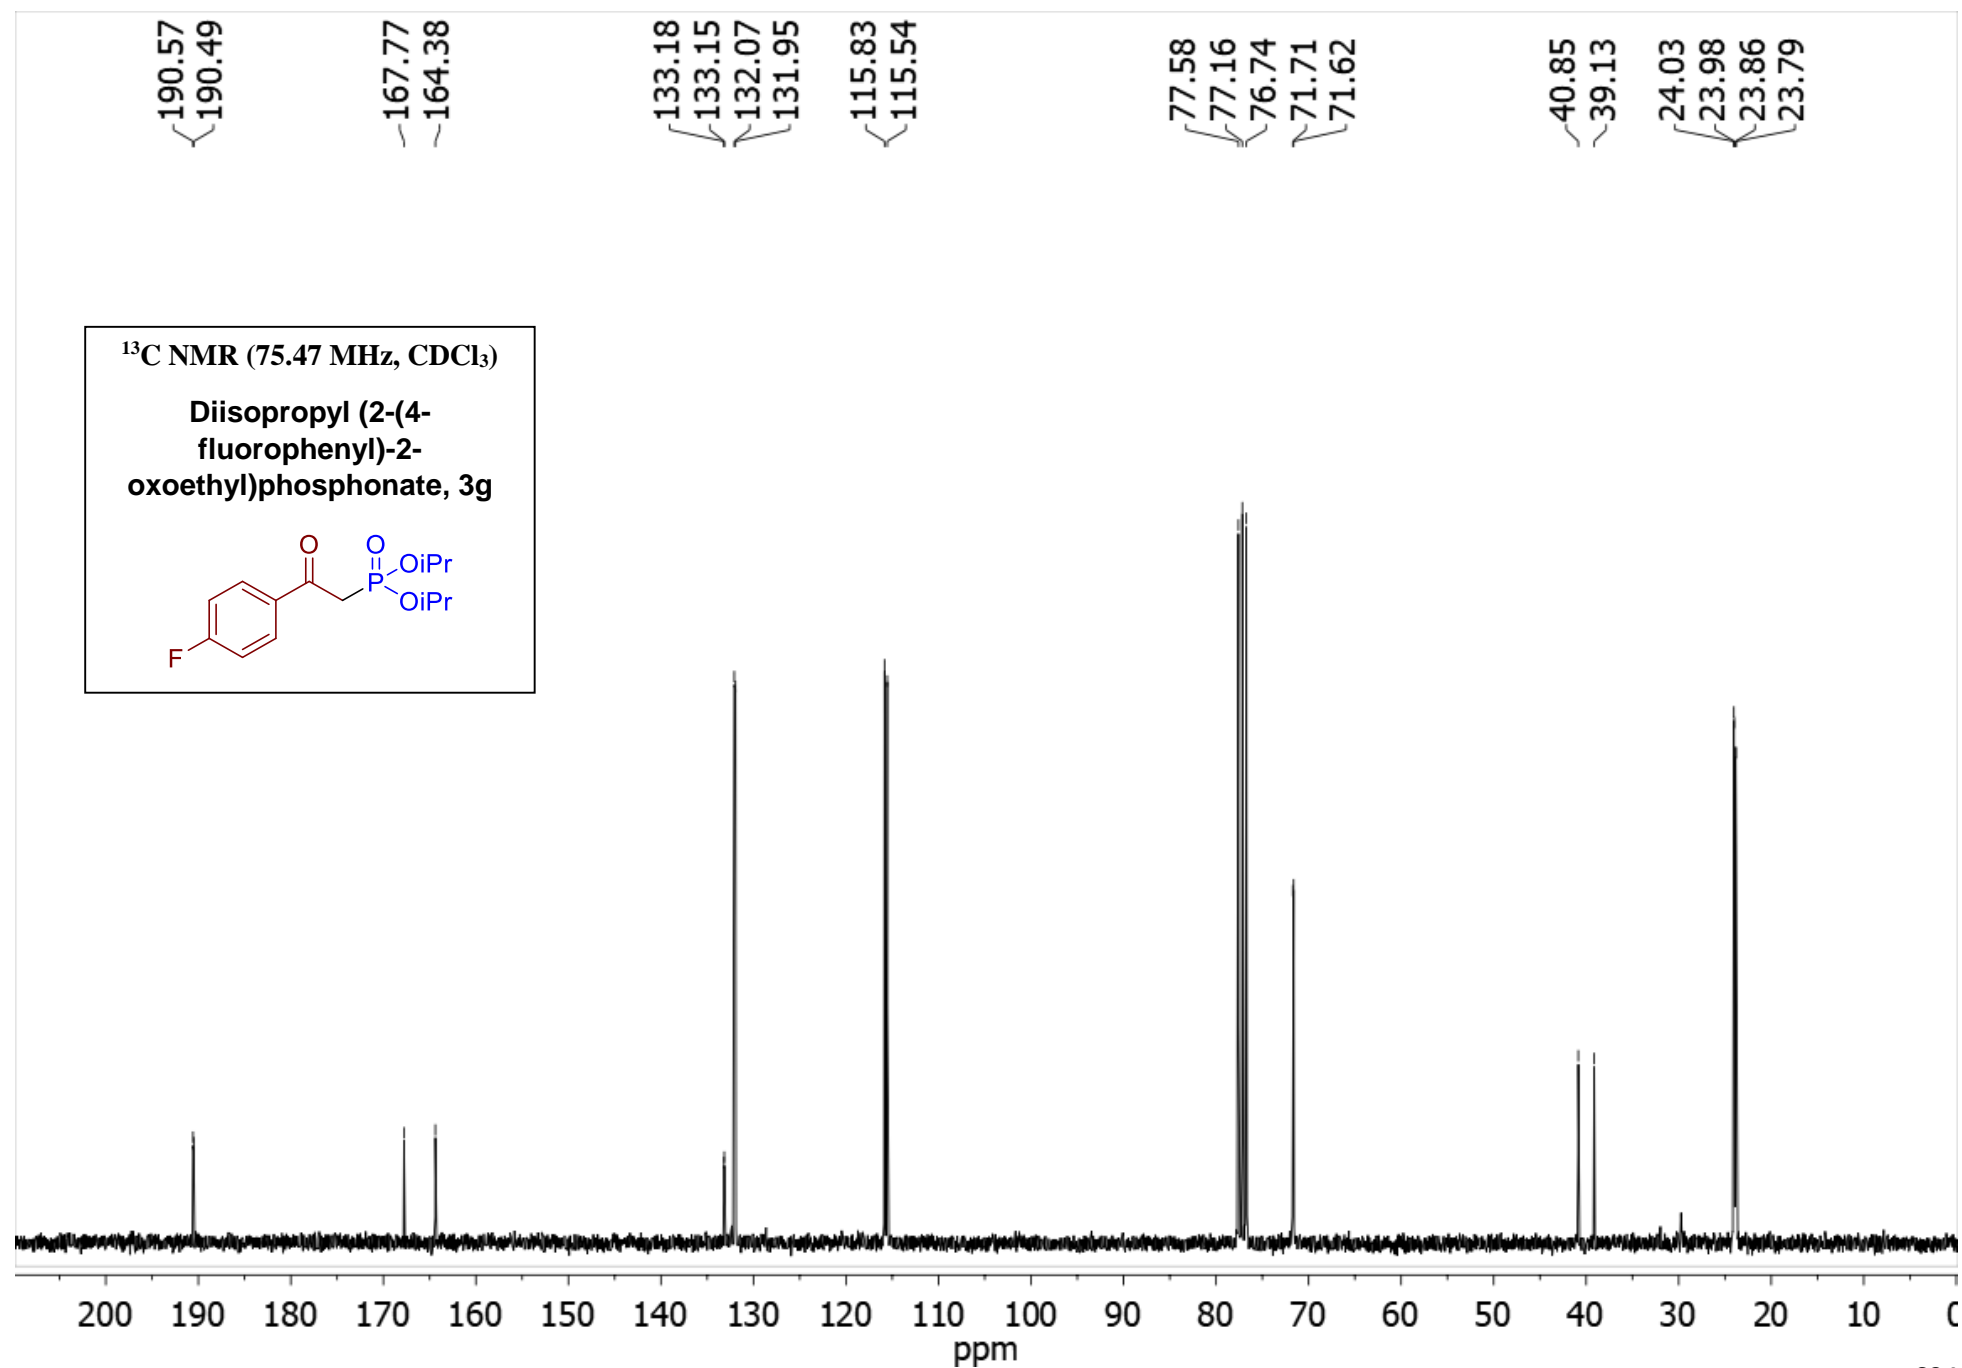

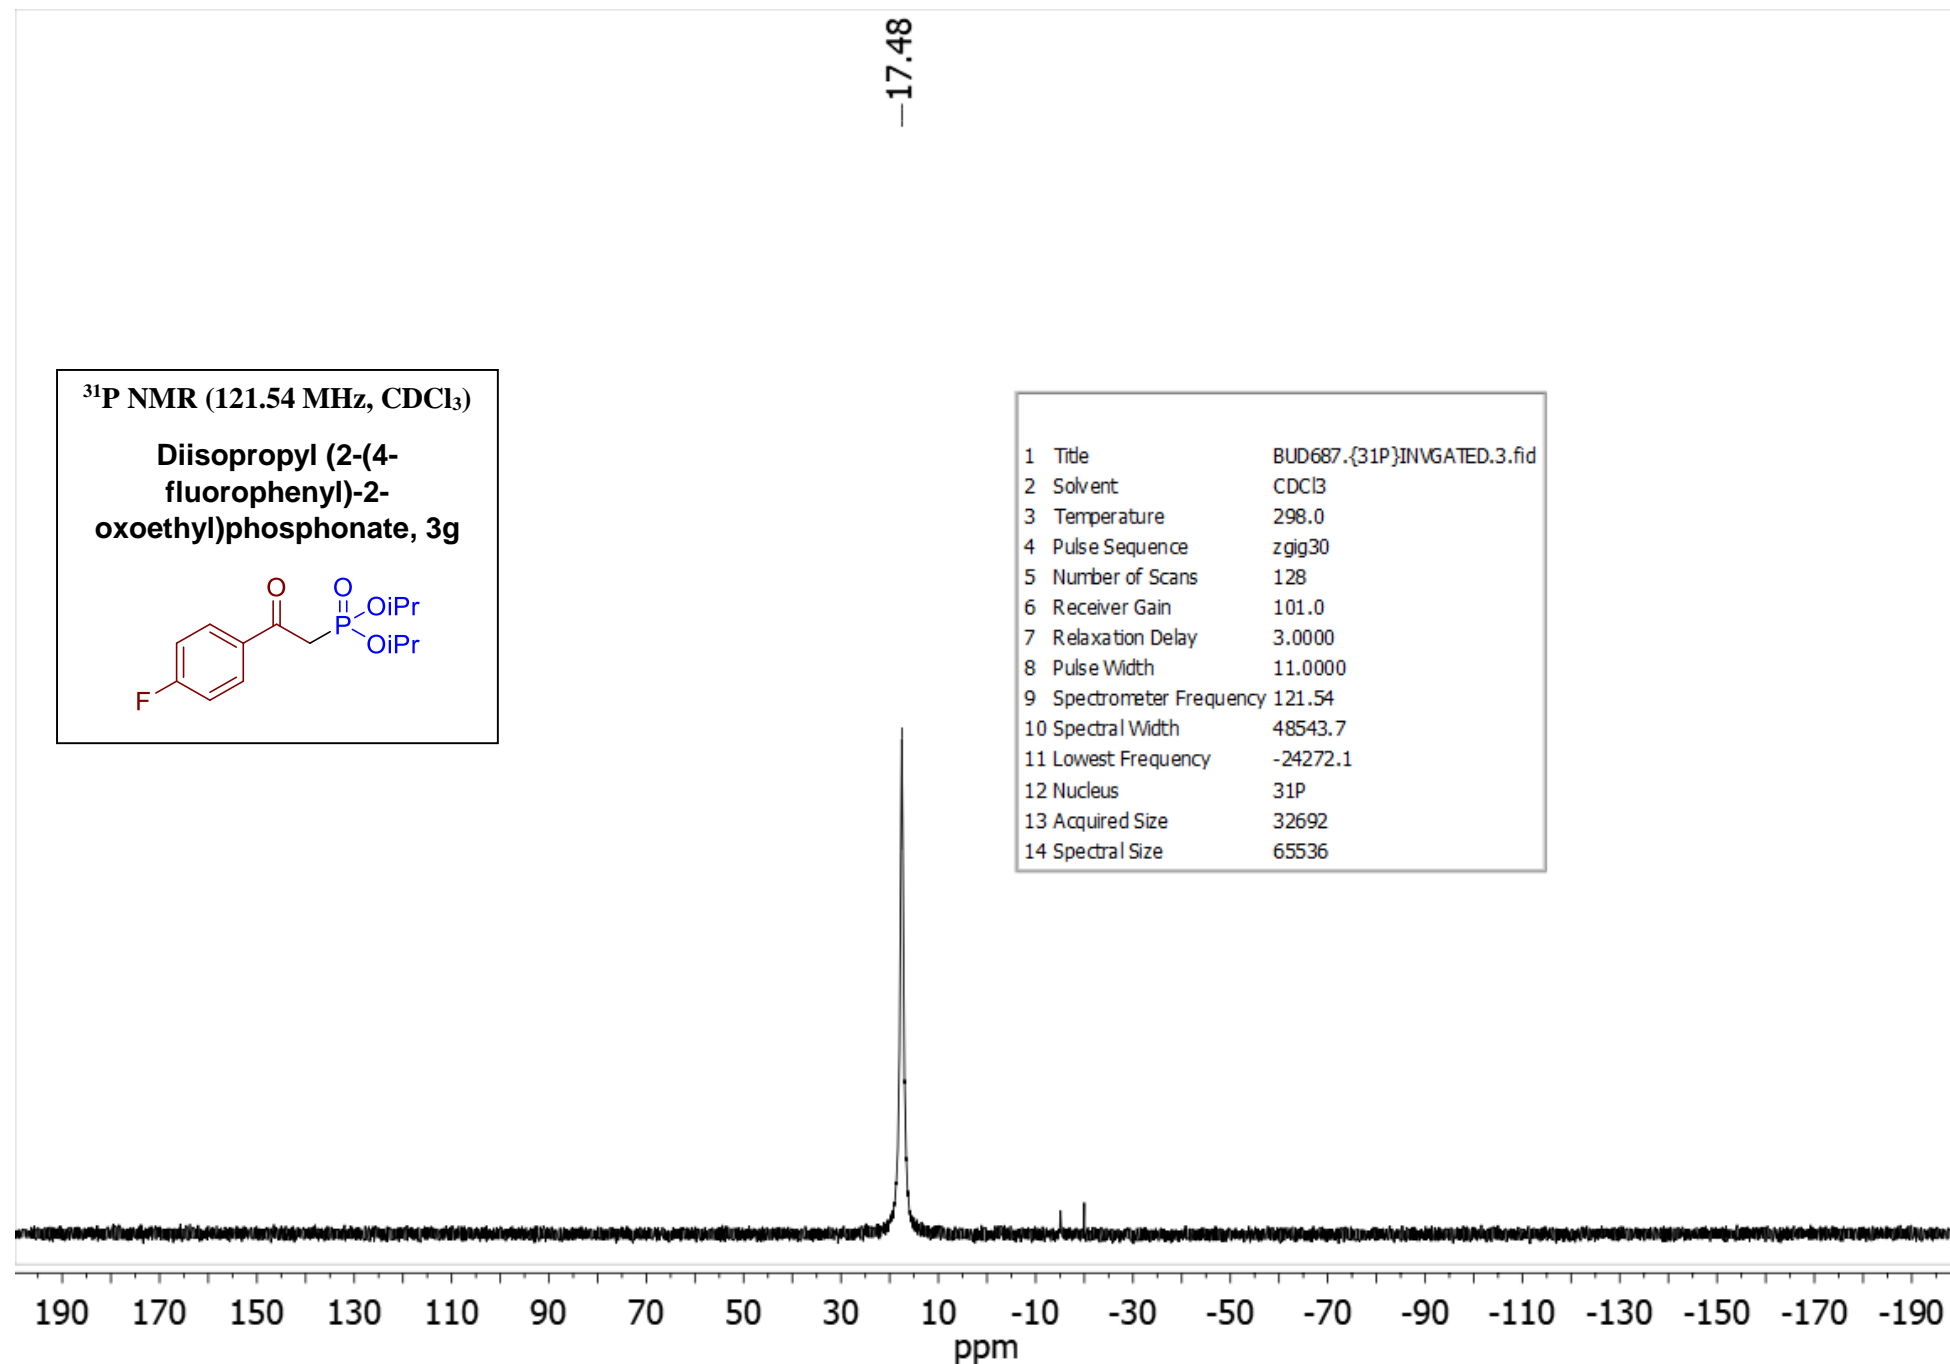

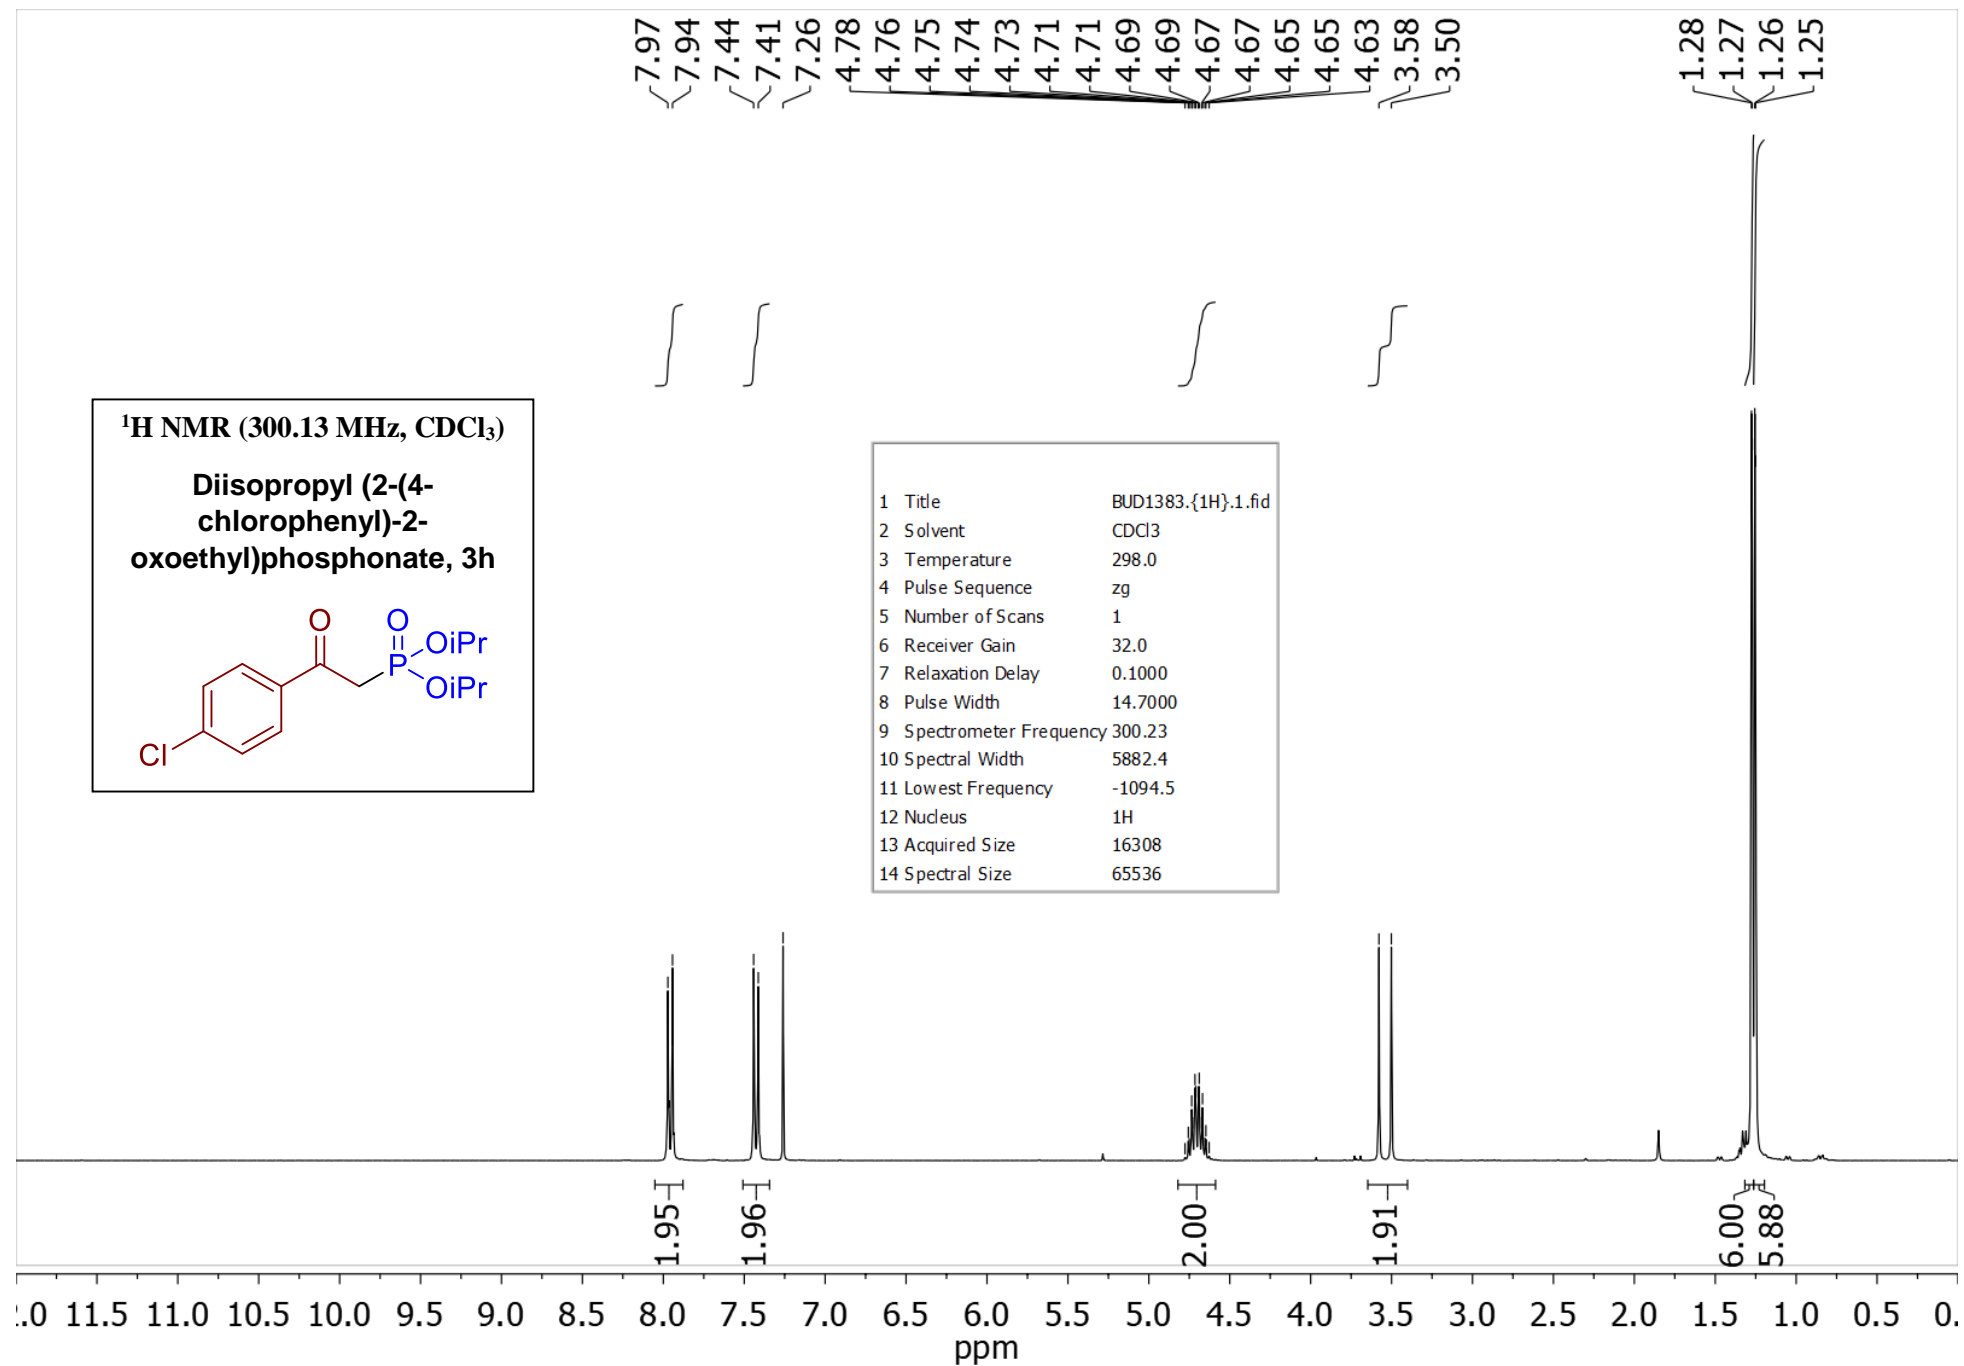

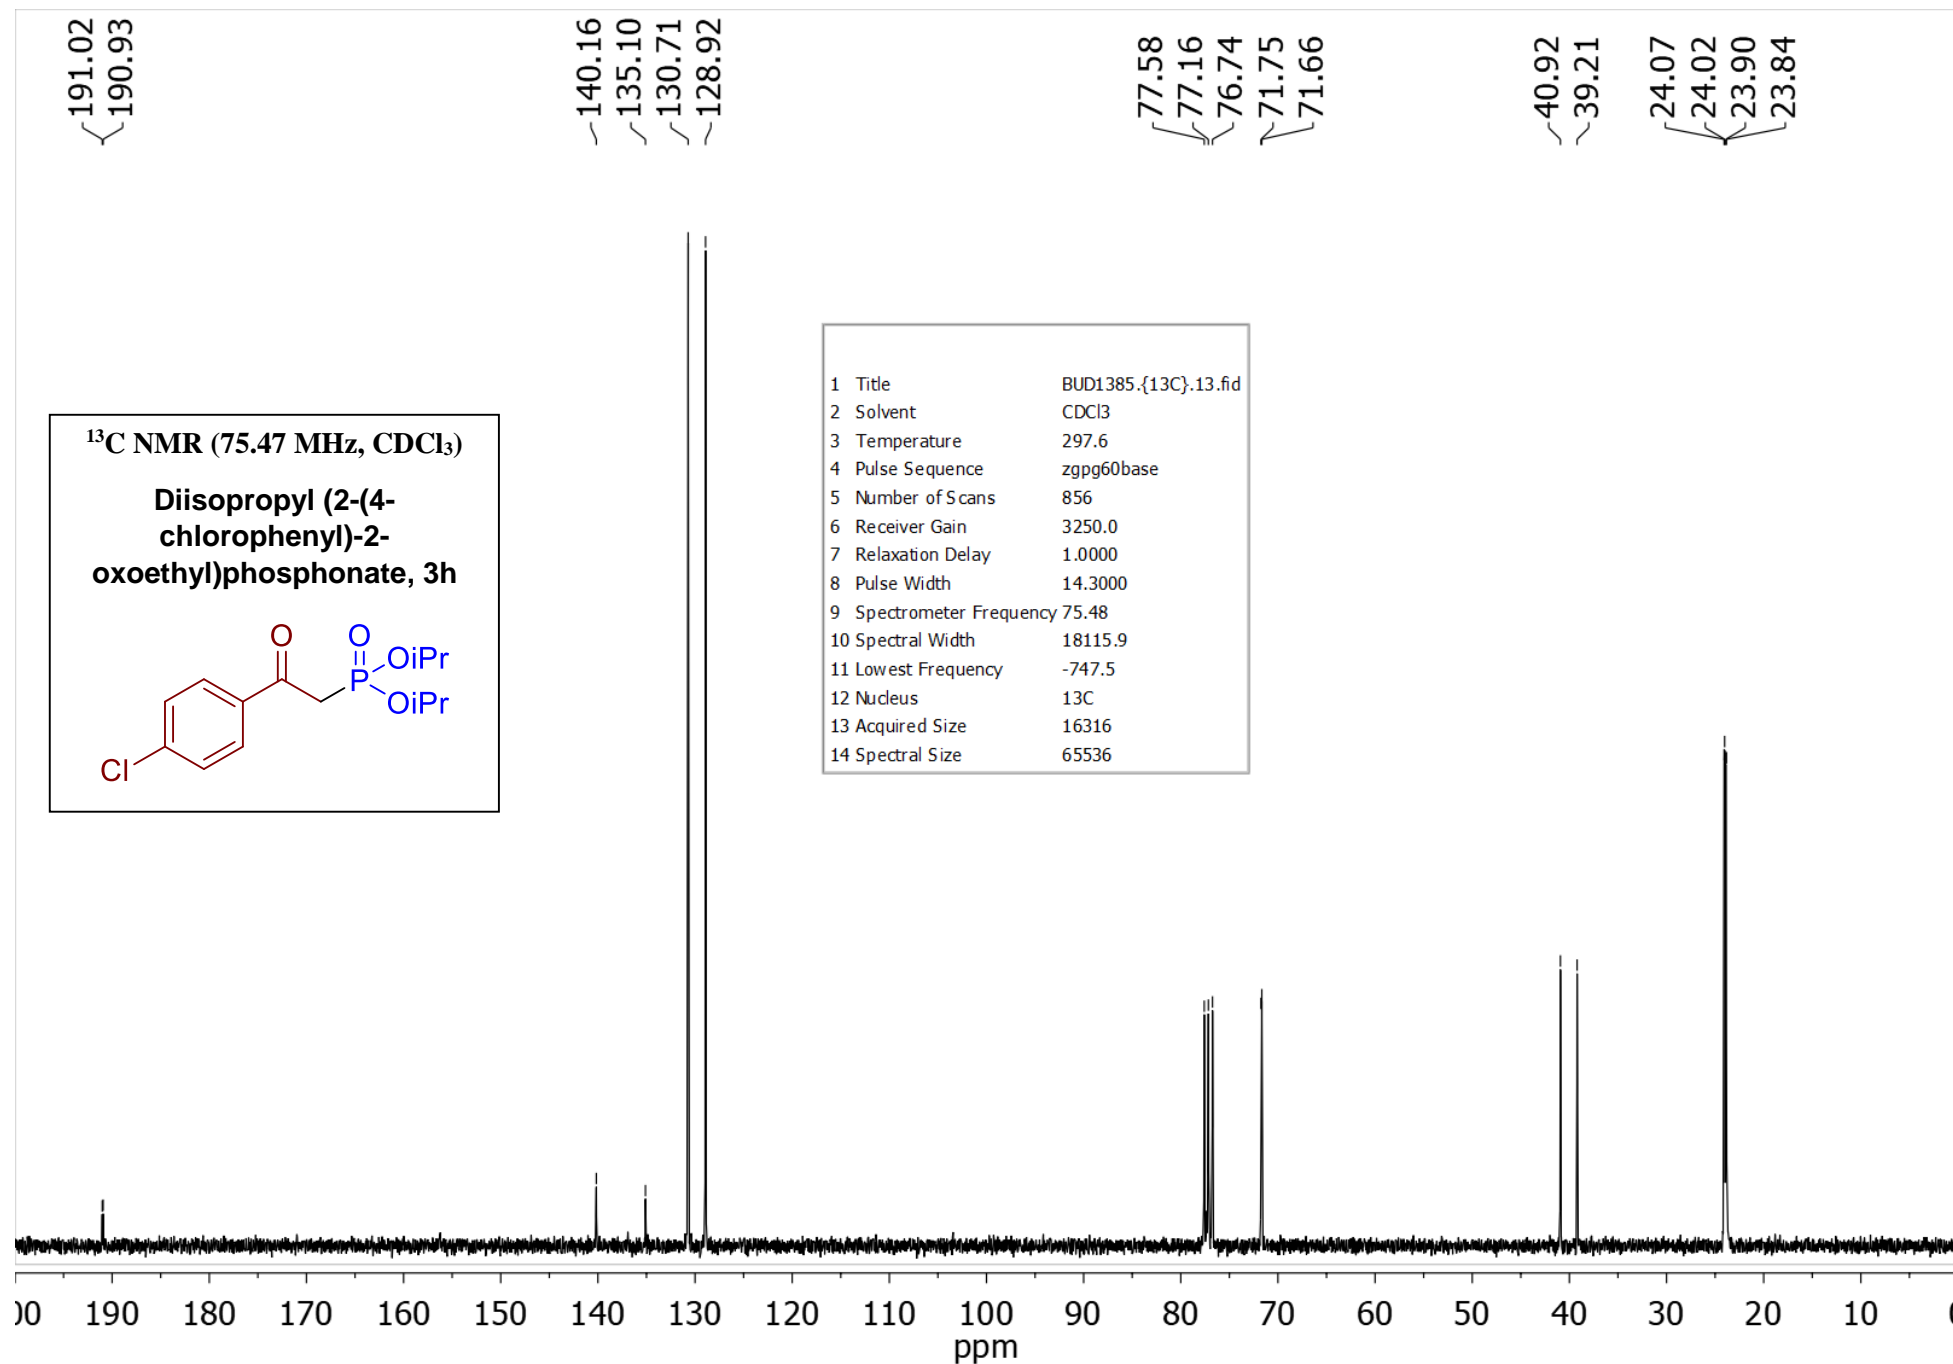

<sup>31</sup>P NMR (121.49 MHz, CDCl<sub>3</sub>)

**Diisopropyl (2-(4-chlorophenyl)-2-oxoethyl)phosphonate, 3h**

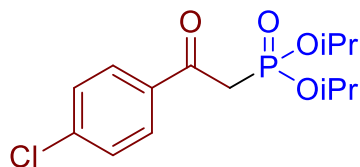

-18.07

|    |                        |                      |
|----|------------------------|----------------------|
| 1  | Title                  | BUD1384.{31P}.31.fid |
| 2  | Solvent                | CDCl3                |
| 3  | Temperature            | 297.8                |
| 4  | Pulse Sequence         | zgpg30               |
| 5  | Number of Scans        | 464                  |
| 6  | Receiver Gain          | 2050.0               |
| 7  | Relaxation Delay       | 2.0000               |
| 8  | Pulse Width            | 14.7000              |
| 9  | Spectrometer Frequency | 121.49               |
| 10 | Spectral Width         | 96153.8              |
| 11 | Lowest Frequency       | -54043.6             |
| 12 | Nucleus                | 31P                  |
| 13 | Acquired Size          | 32700                |
| 14 | Spectral Size          | 65536                |

300 250 200 150 100 50 0 -50 -100 -150 -200 -250 -300 -350 -400  
ppm

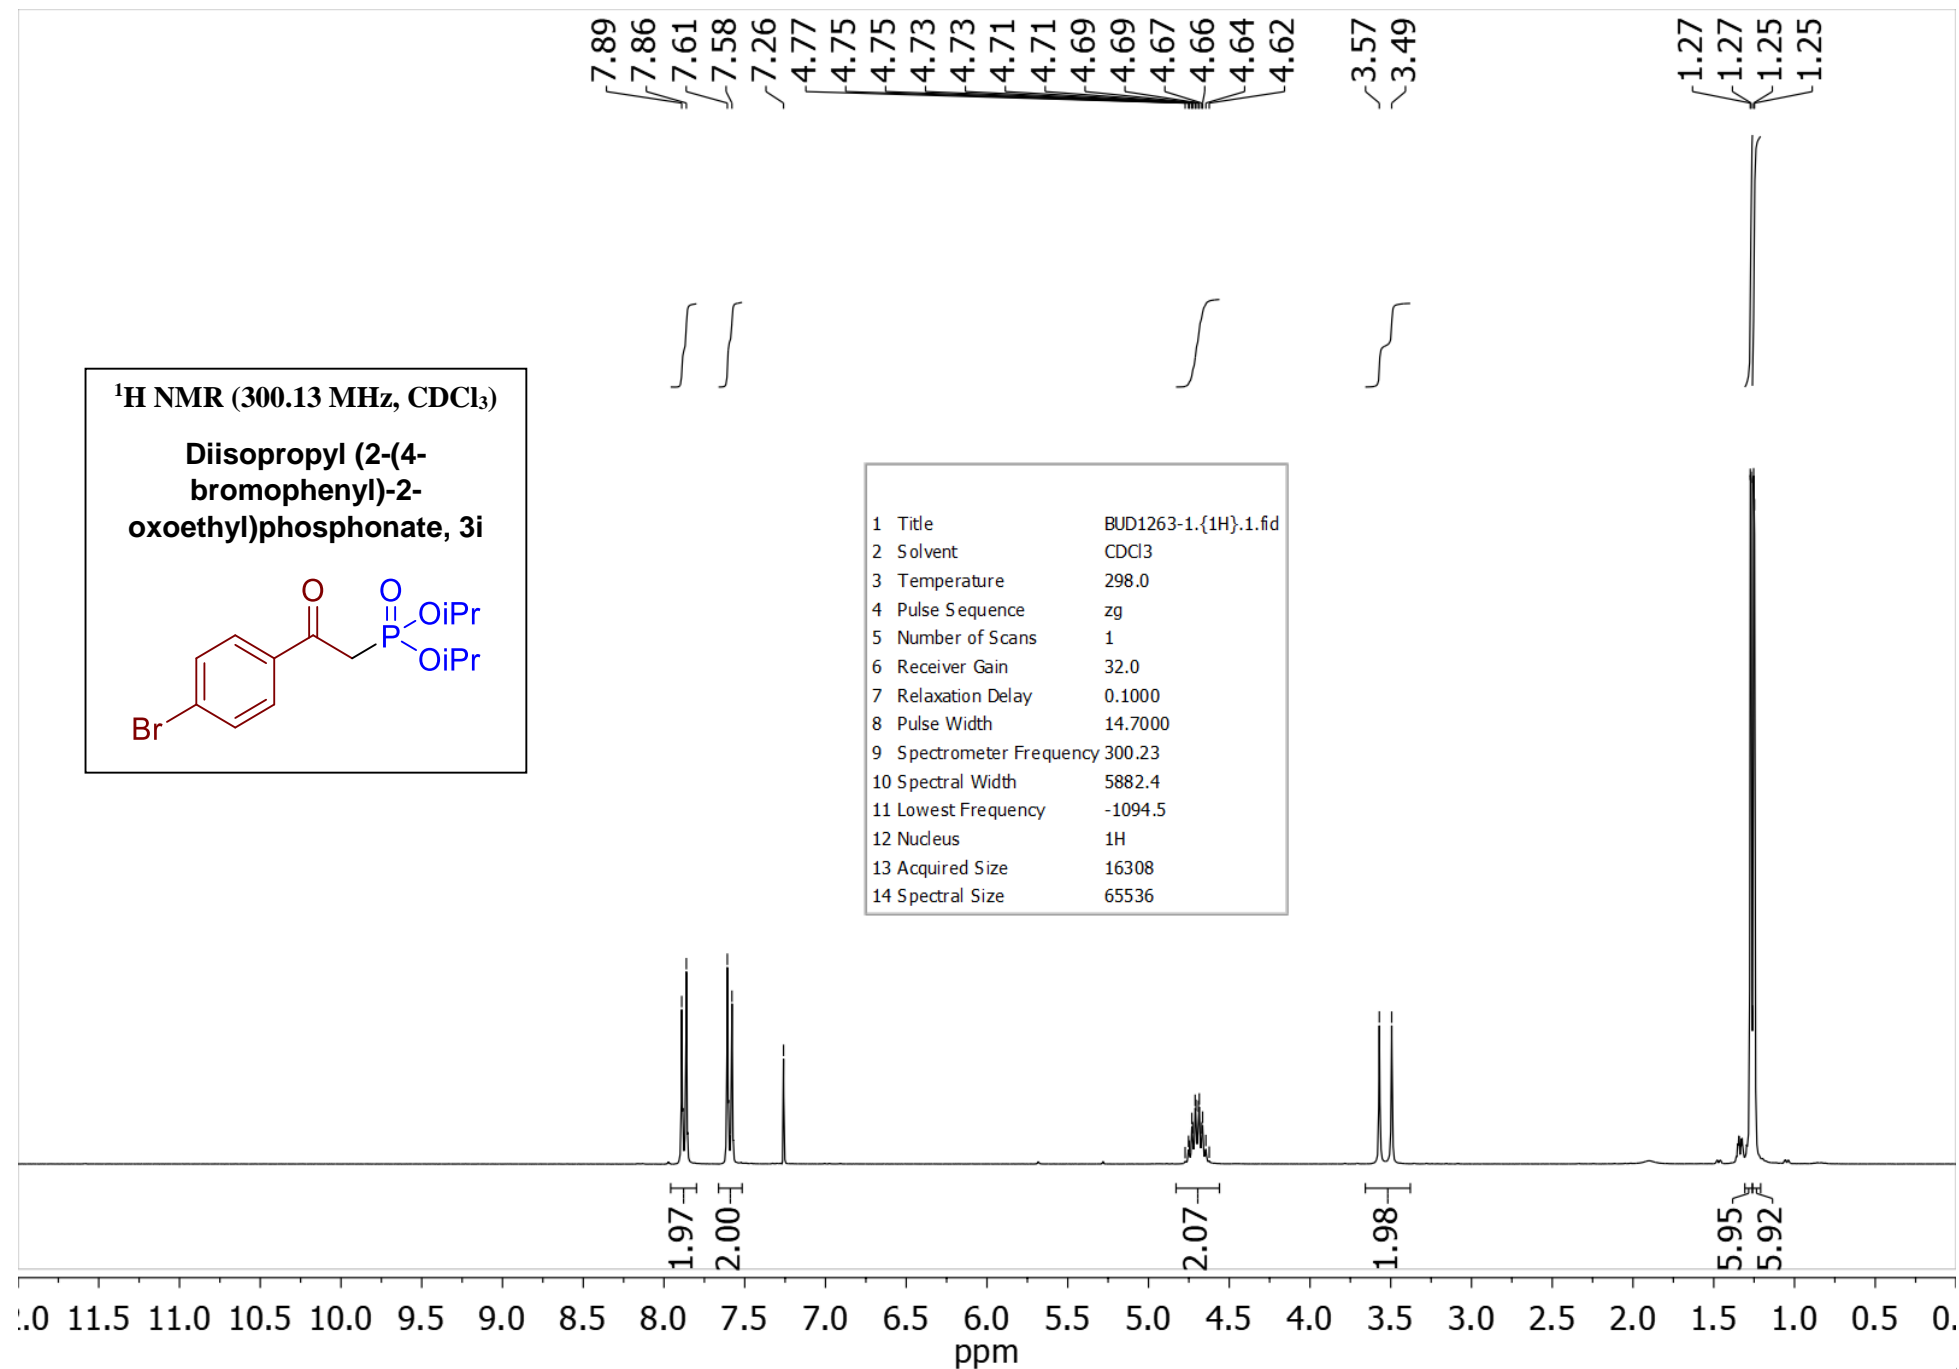

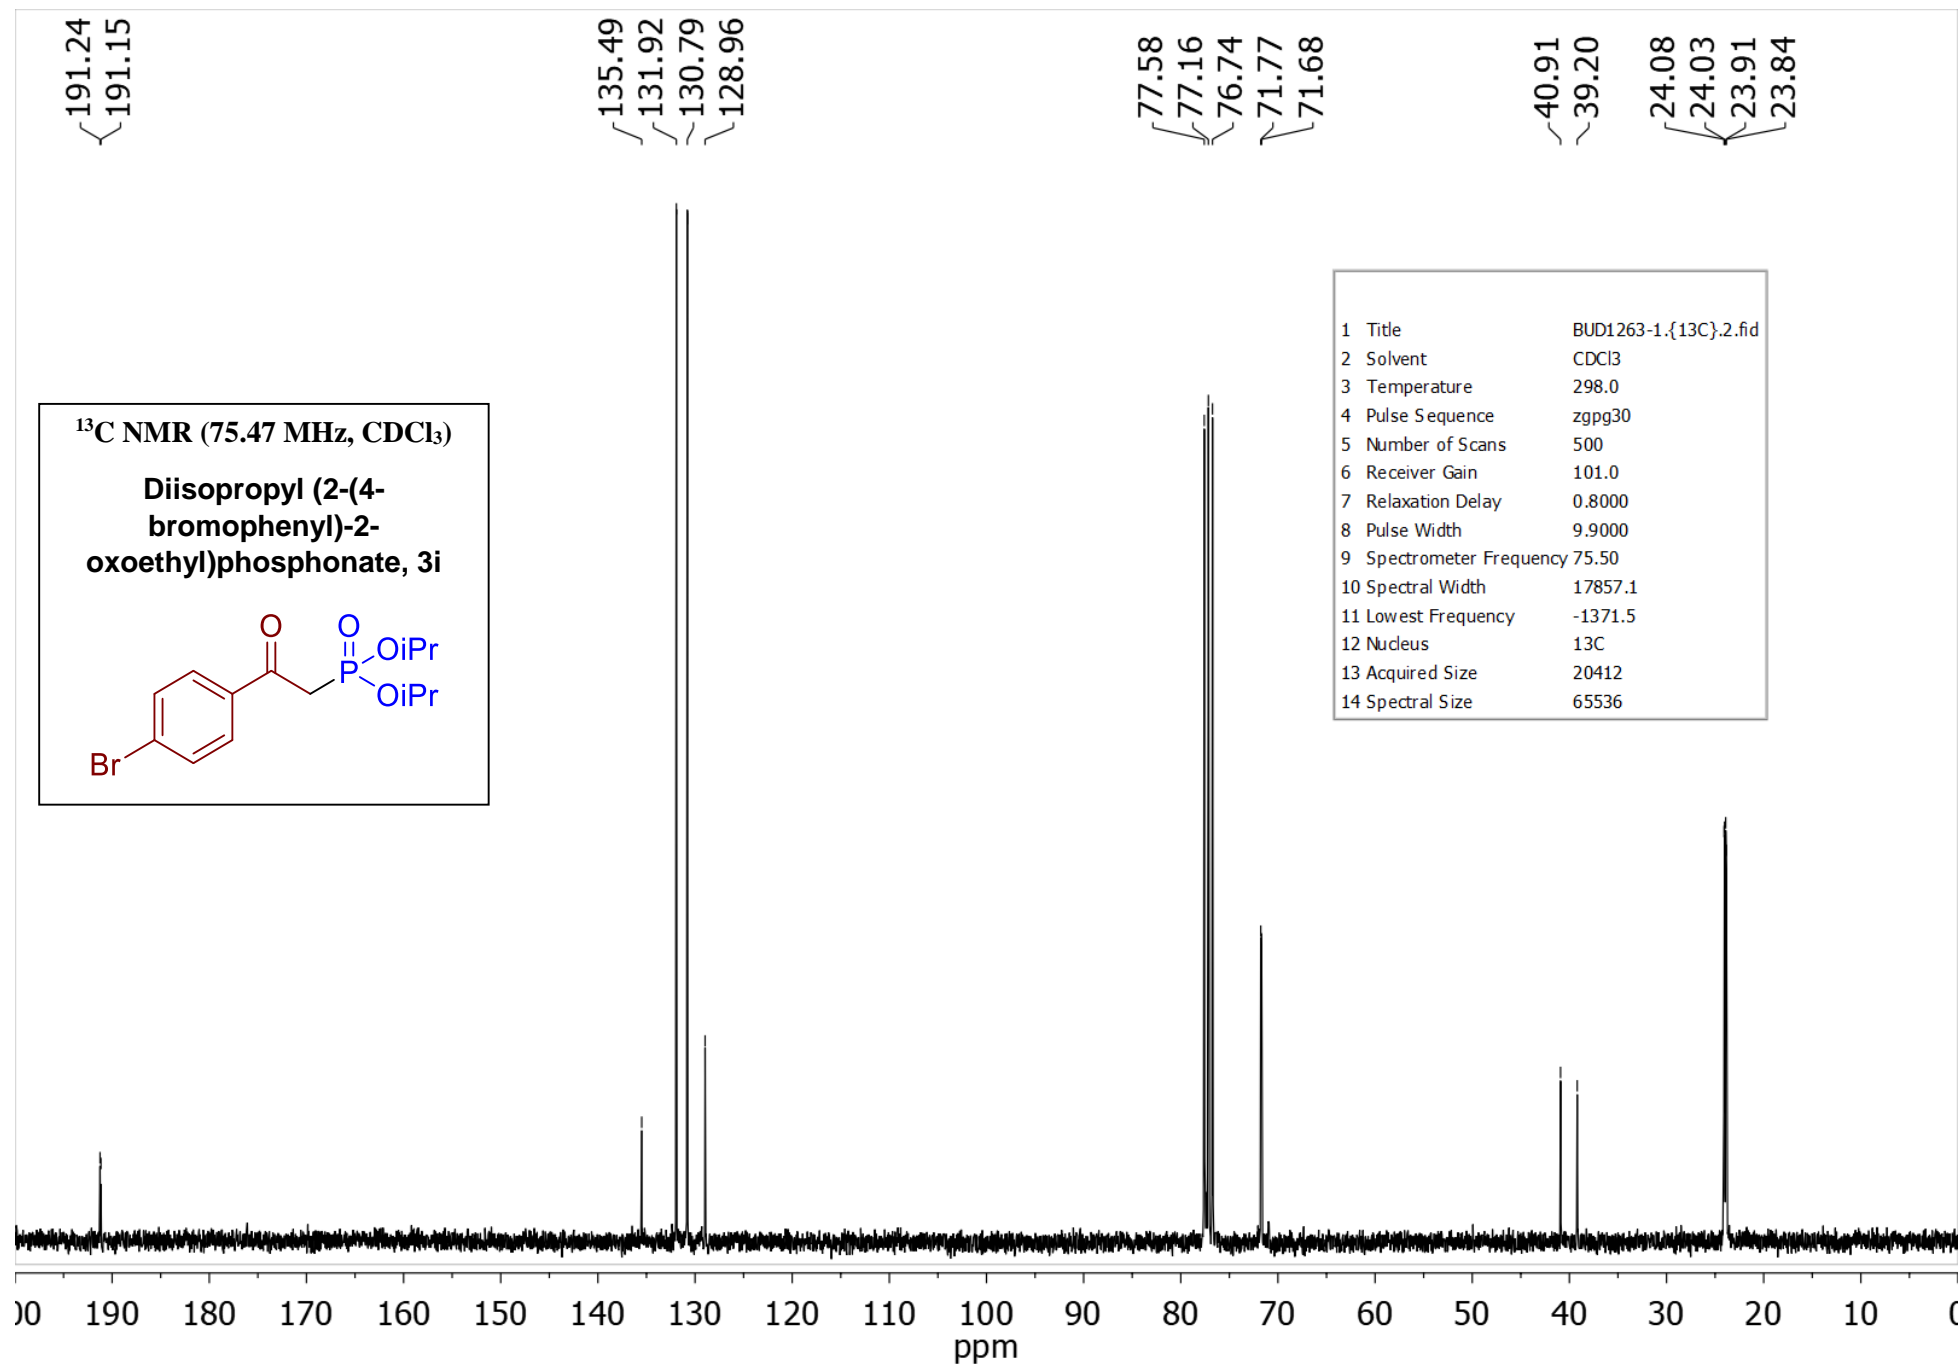



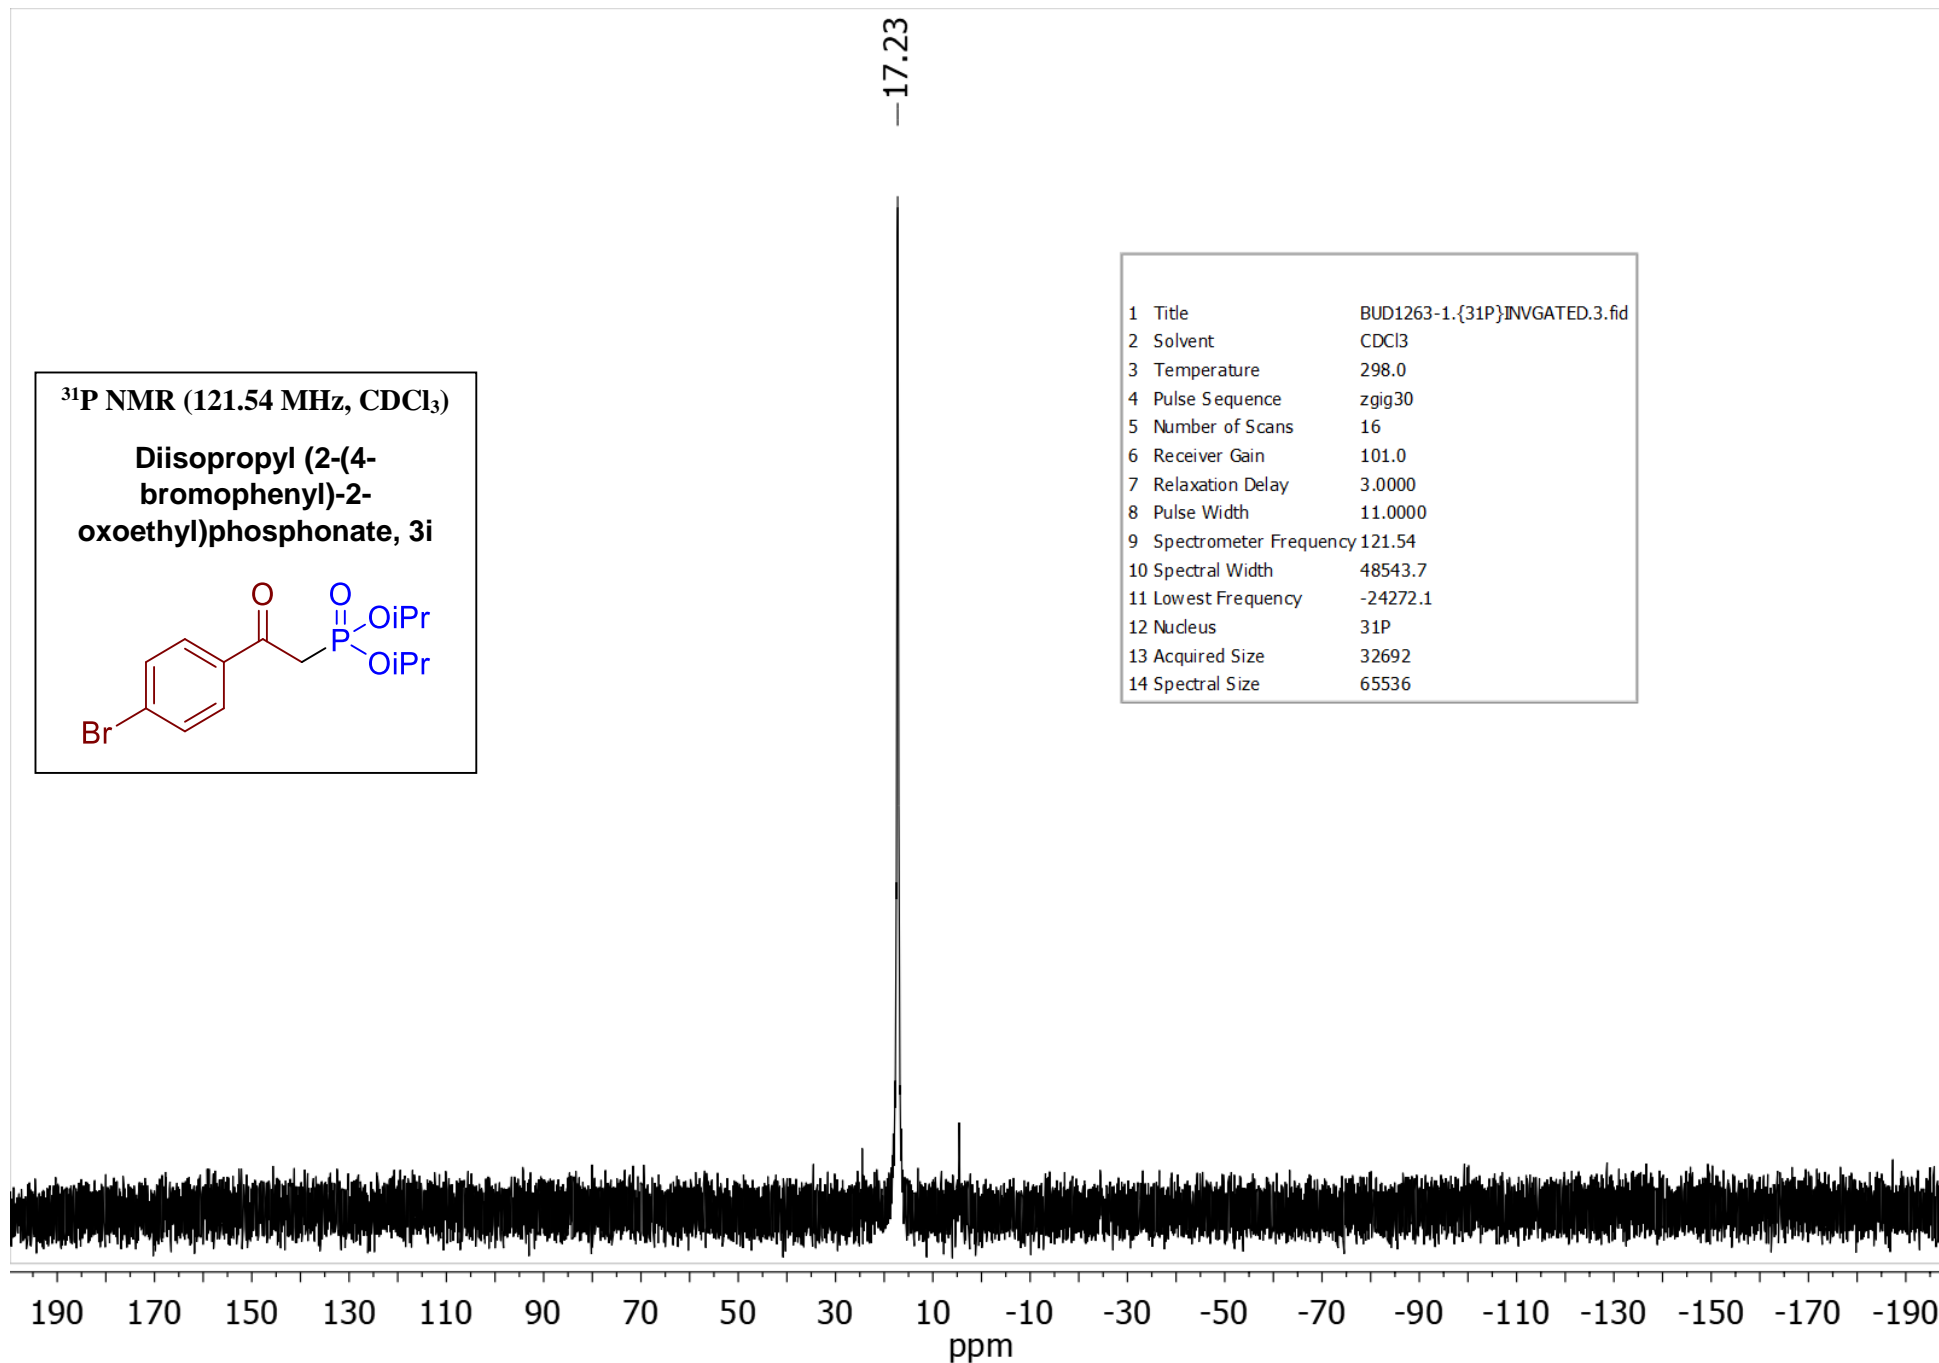

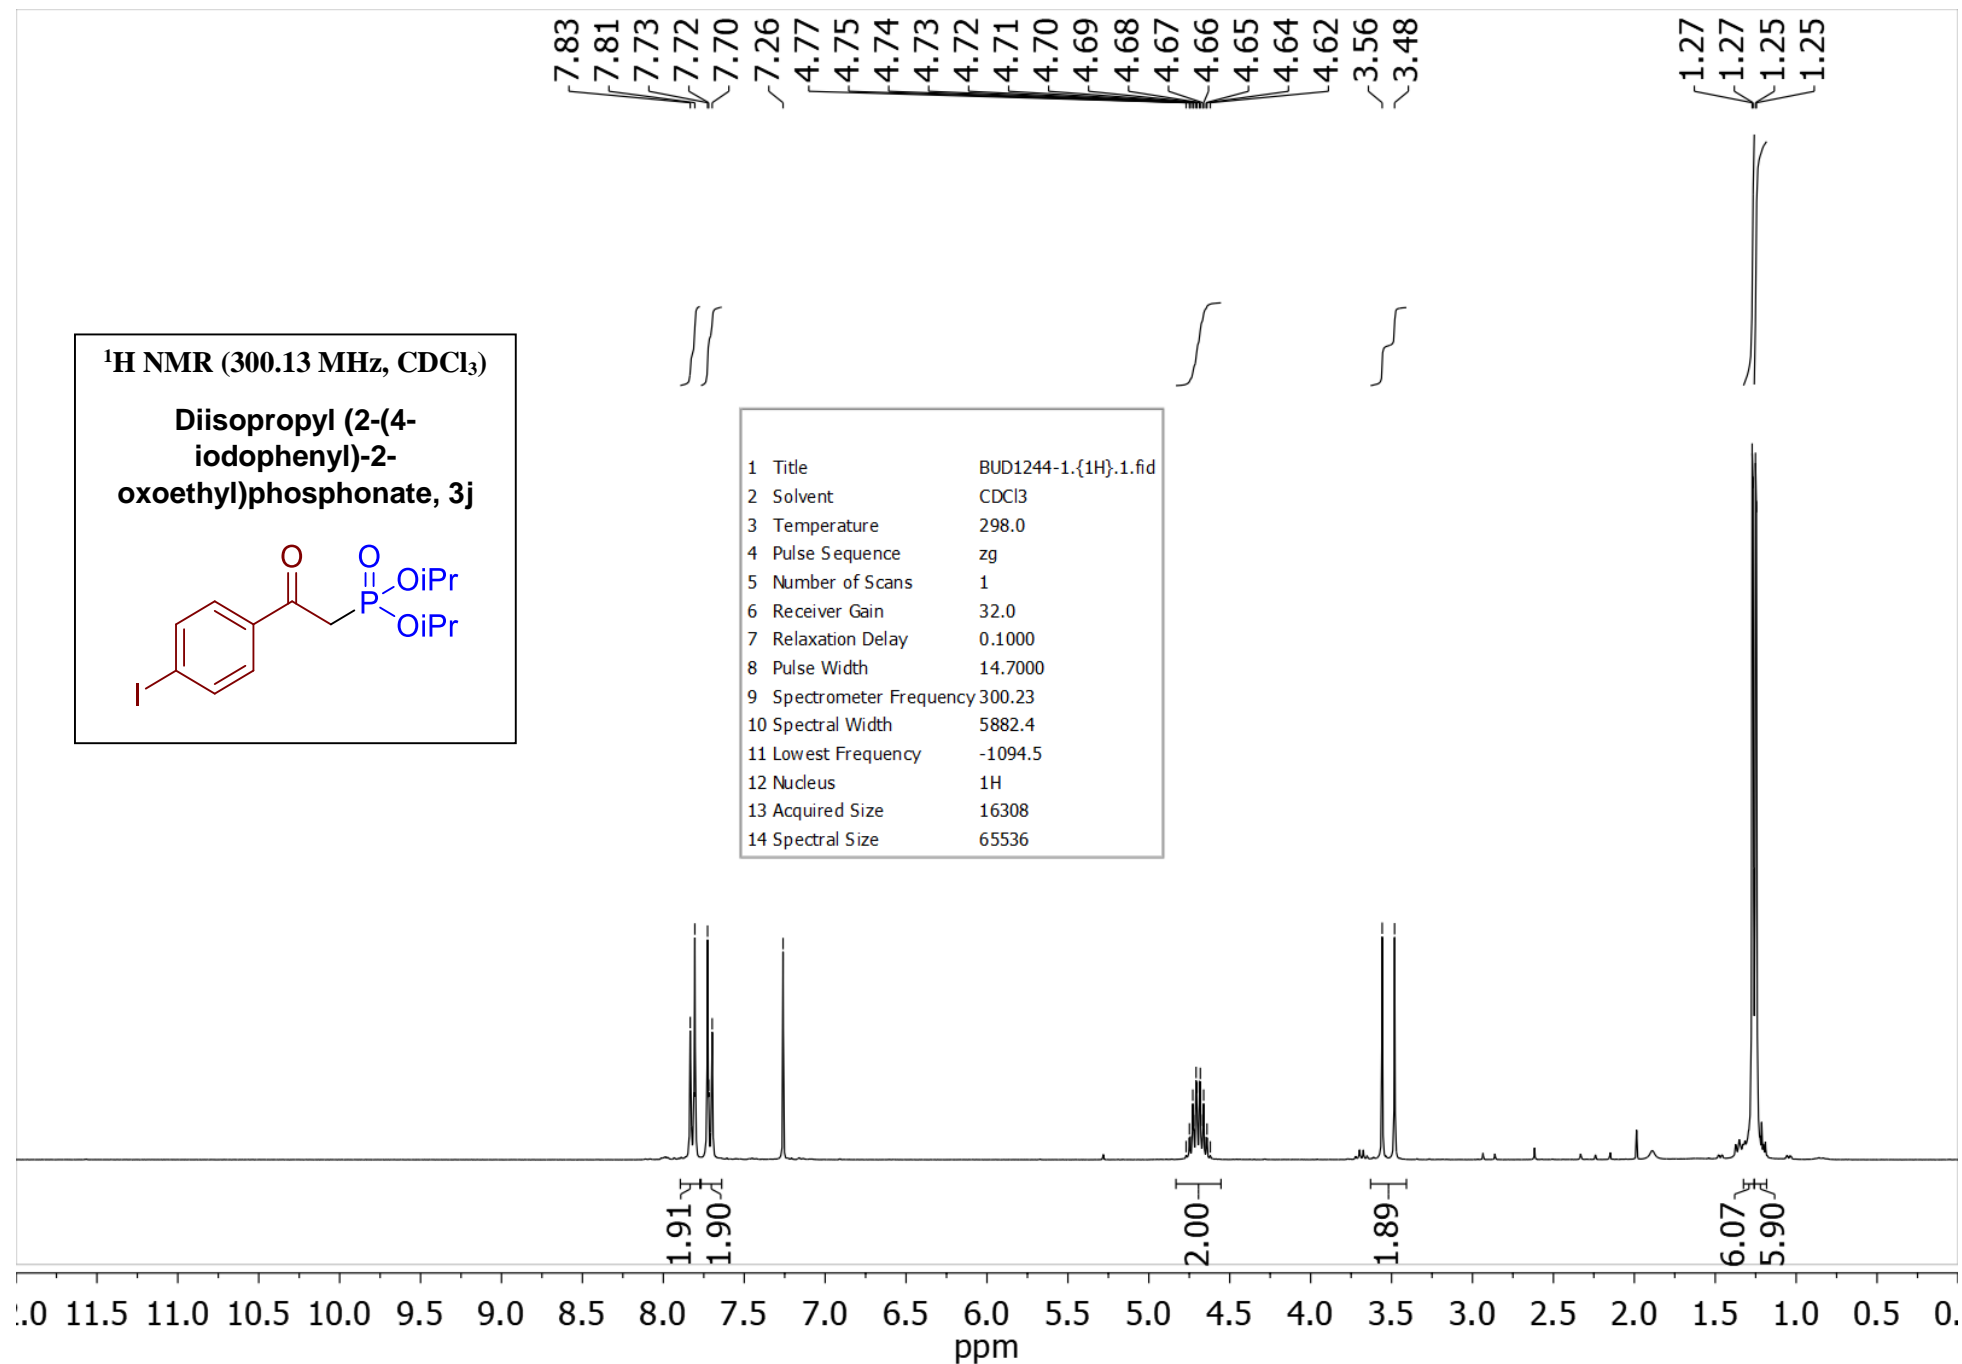

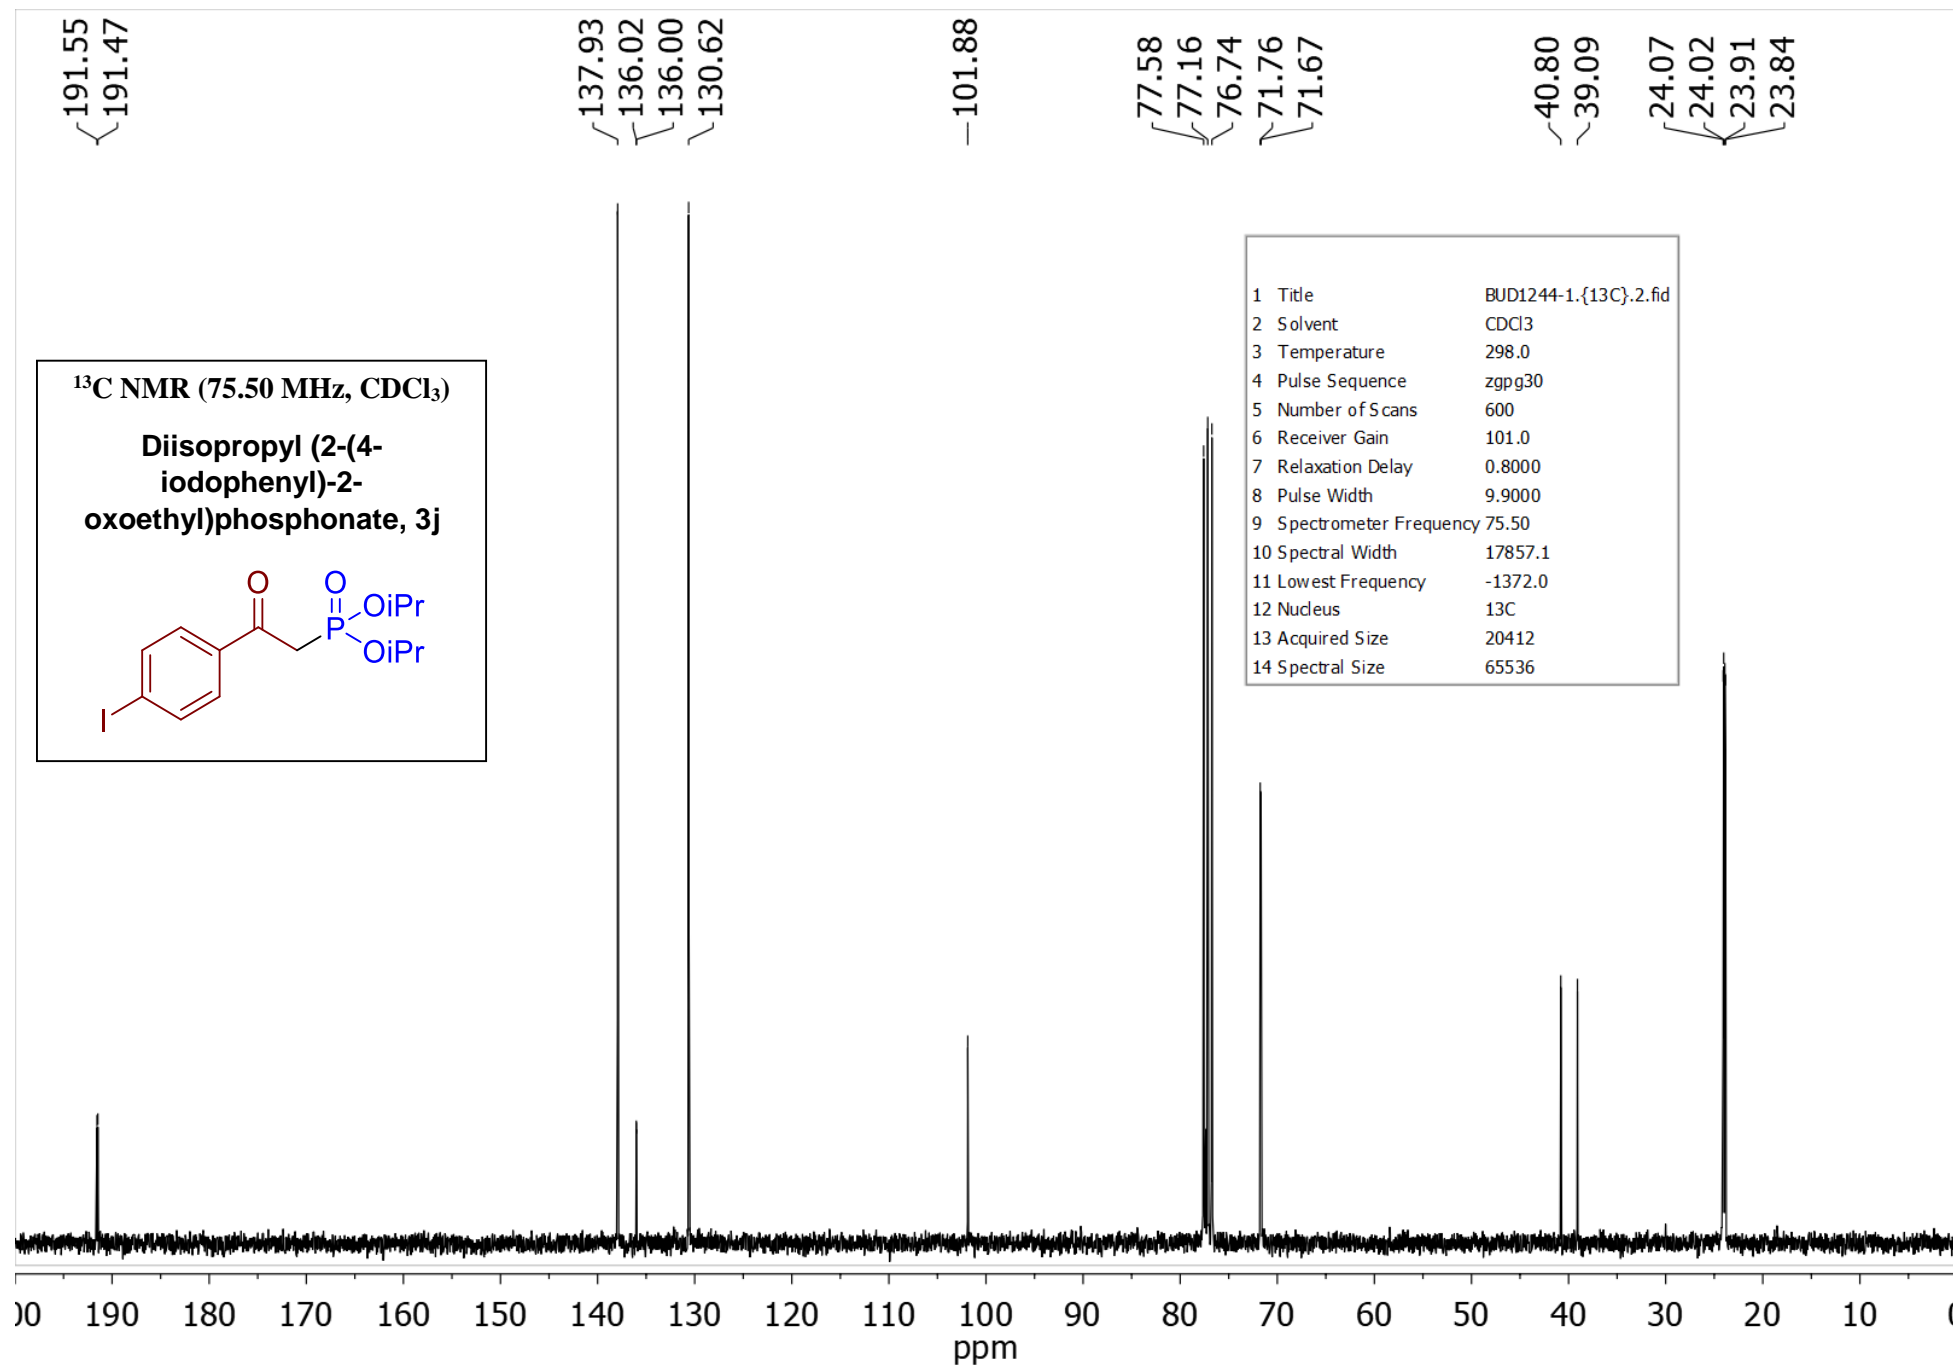

**$^{31}\text{P}$  NMR (121.54 MHz,  $\text{CDCl}_3$ )**

**Diisopropyl (2-(4-iodophenyl)-2-oxoethyl)phosphonate, 3j**

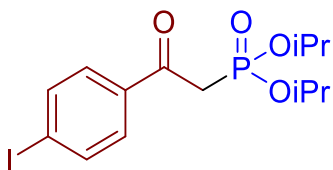

—17.15

|                          |                               |
|--------------------------|-------------------------------|
| 1 Title                  | BUD1244-1.{31P}INVGATED.3.fid |
| 2 Solvent                | $\text{CDCl}_3$               |
| 3 Temperature            | 298.0                         |
| 4 Pulse Sequence         | zgig30                        |
| 5 Number of Scans        | 128                           |
| 6 Receiver Gain          | 101.0                         |
| 7 Relaxation Delay       | 3.0000                        |
| 8 Pulse Width            | 11.0000                       |
| 9 Spectrometer Frequency | 121.54                        |
| 10 Spectral Width        | 48543.7                       |
| 11 Lowest Frequency      | -24272.1                      |
| 12 Nucleus               | $^{31}\text{P}$               |
| 13 Acquired Size         | 32692                         |
| 14 Spectral Size         | 65536                         |

190 170 150 130 110 90 70 50 30 10 -10 -30 -50 -70 -90 -110 -130 -150 -170 -190  
ppm

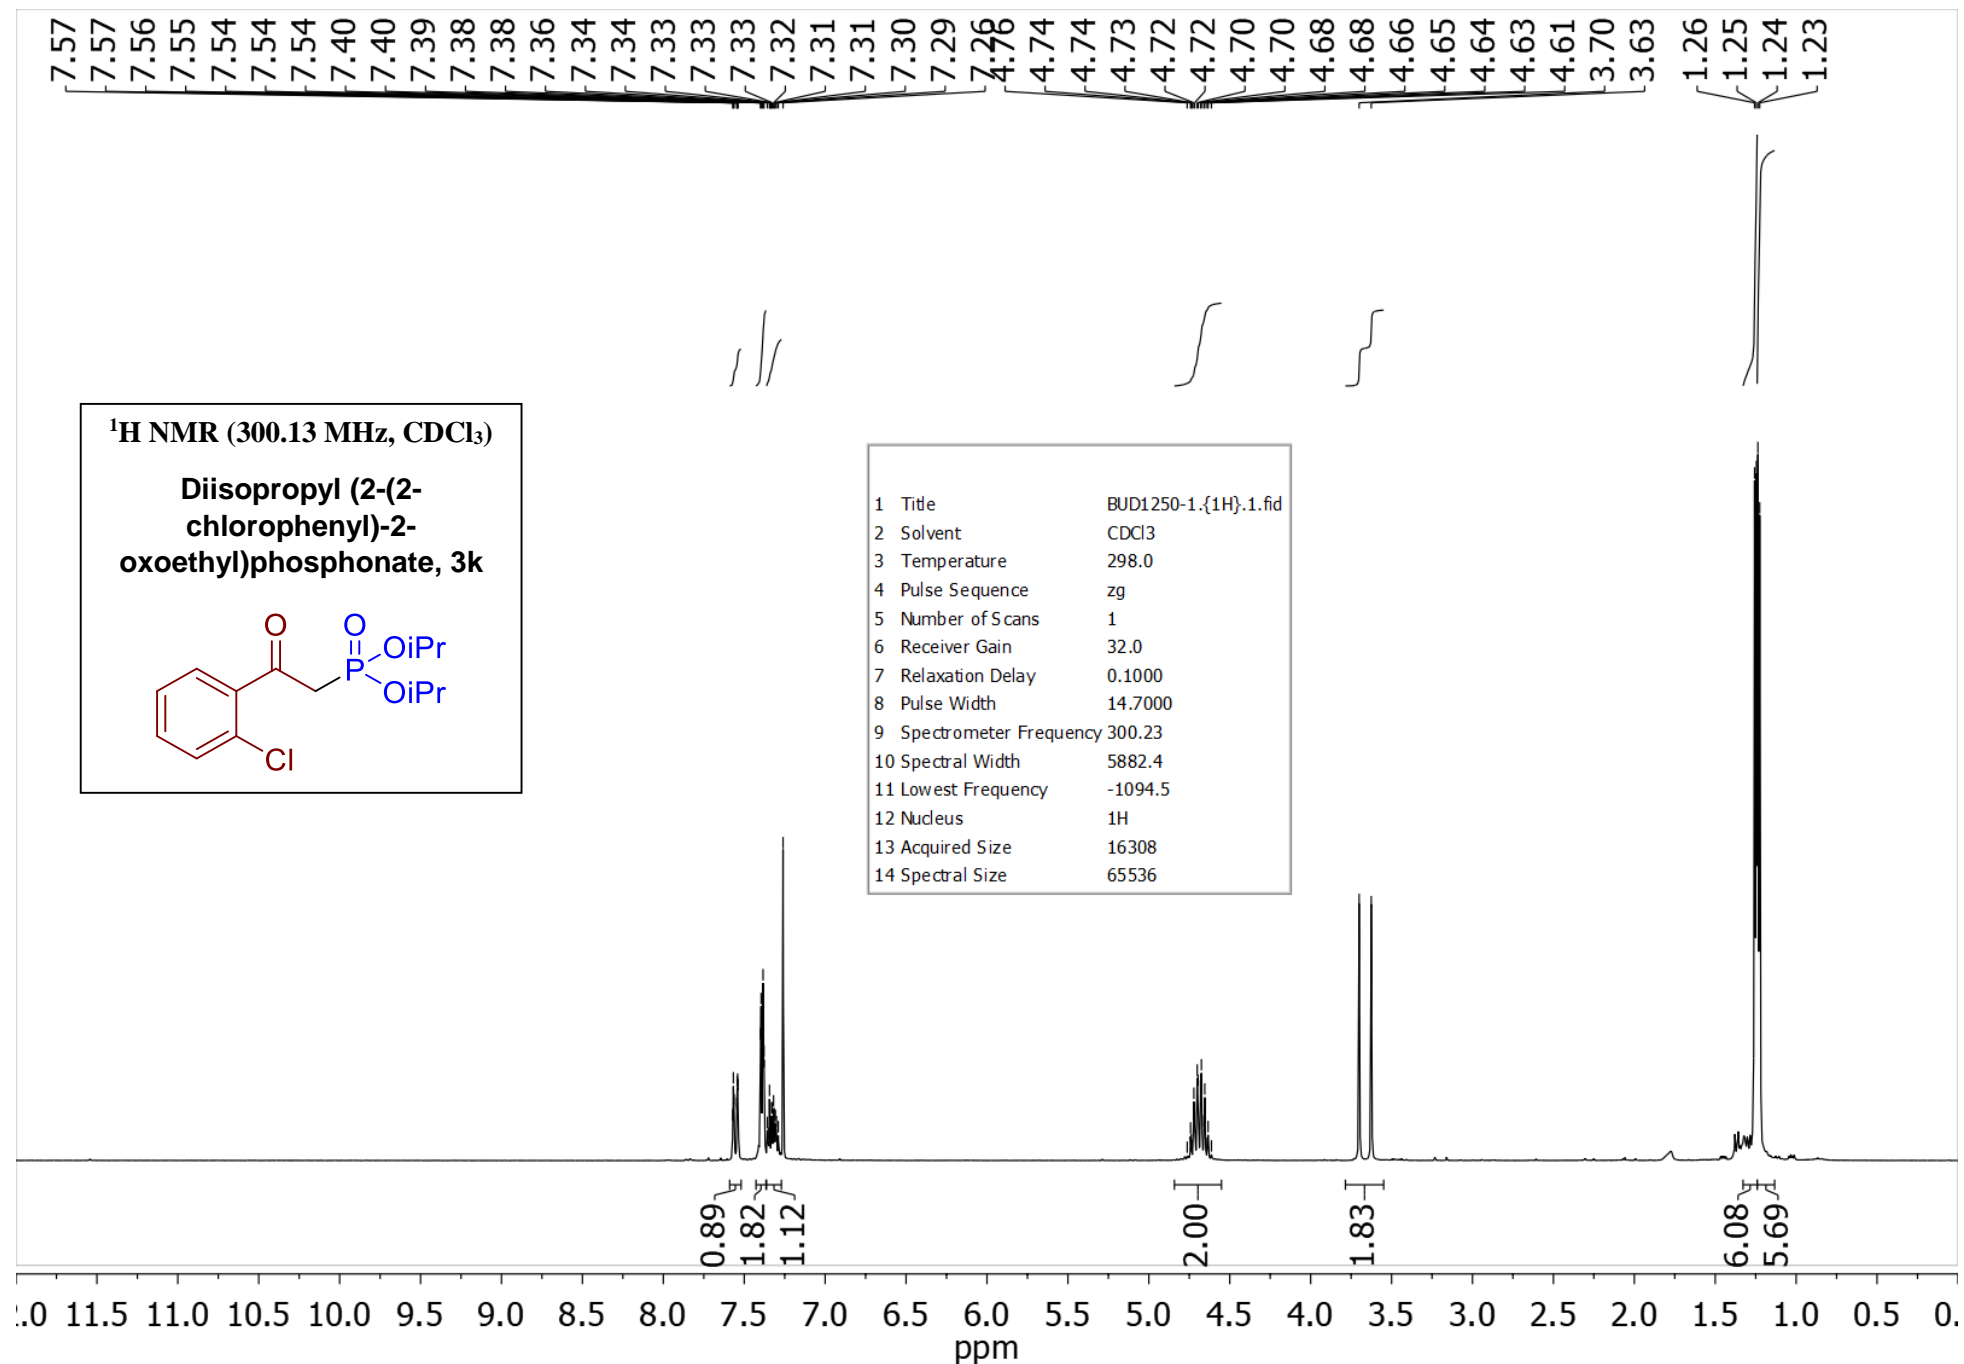

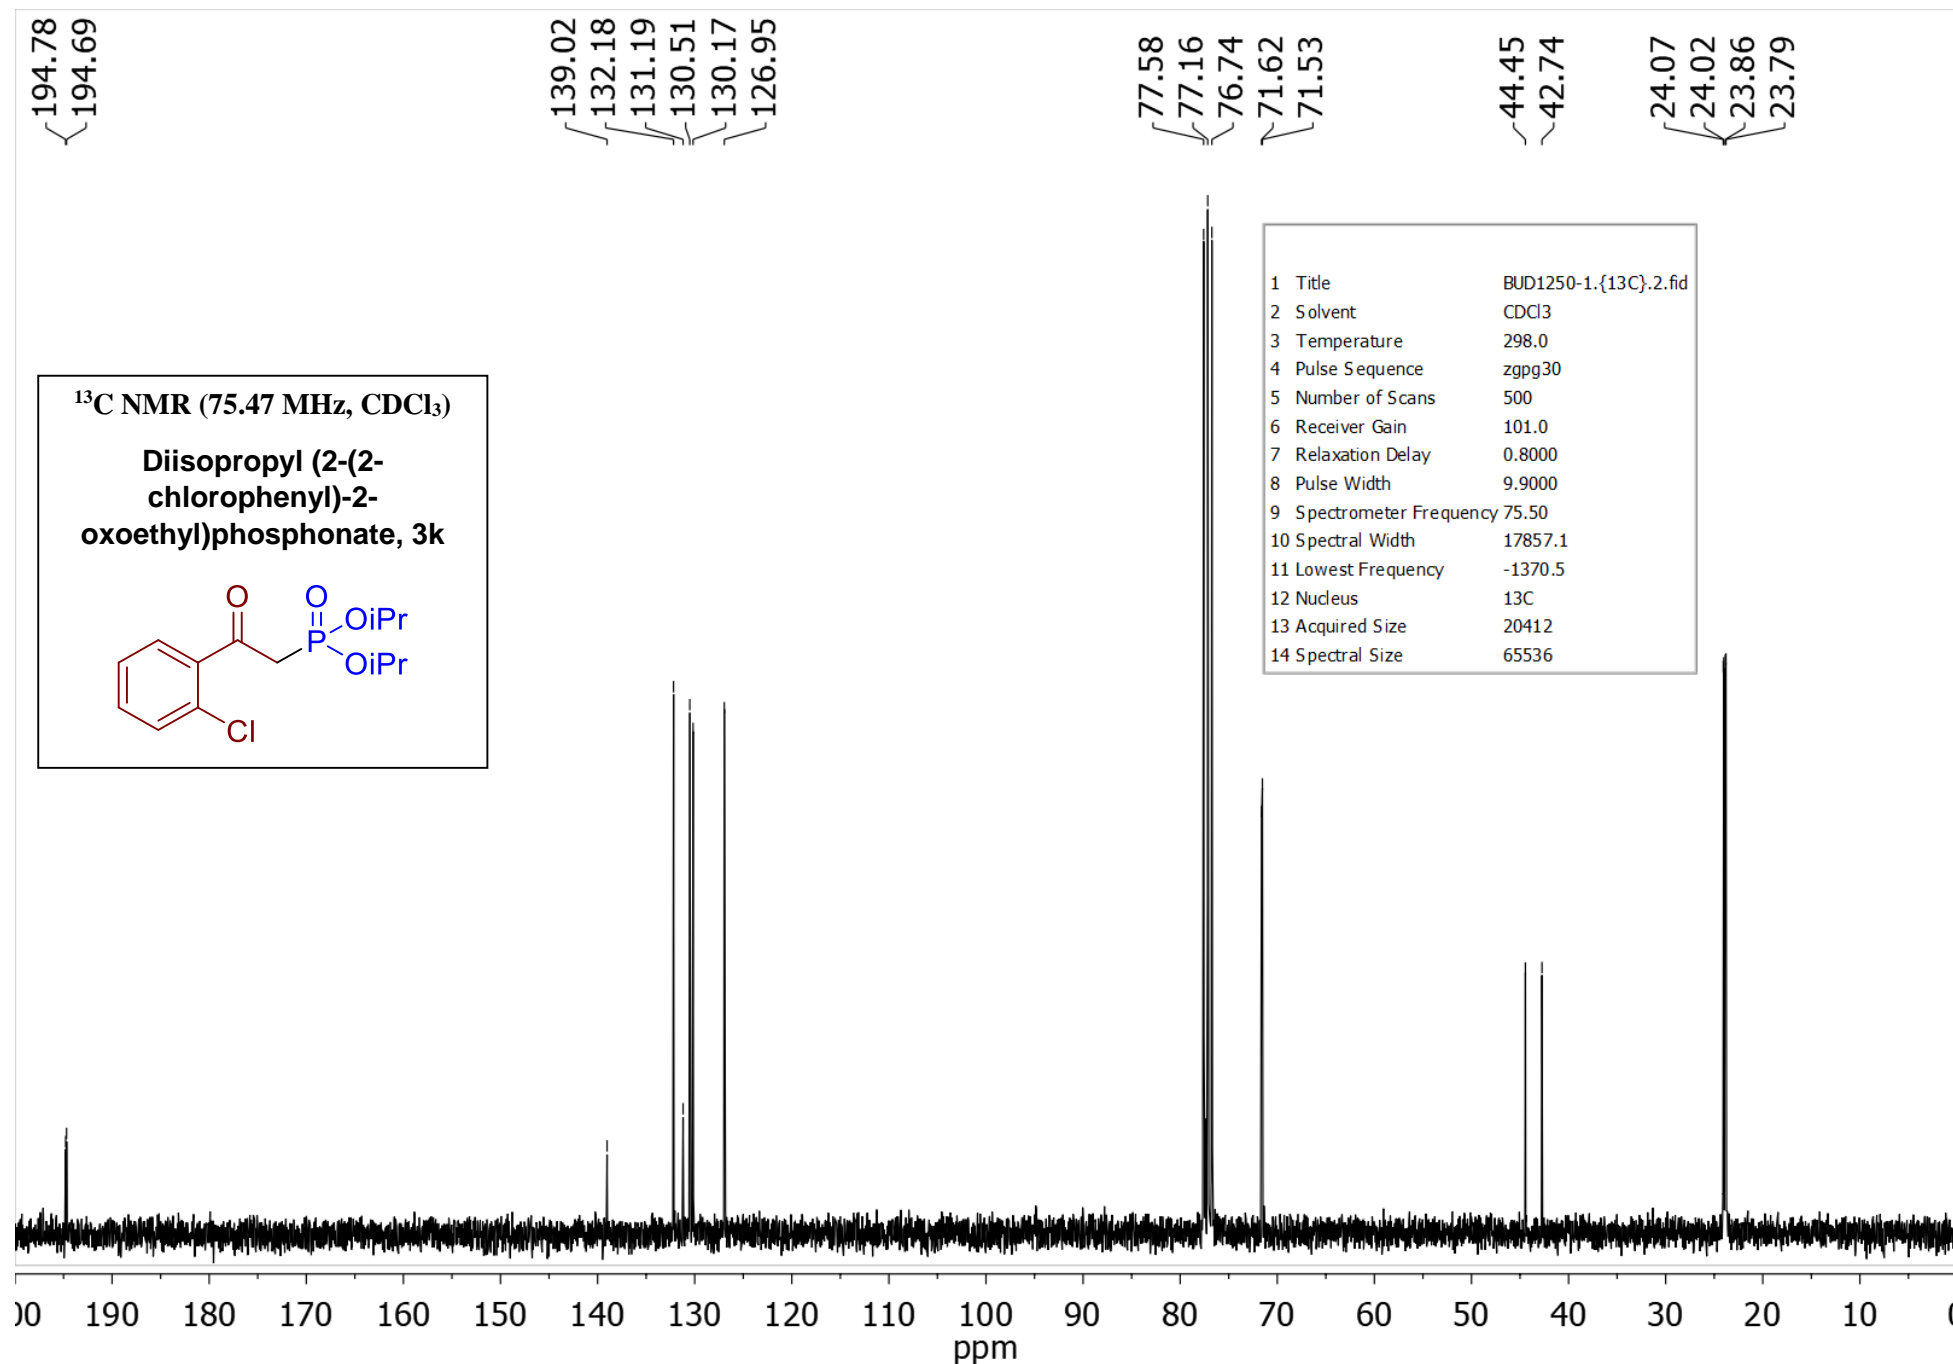

**<sup>31</sup>P NMR (121.54 MHz, CDCl<sub>3</sub>)**

**Diisopropyl (2-(2-chlorophenyl)-2-oxoethyl)phosphonate, 3k**

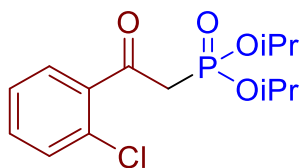

—16.88

|    |                        |                               |
|----|------------------------|-------------------------------|
| 1  | Title                  | BUD1250-1.{31P}INVGATED.3.fid |
| 2  | Solvent                | CDCl <sub>3</sub>             |
| 3  | Temperature            | 298.0                         |
| 4  | Pulse Sequence         | zgig30                        |
| 5  | Number of Scans        | 128                           |
| 6  | Receiver Gain          | 101.0                         |
| 7  | Relaxation Delay       | 3.0000                        |
| 8  | Pulse Width            | 11.0000                       |
| 9  | Spectrometer Frequency | 121.54                        |
| 10 | Spectral Width         | 48543.7                       |
| 11 | Lowest Frequency       | -24272.1                      |
| 12 | Nucleus                | 31P                           |
| 13 | Acquired Size          | 32692                         |
| 14 | Spectral Size          | 65536                         |

190 170 150 130 110 90 70 50 30 10 -10 -30 -50 -70 -90 -110 -130 -150 -170 -190  
ppm

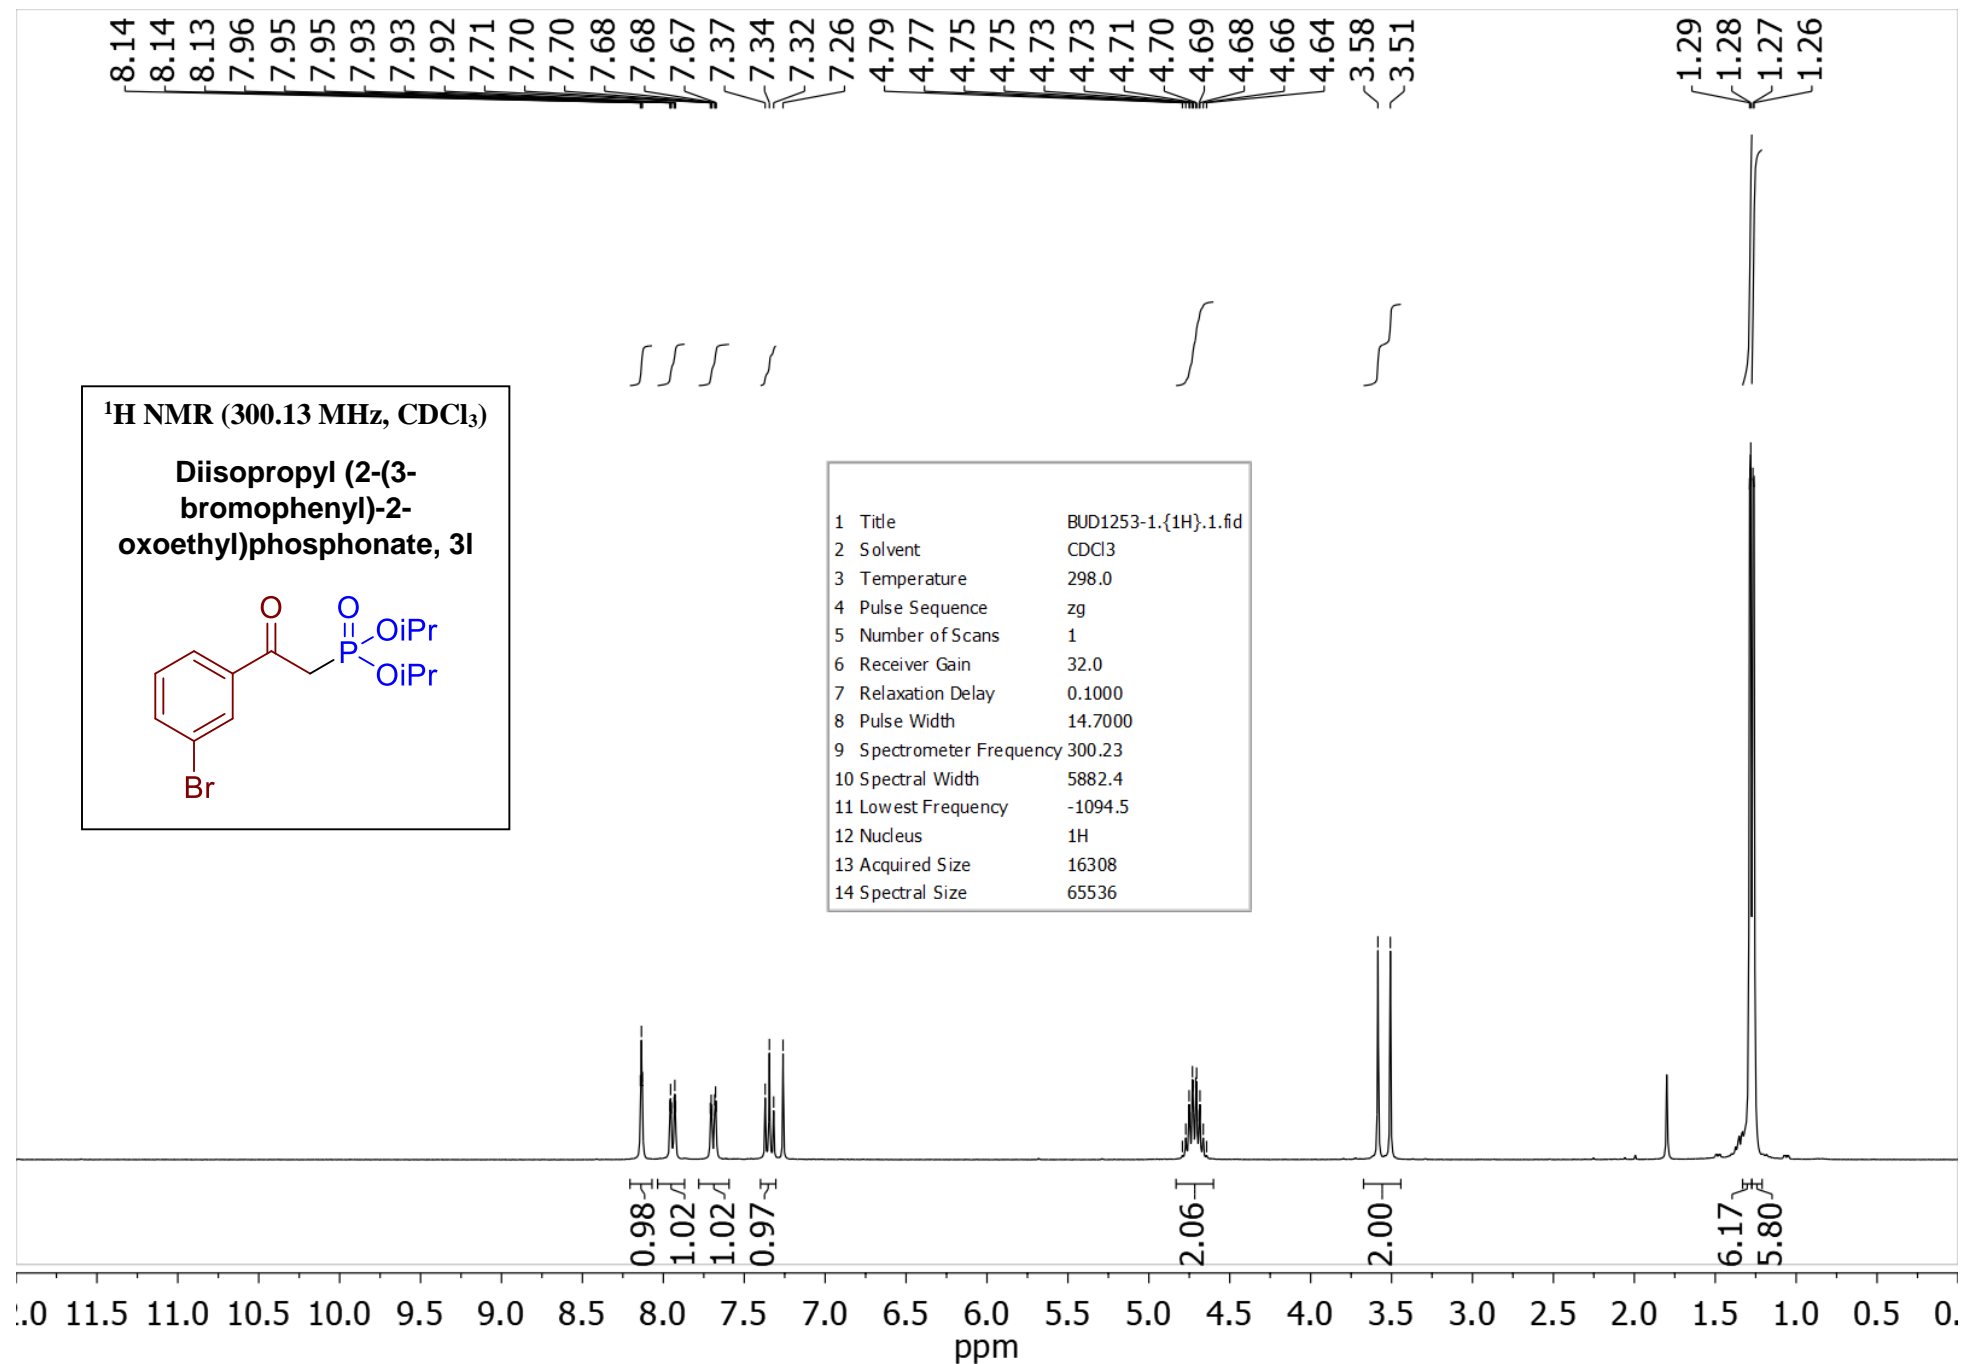



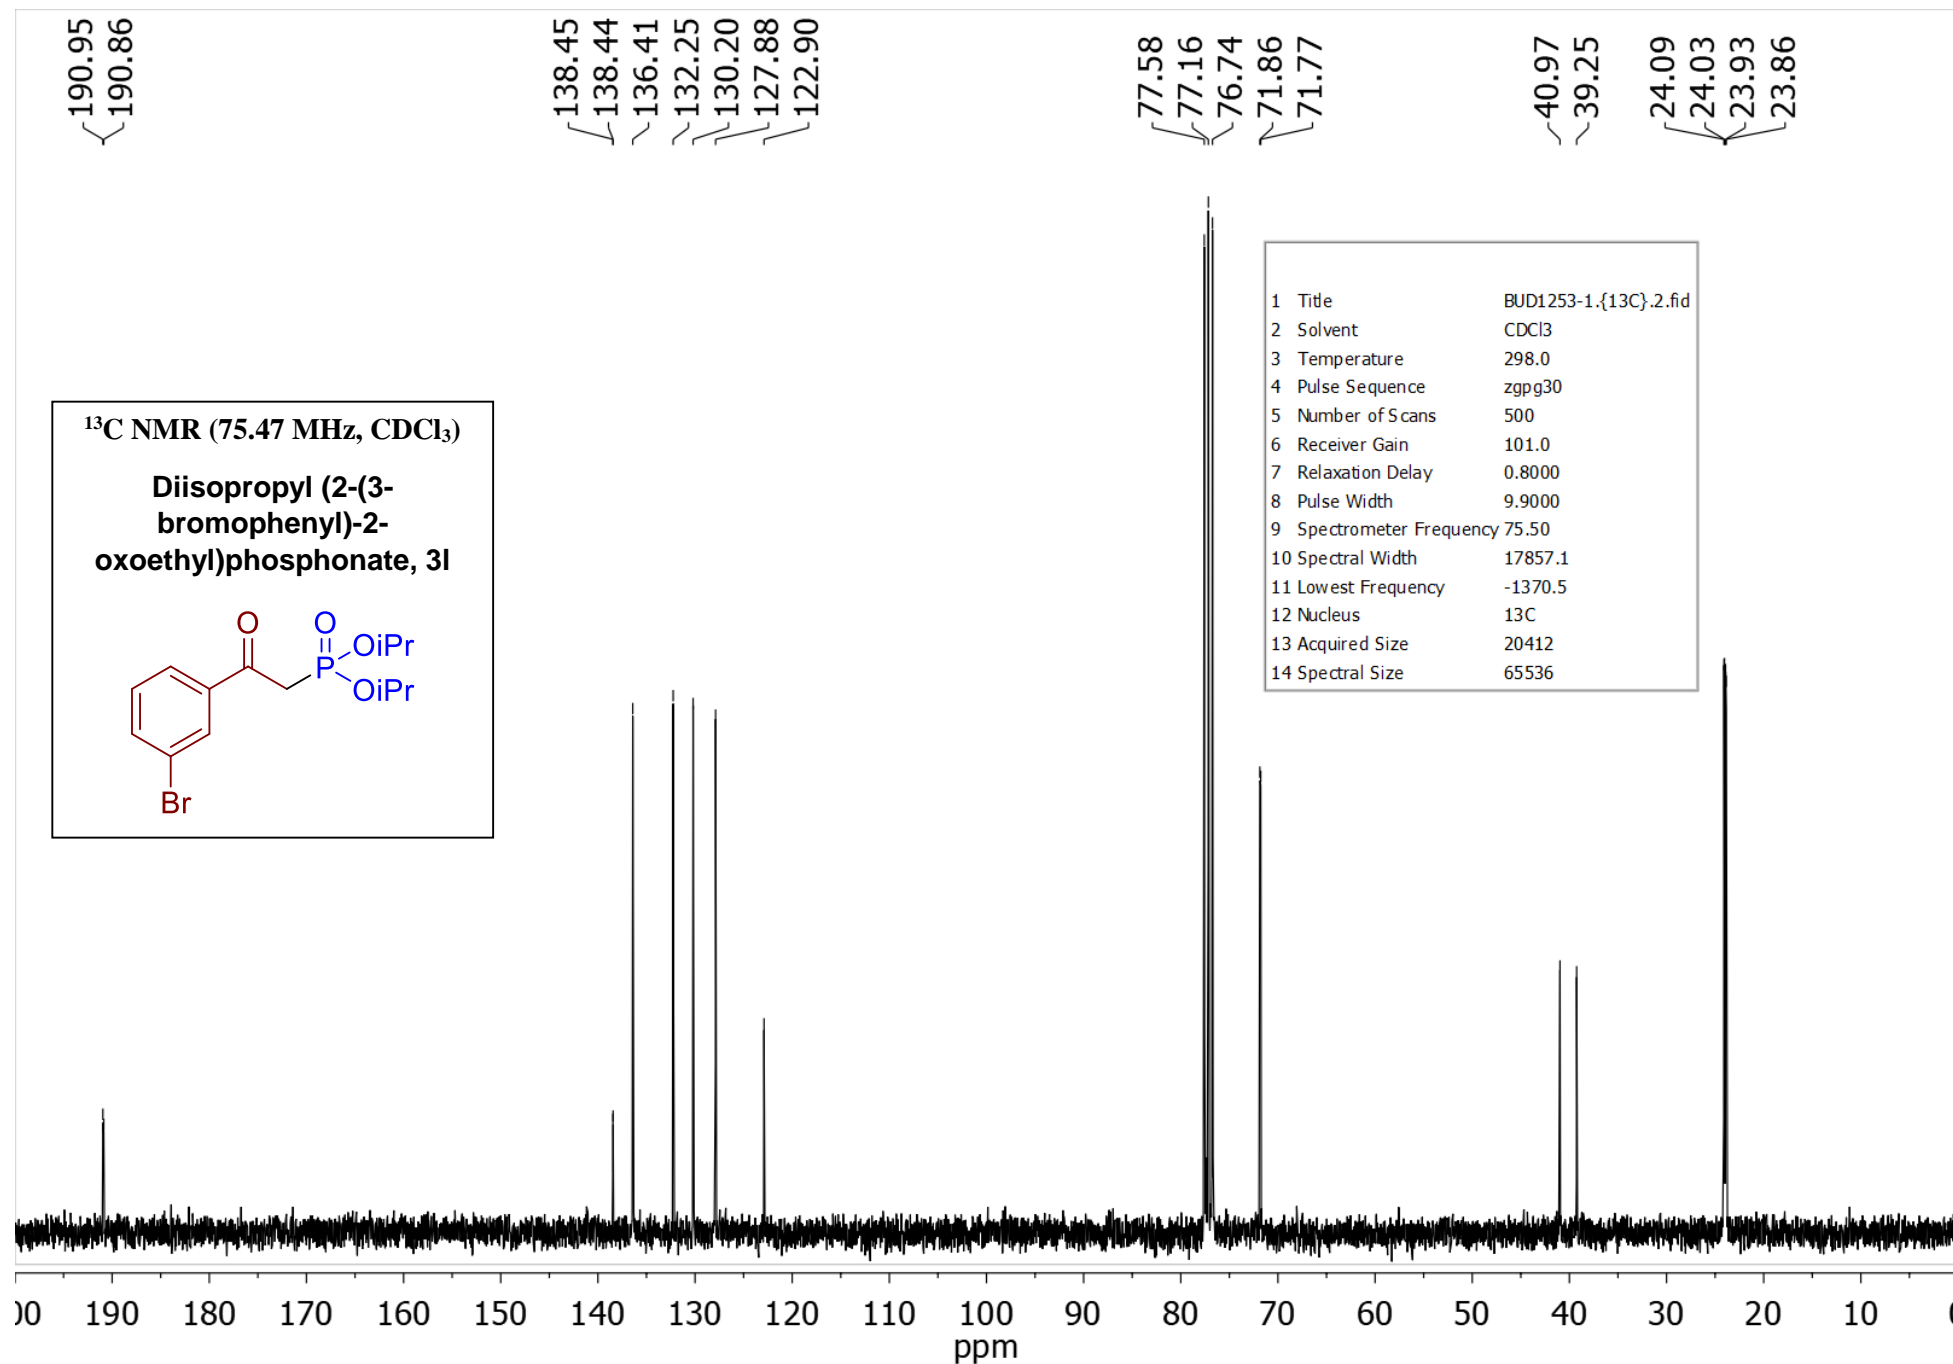

<sup>31</sup>P NMR (121.54 MHz, CDCl<sub>3</sub>)

**Diisopropyl (2-(3-bromophenyl)-2-oxoethyl)phosphonate, 3l**

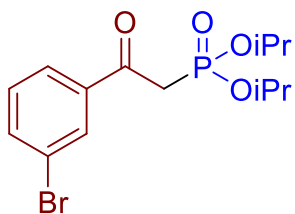

—16.91

|    |                        |                               |
|----|------------------------|-------------------------------|
| 1  | Title                  | BUD1253-1-{31P}INVGATED.3.fid |
| 2  | Solvent                | CDCl <sub>3</sub>             |
| 3  | Temperature            | 298.0                         |
| 4  | Pulse Sequence         | zgig30                        |
| 5  | Number of Scans        | 128                           |
| 6  | Receiver Gain          | 101.0                         |
| 7  | Relaxation Delay       | 3.0000                        |
| 8  | Pulse Width            | 11.0000                       |
| 9  | Spectrometer Frequency | 121.54                        |
| 10 | Spectral Width         | 48543.7                       |
| 11 | Lowest Frequency       | -24272.1                      |
| 12 | Nucleus                | 31P                           |
| 13 | Acquired Size          | 32692                         |
| 14 | Spectral Size          | 65536                         |

190 170 150 130 110 90 70 50 30 10 -10 -30 -50 -70 -90 -110 -130 -150 -170 -190  
ppm

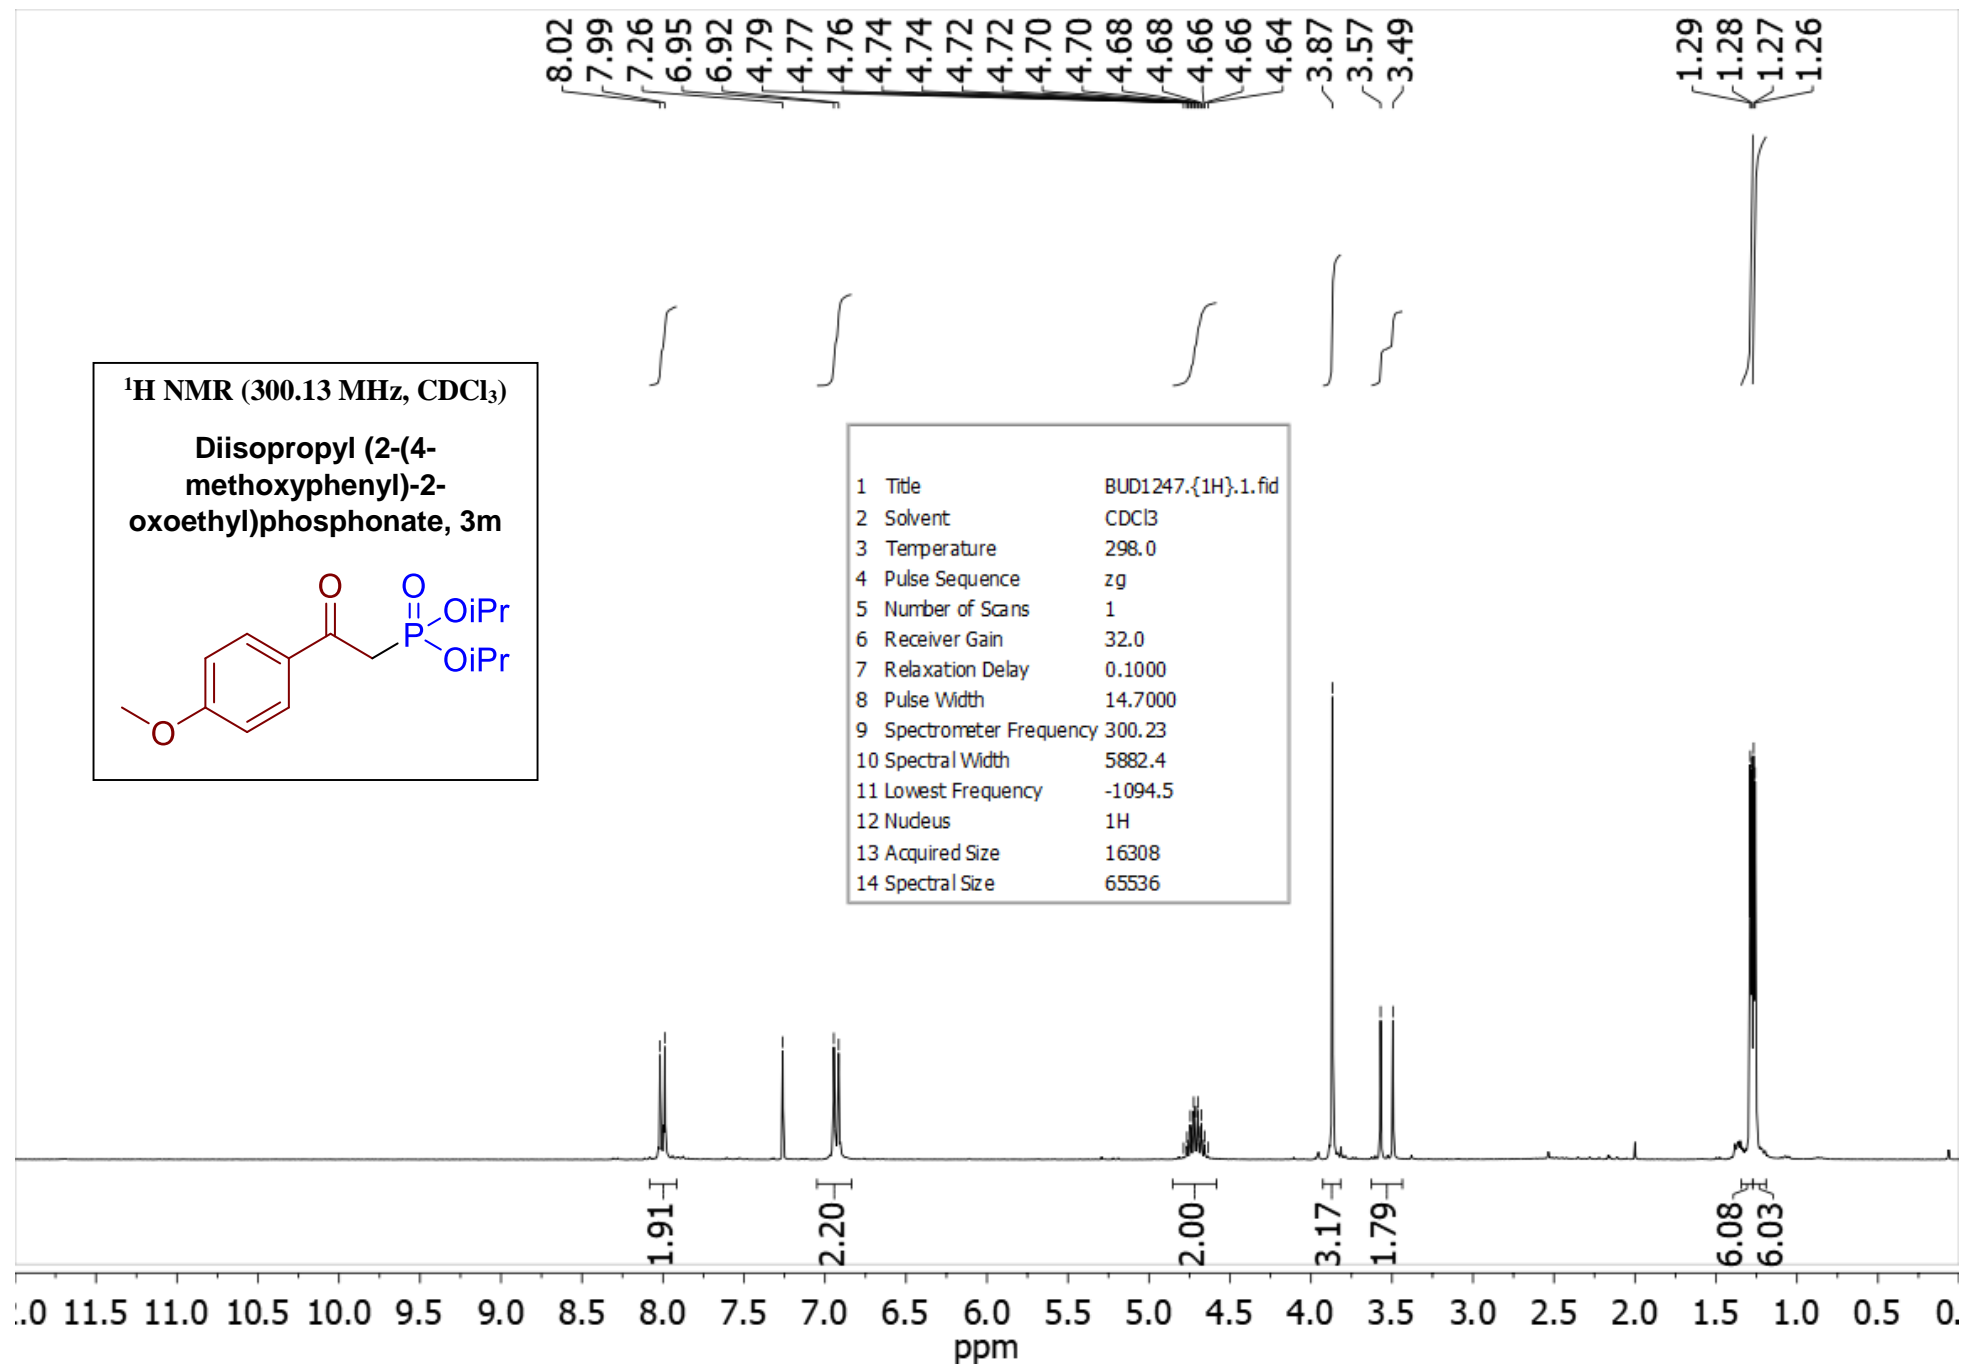

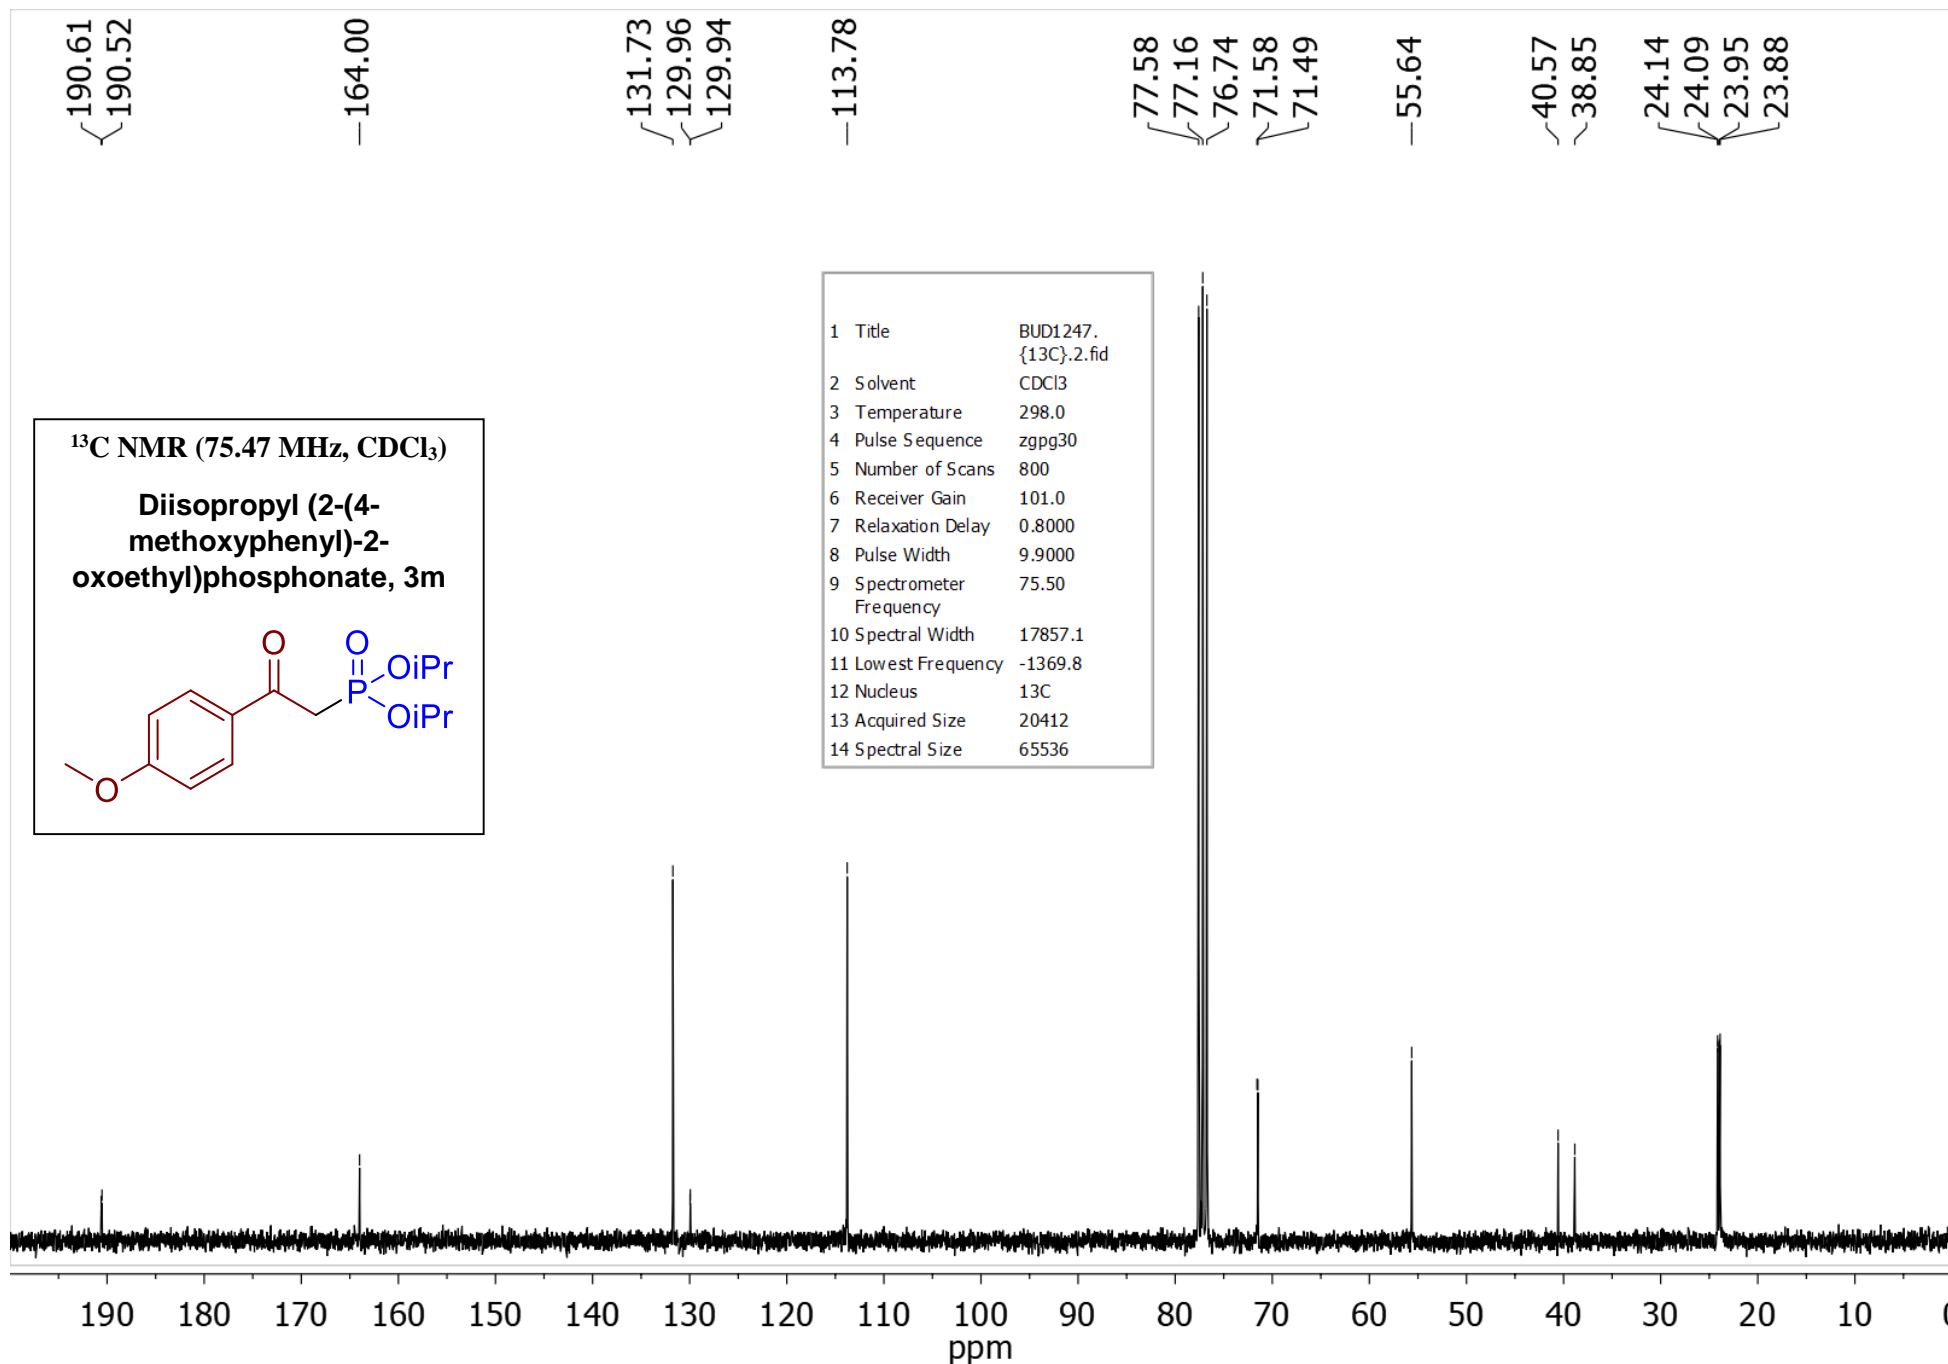

**<sup>31</sup>P NMR (121.54 MHz, CDCl<sub>3</sub>)**

**Diisopropyl (2-(4-methoxyphenyl)-2-oxoethyl)phosphonate, 3m**

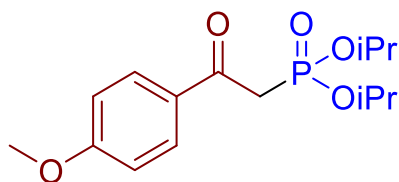

-18.22

|                          |                             |
|--------------------------|-----------------------------|
| 1 Title                  | BUD1247.{31P}INVGATED.3.fid |
| 2 Solvent                | CDCl3                       |
| 3 Temperature            | 298.0                       |
| 4 Pulse Sequence         | zgig30                      |
| 5 Number of Scans        | 128                         |
| 6 Receiver Gain          | 101.0                       |
| 7 Relaxation Delay       | 3.0000                      |
| 8 Pulse Width            | 11.0000                     |
| 9 Spectrometer Frequency | 121.54                      |
| 10 Spectral Width        | 48543.7                     |
| 11 Lowest Frequency      | -24272.1                    |
| 12 Nucleus               | 31P                         |
| 13 Acquired Size         | 32692                       |
| 14 Spectral Size         | 65536                       |

190 170 150 130 110 90 70 50 30 10 -10 -30 -50 -70 -90 -110 -130 -150 -170 -190  
ppm

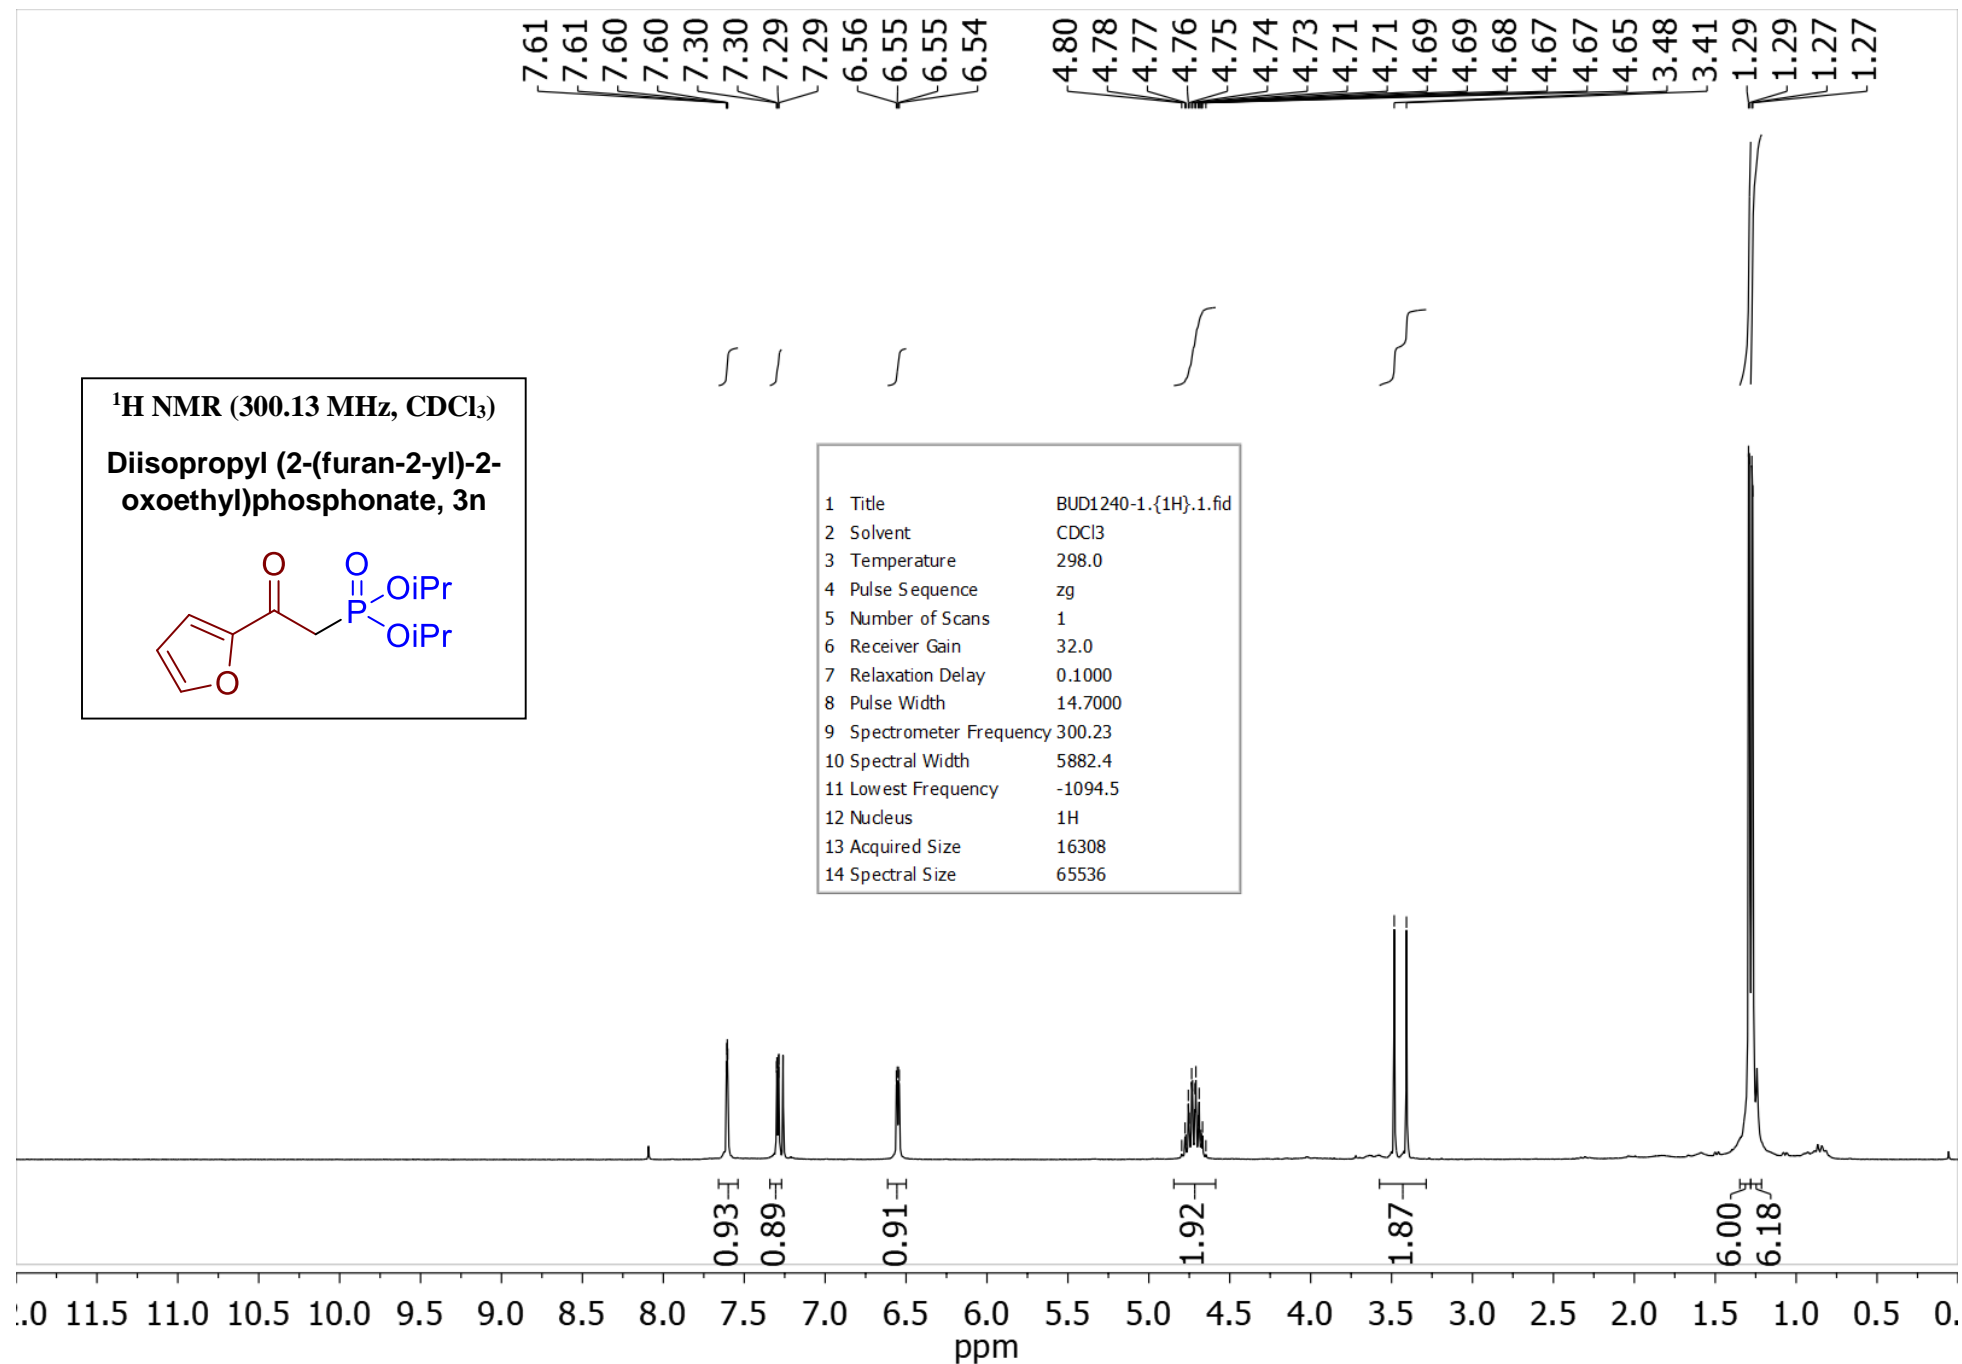

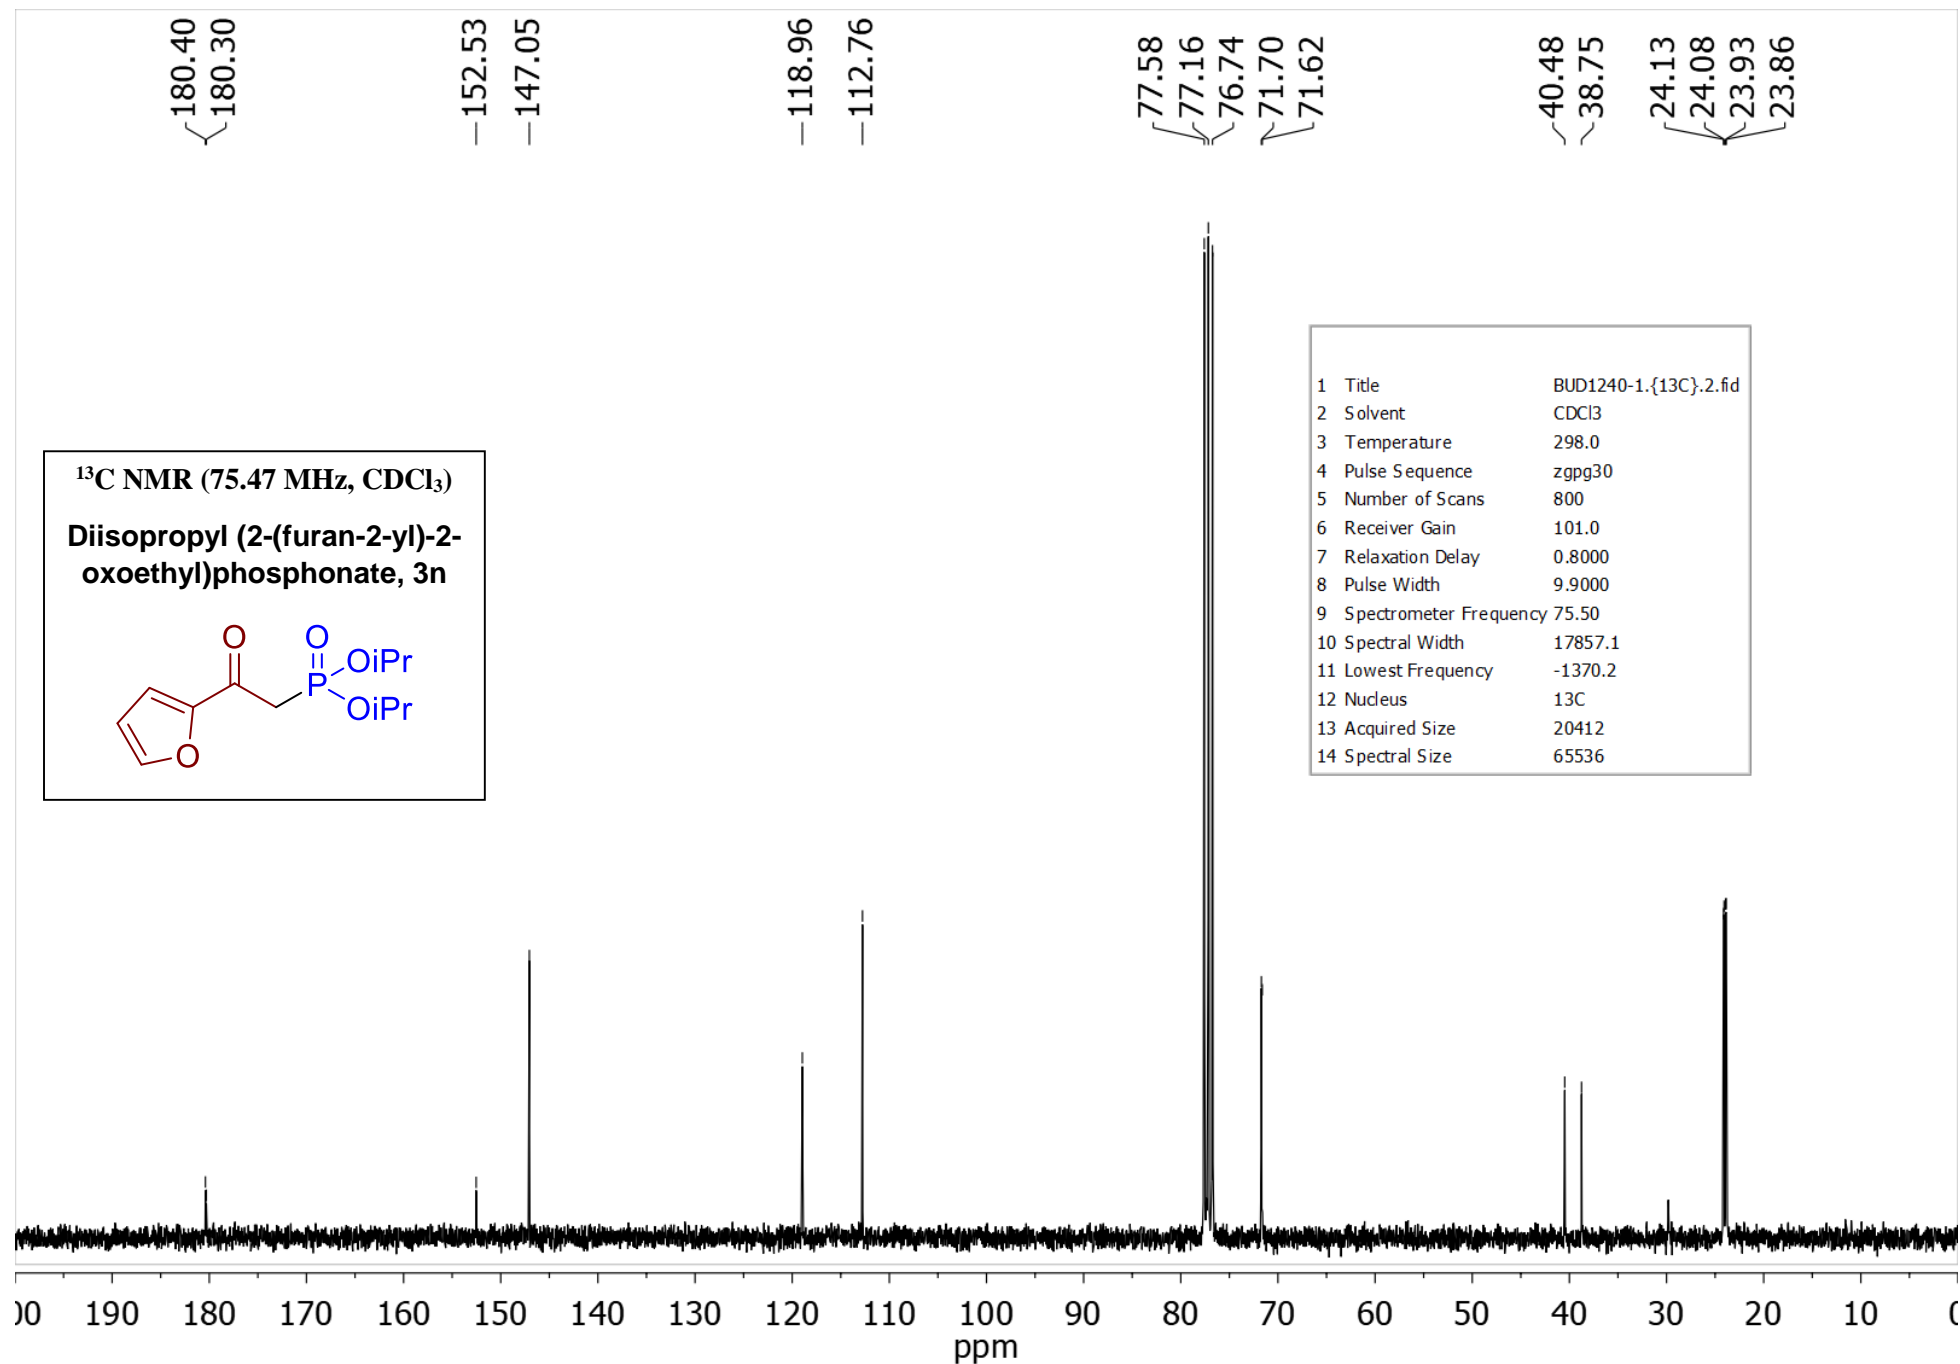

**<sup>31</sup>P NMR (121.54 MHz, CDCl<sub>3</sub>)**

**Diisopropyl (2-(furan-2-yl)-2-oxoethyl)phosphonate, 3n**

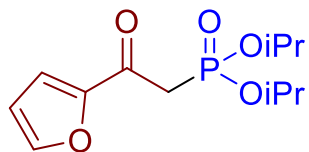

—17.27

|    |                        |                                           |
|----|------------------------|-------------------------------------------|
| 1  | Title                  | BUD1240-1- <sup>31</sup> P}INVGATED.3.fid |
| 2  | Solvent                | CDCl <sub>3</sub>                         |
| 3  | Temperature            | 298.0                                     |
| 4  | Pulse Sequence         | zgig30                                    |
| 5  | Number of Scans        | 128                                       |
| 6  | Receiver Gain          | 101.0                                     |
| 7  | Relaxation Delay       | 3.0000                                    |
| 8  | Pulse Width            | 11.0000                                   |
| 9  | Spectrometer Frequency | 121.54                                    |
| 10 | Spectral Width         | 48543.7                                   |
| 11 | Lowest Frequency       | -24272.1                                  |
| 12 | Nucleus                | <sup>31</sup> P                           |
| 13 | Acquired Size          | 32692                                     |
| 14 | Spectral Size          | 65536                                     |

190 170 150 130 110 90 70 50 30 10 -10 -30 -50 -70 -90 -110 -130 -150 -170 -190  
ppm



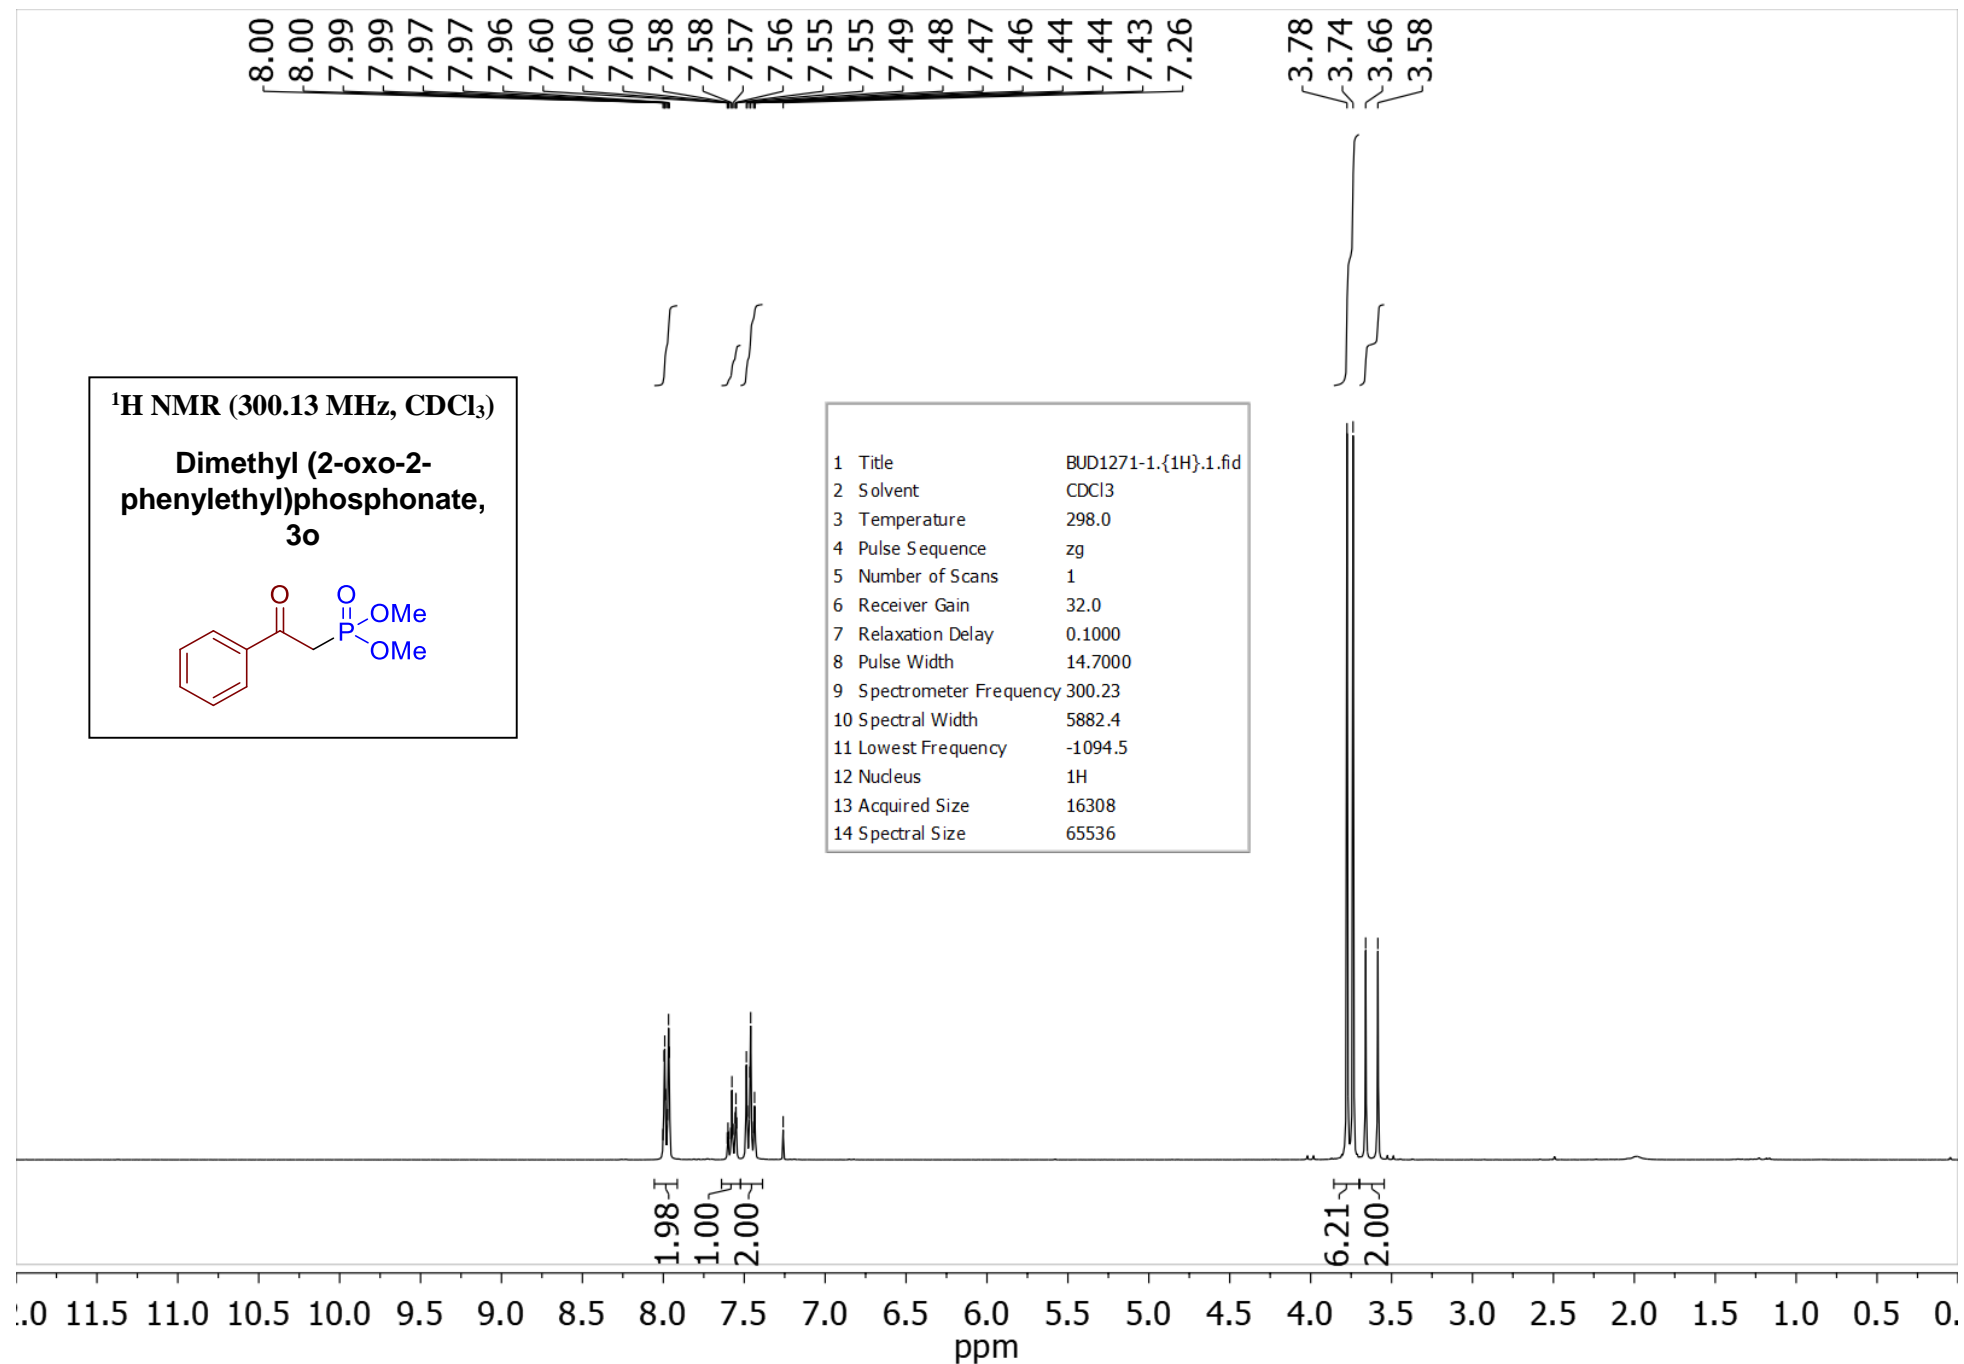

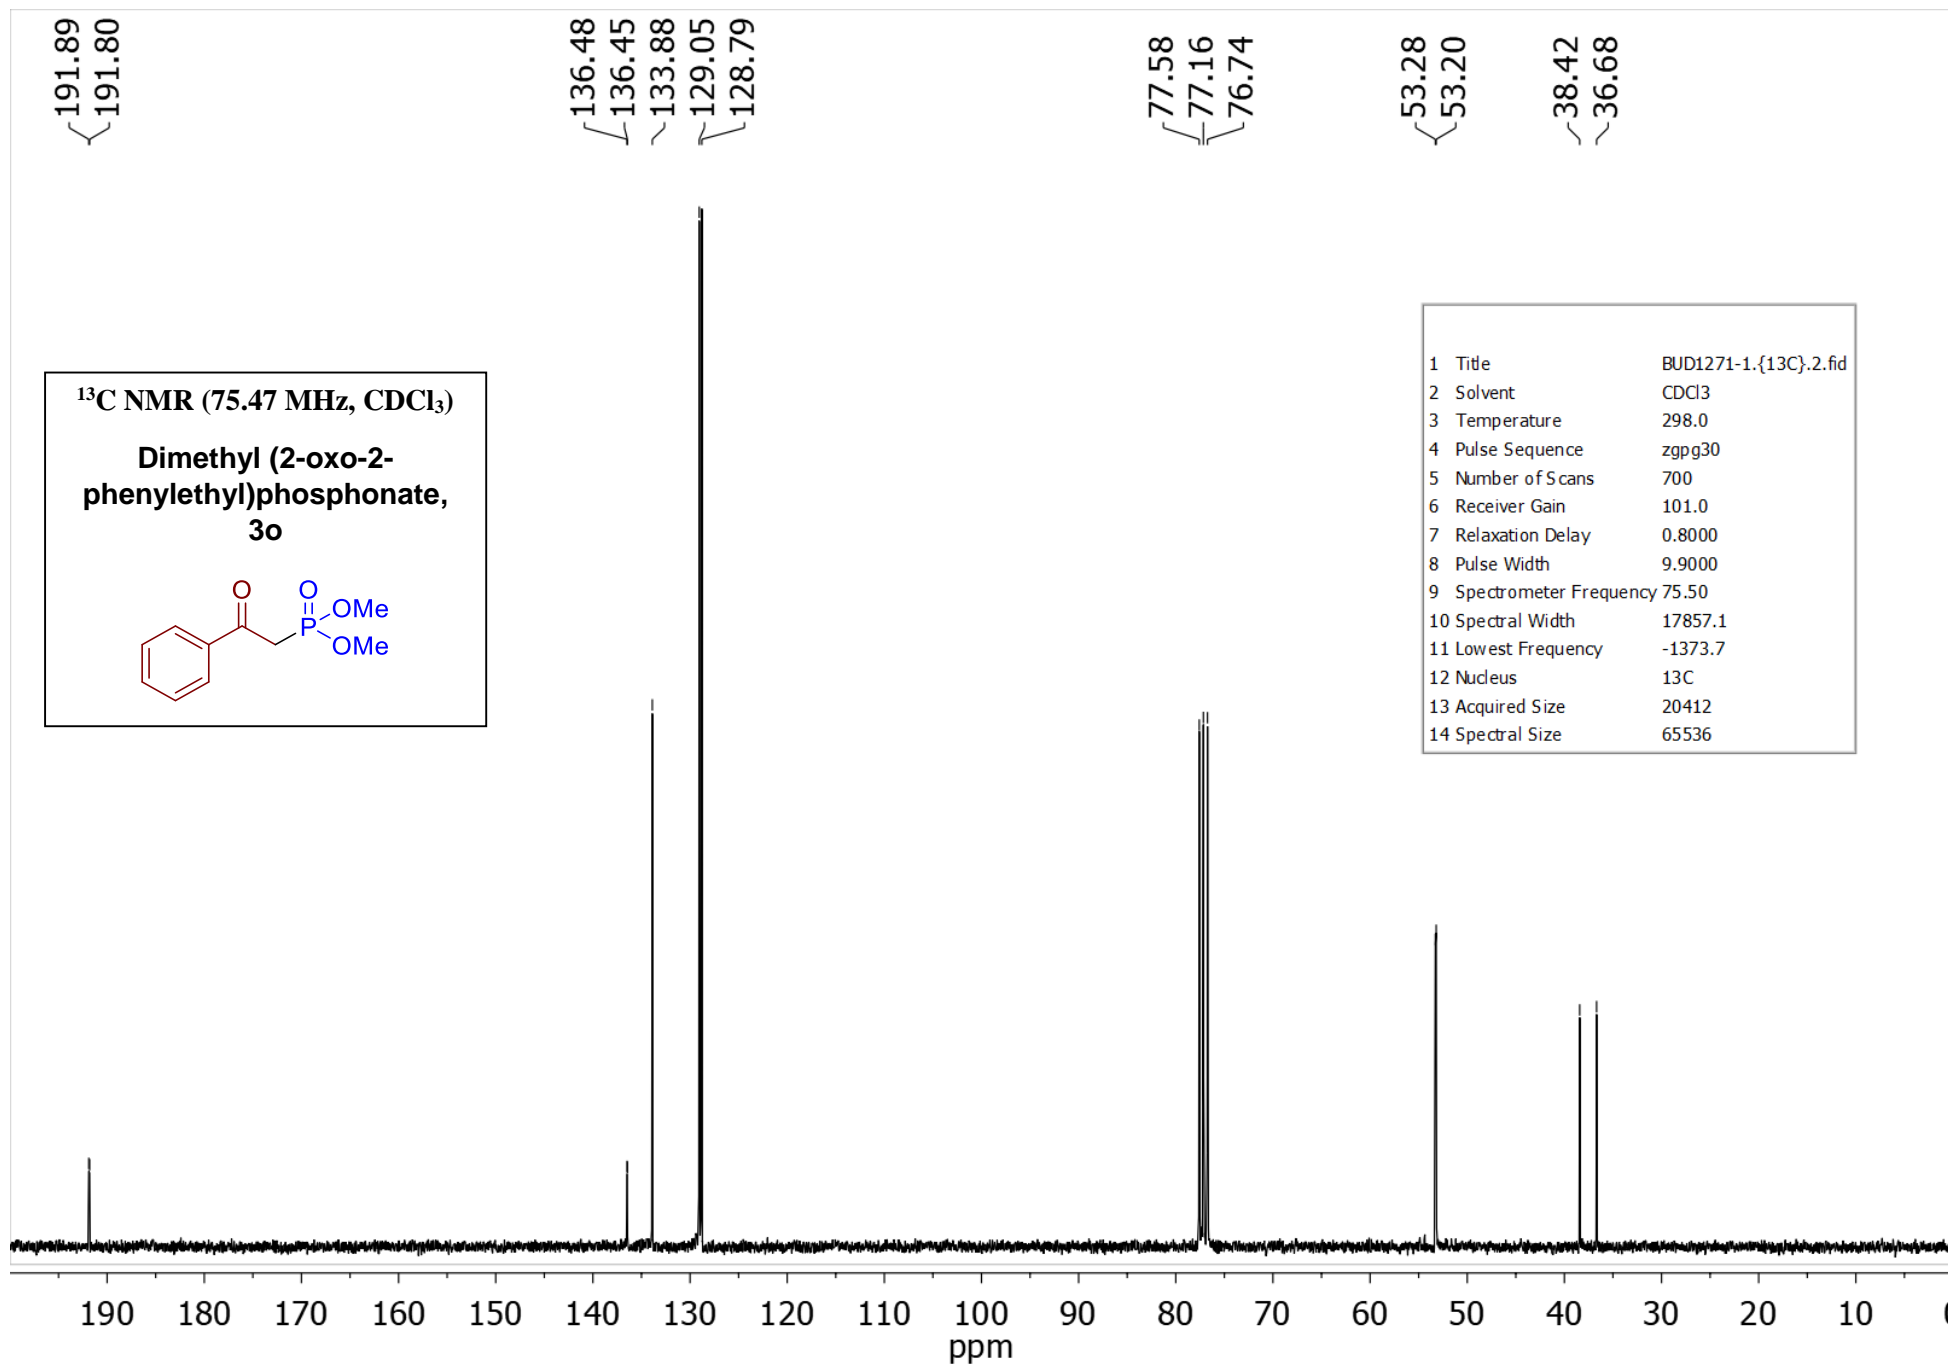

**<sup>31</sup>P NMR (121.54 MHz, CDCl<sub>3</sub>)**

**Dimethyl (2-oxo-2-phenylethyl)phosphonate,  
3o**

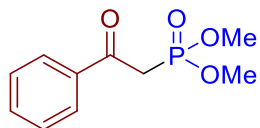

—22.83

|    |                        |                               |
|----|------------------------|-------------------------------|
| 1  | Title                  | BUD1271-1.{31P}INVGATED.3.fid |
| 2  | Solvent                | CDCl3                         |
| 3  | Temperature            | 298.0                         |
| 4  | Pulse Sequence         | zgig30                        |
| 5  | Number of Scans        | 128                           |
| 6  | Receiver Gain          | 101.0                         |
| 7  | Relaxation Delay       | 3.0000                        |
| 8  | Pulse Width            | 11.0000                       |
| 9  | Spectrometer Frequency | 121.54                        |
| 10 | Spectral Width         | 48543.7                       |
| 11 | Lowest Frequency       | -24272.1                      |
| 12 | Nucleus                | 31P                           |
| 13 | Acquired Size          | 32692                         |
| 14 | Spectral Size          | 65536                         |

190 170 150 130 110 90 70 50 30 10 -10 -30 -50 -70 -90 -110 -130 -150 -170 -190  
ppm

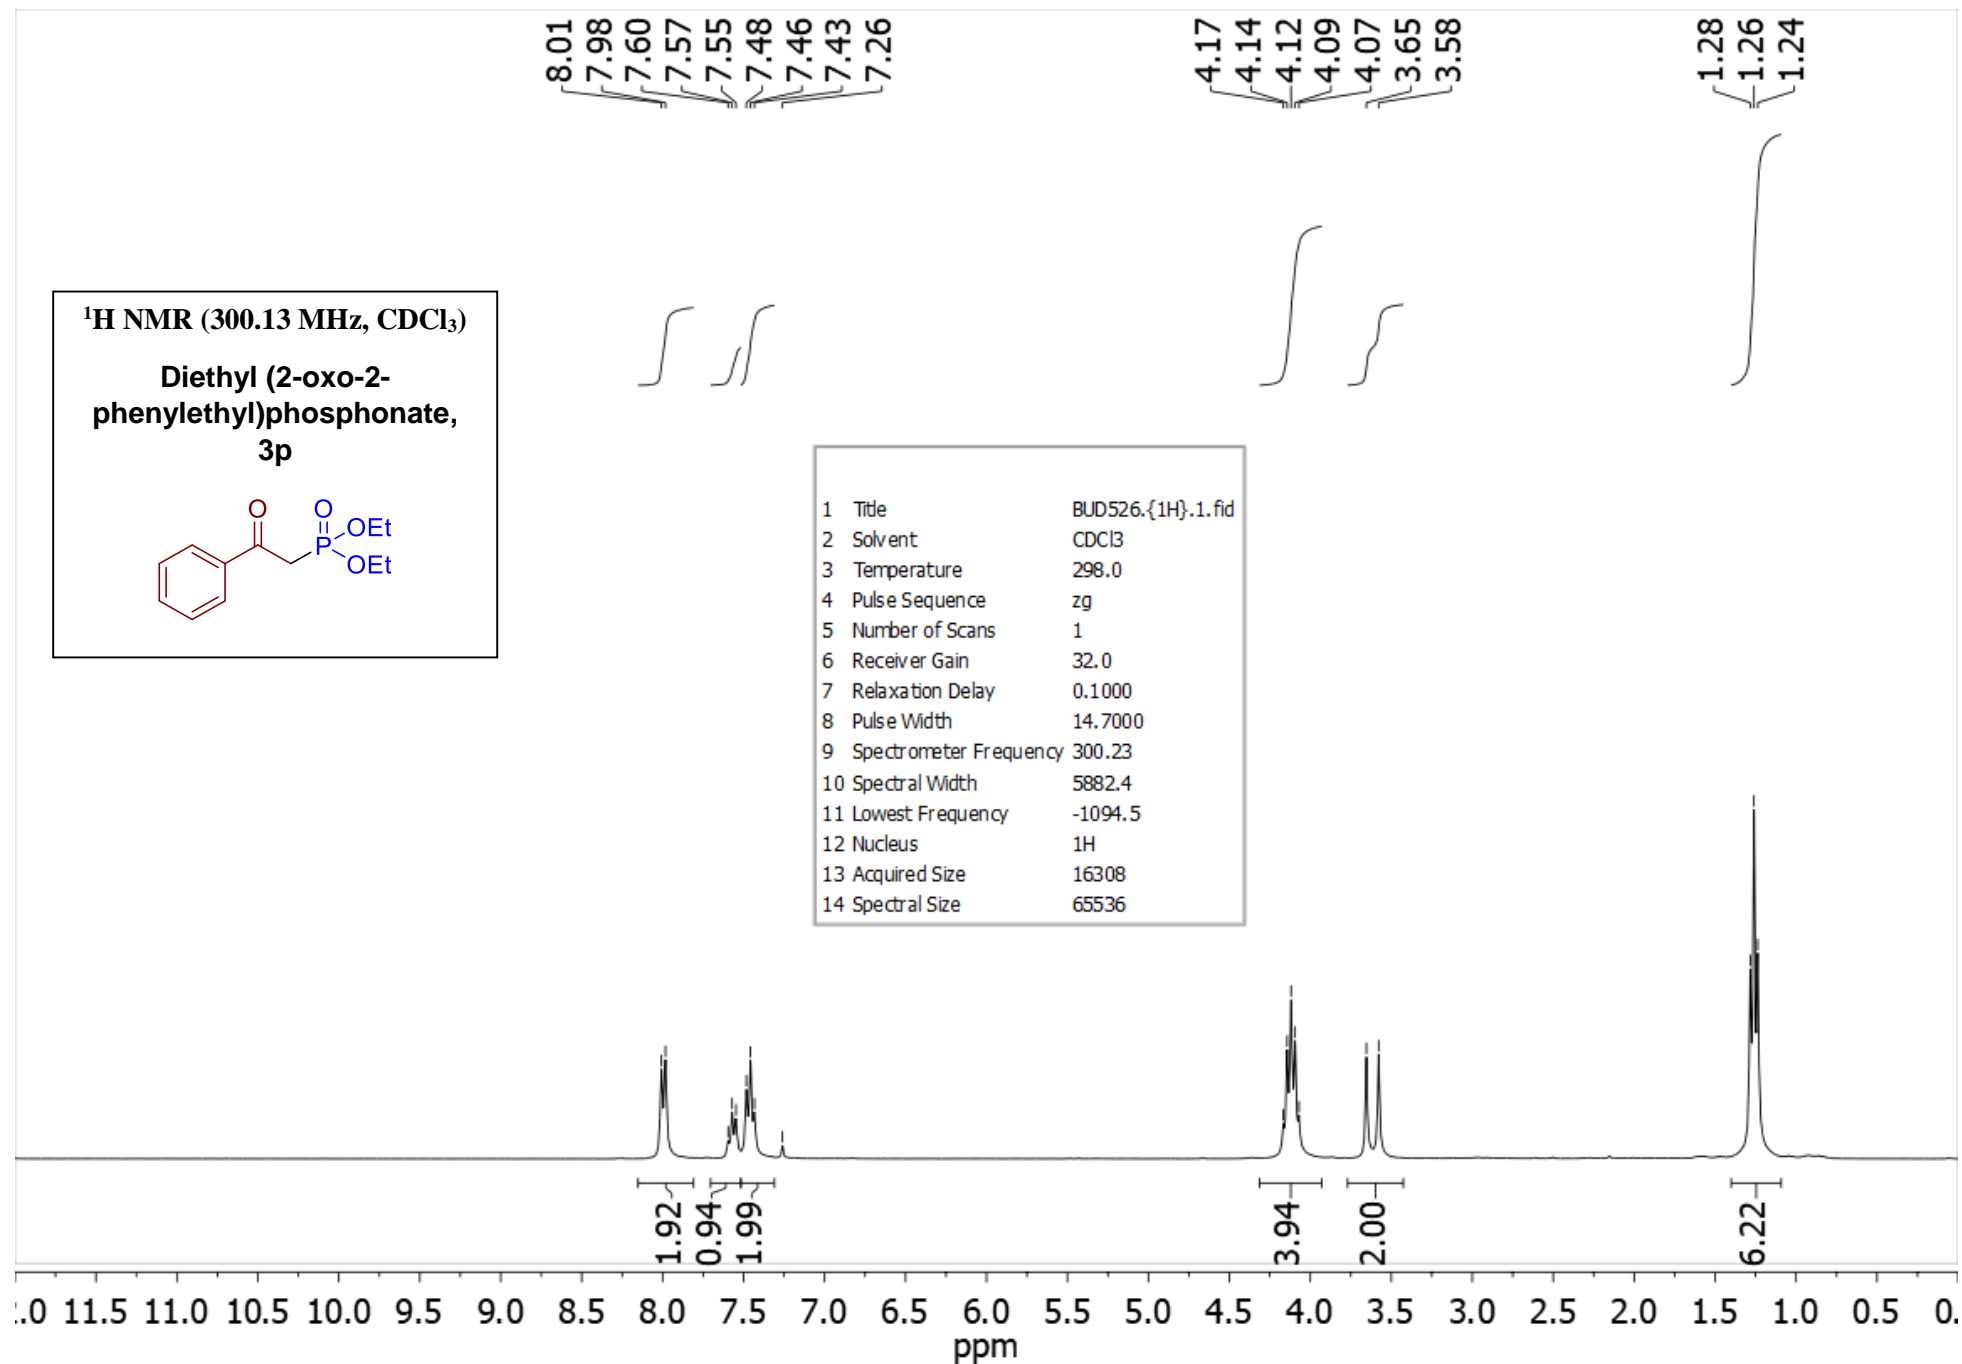

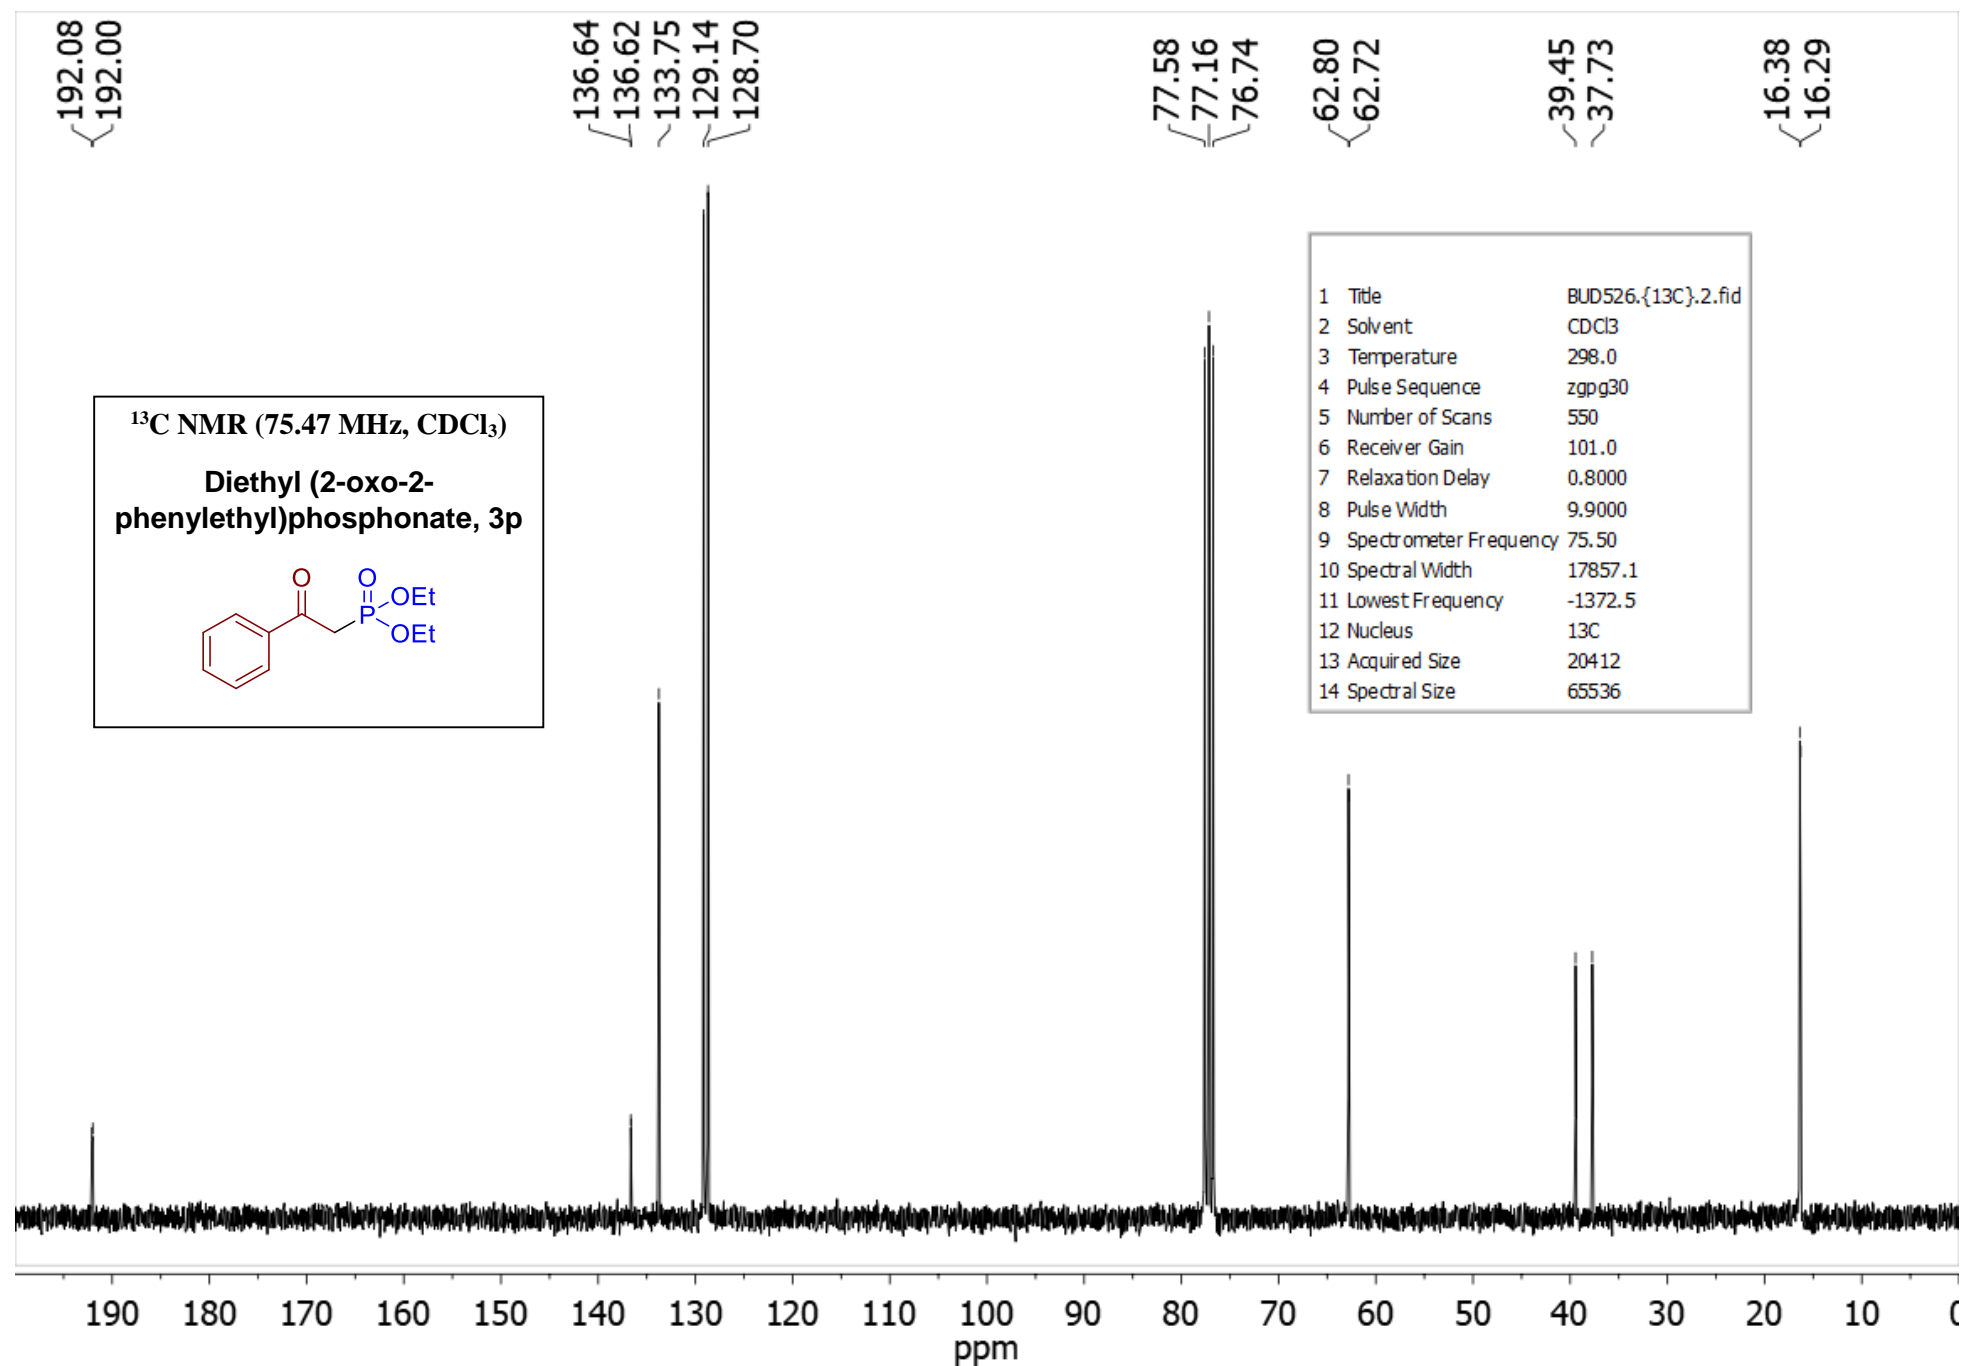

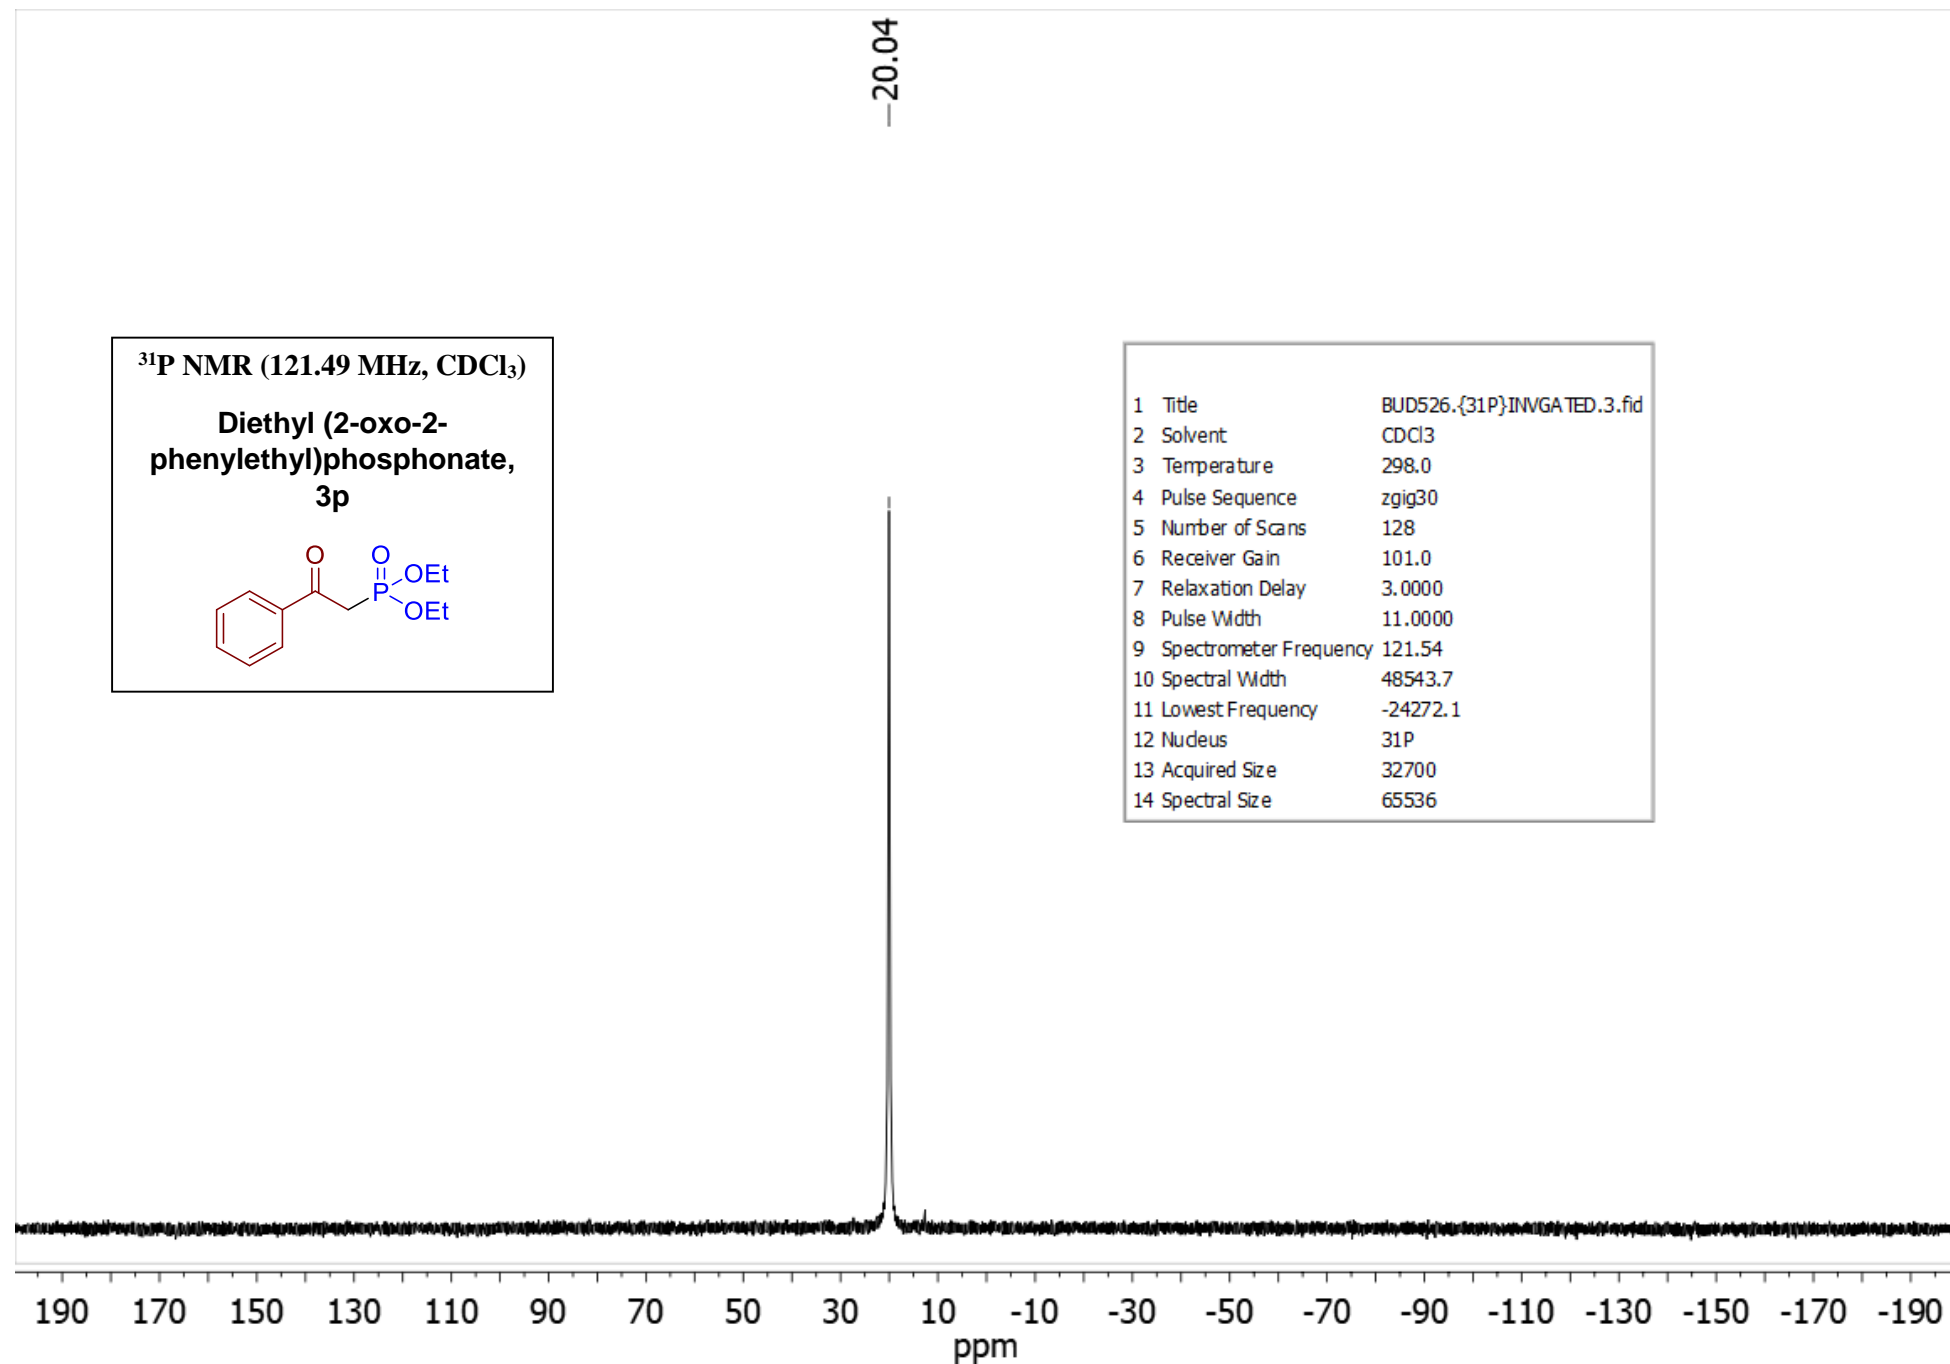

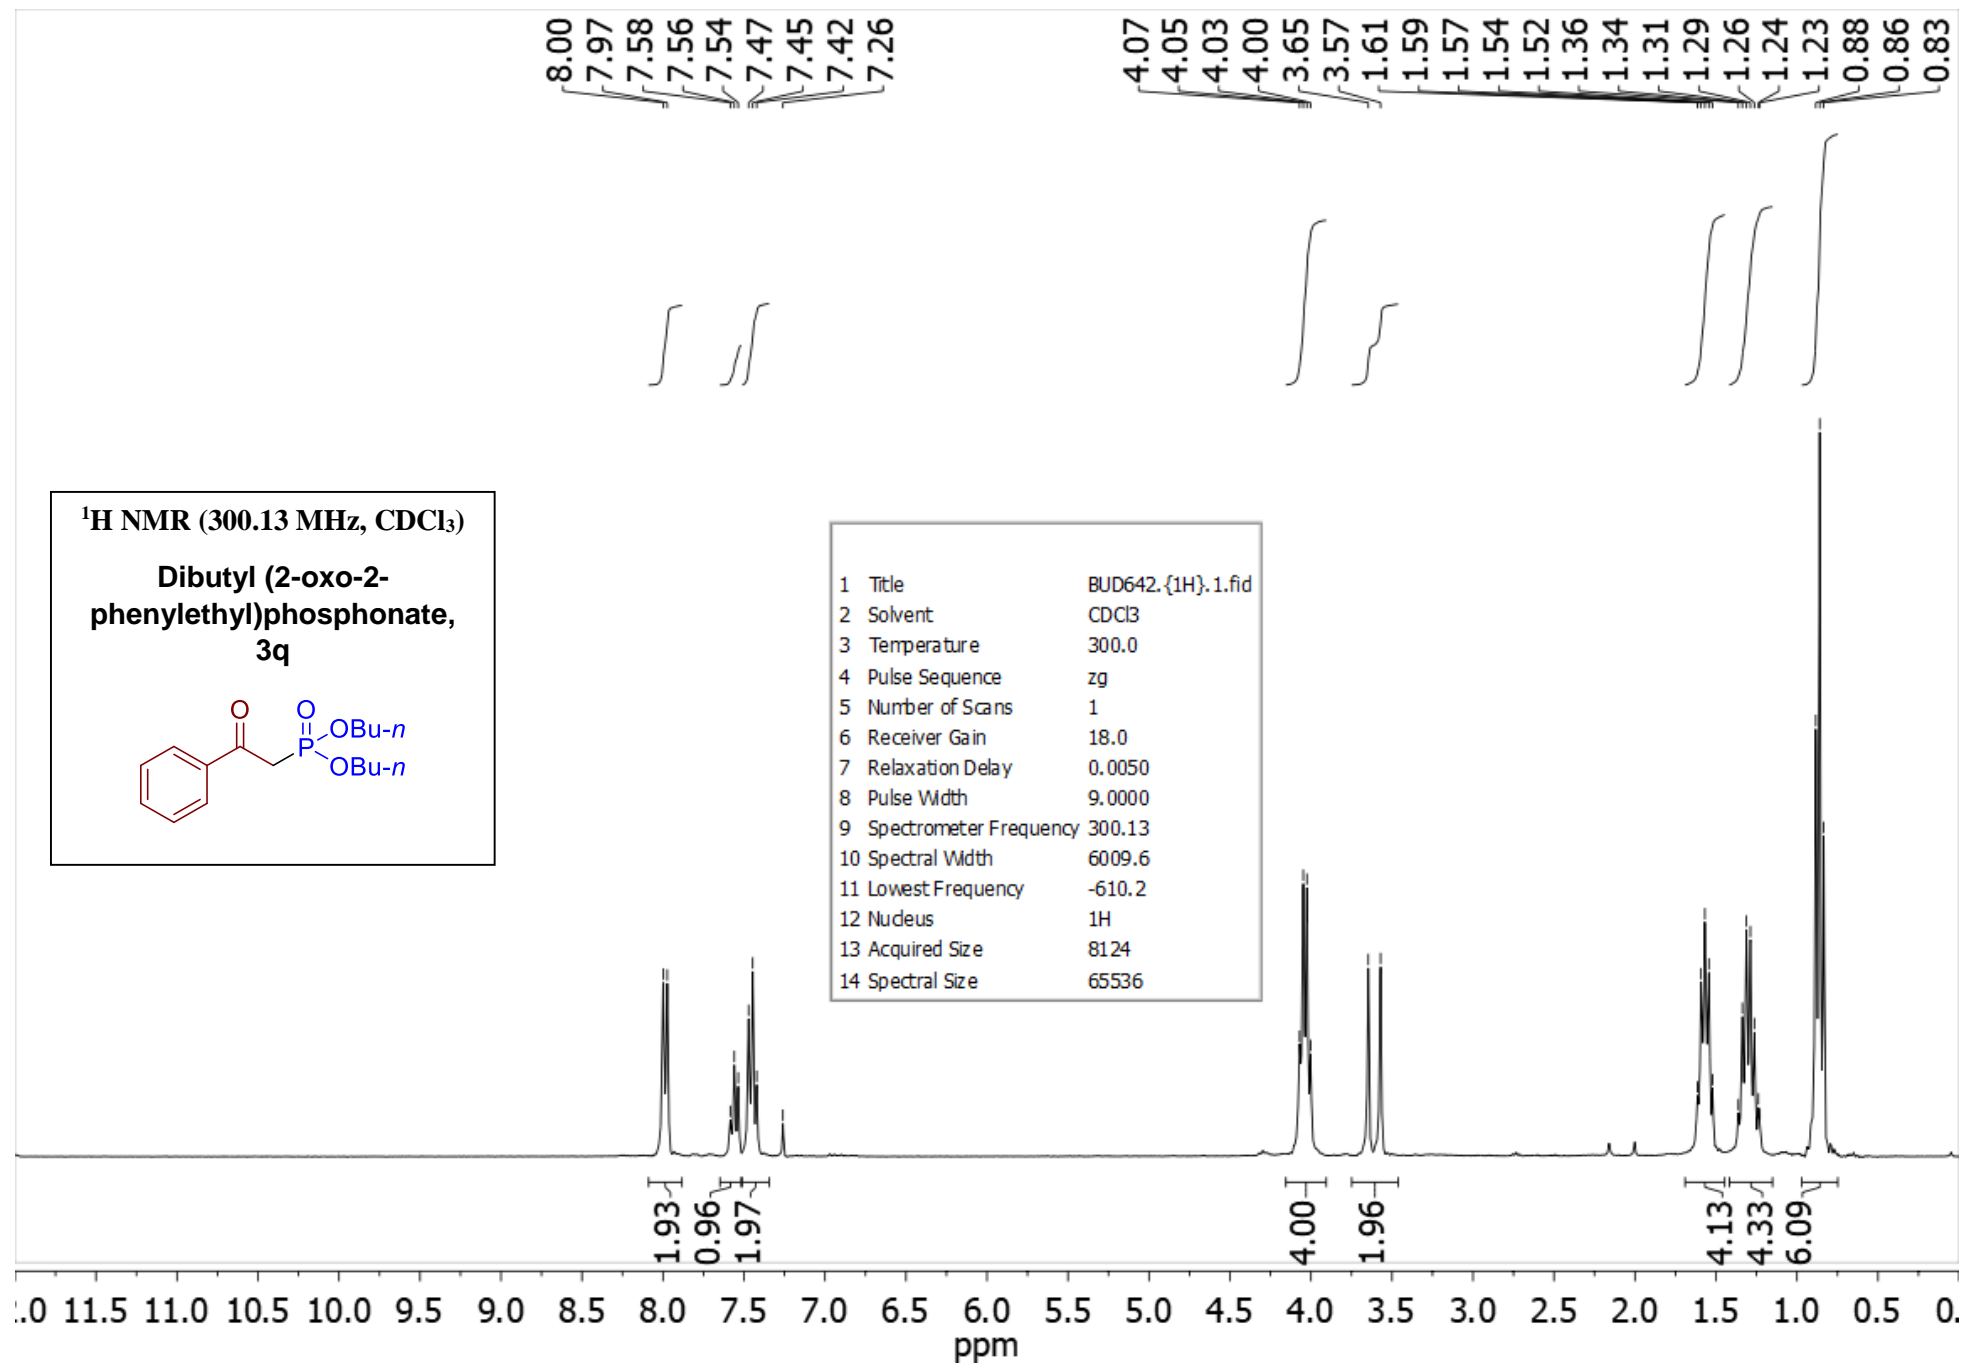

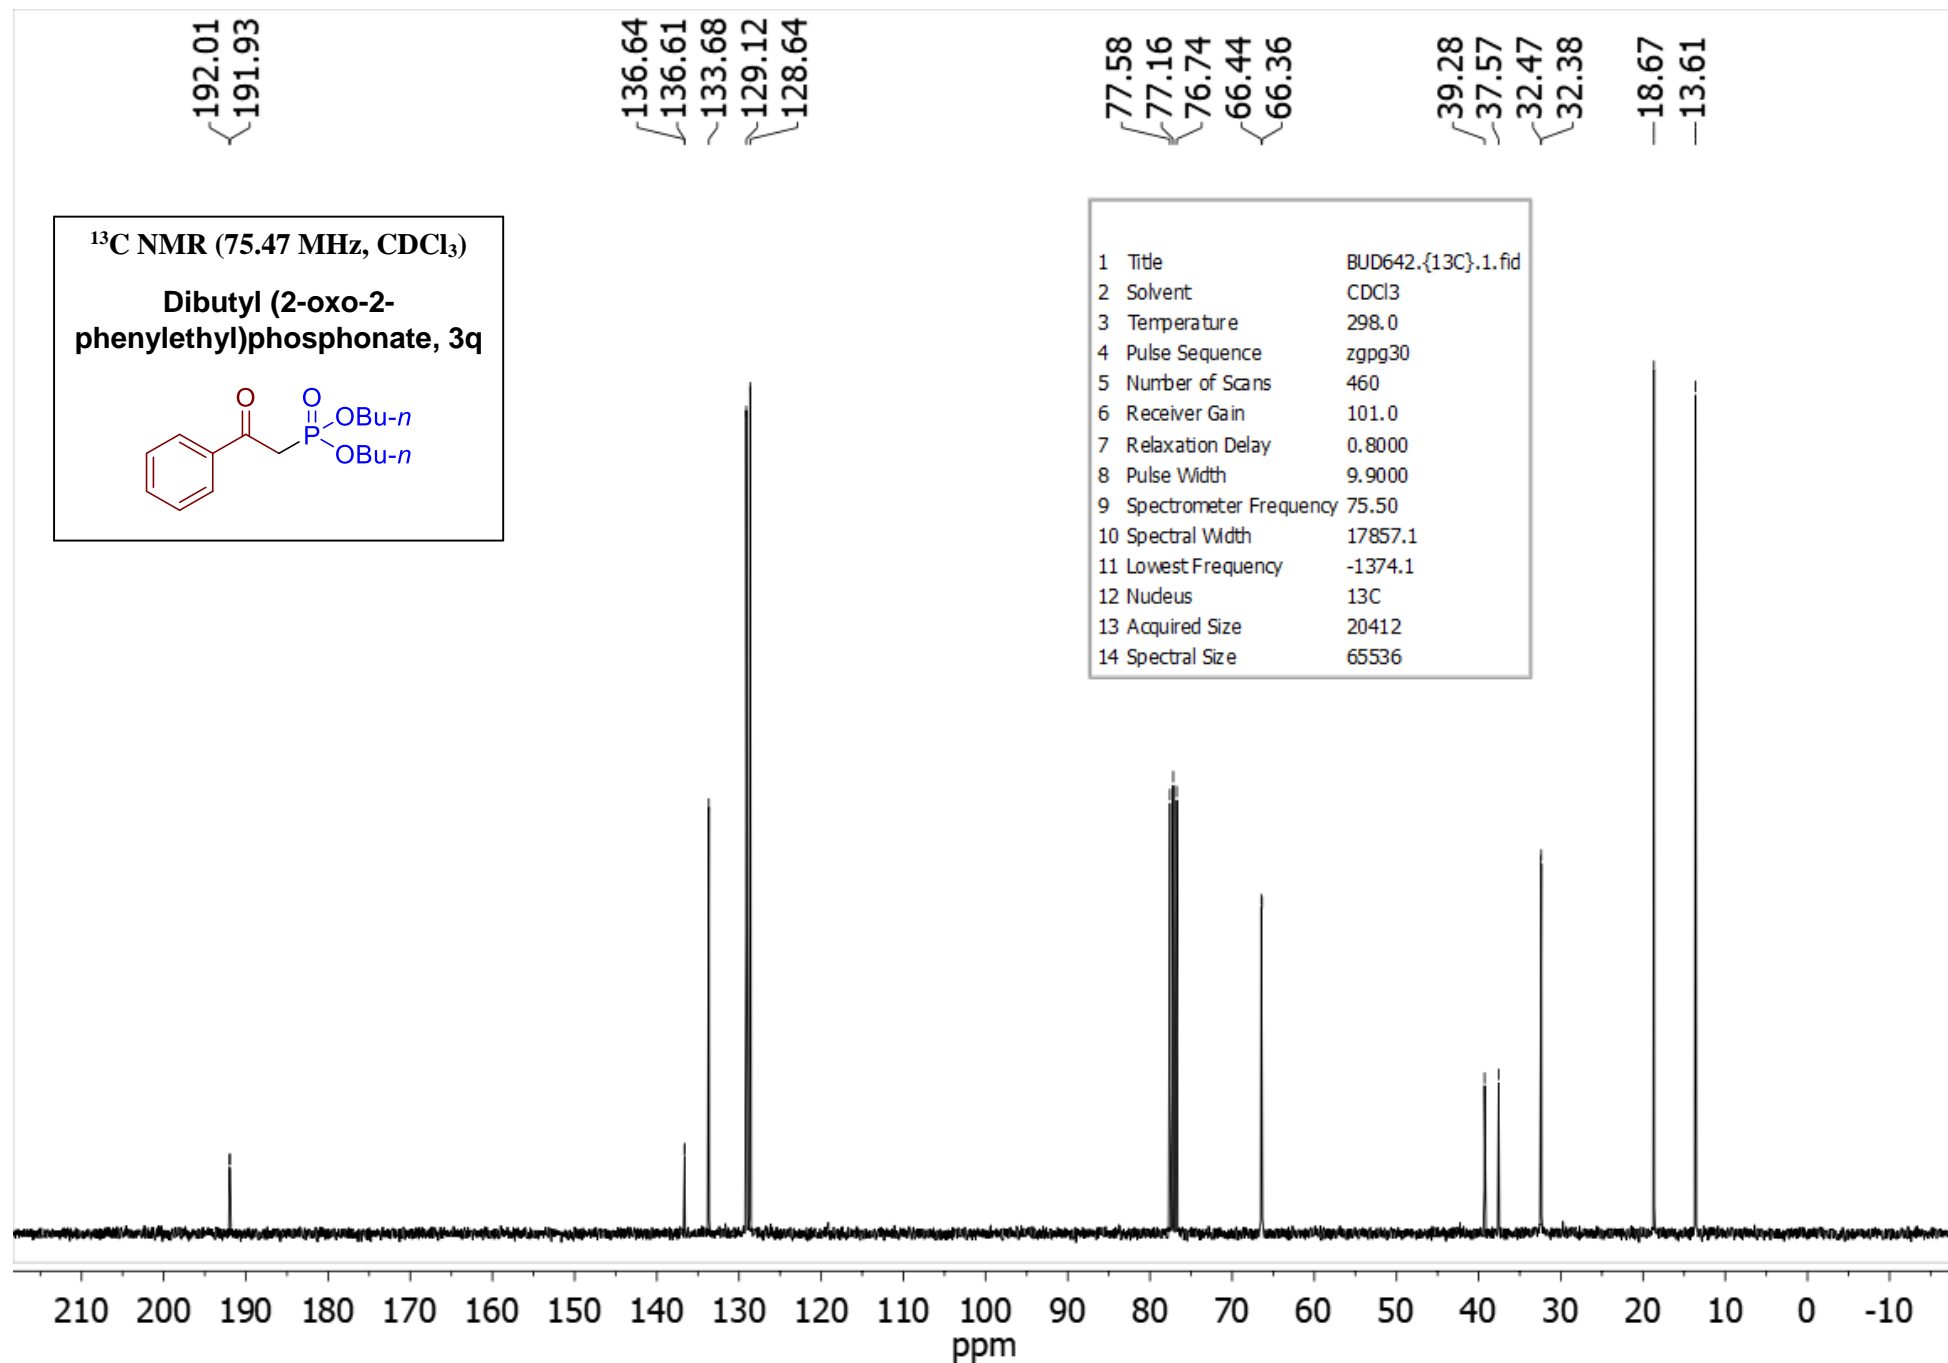



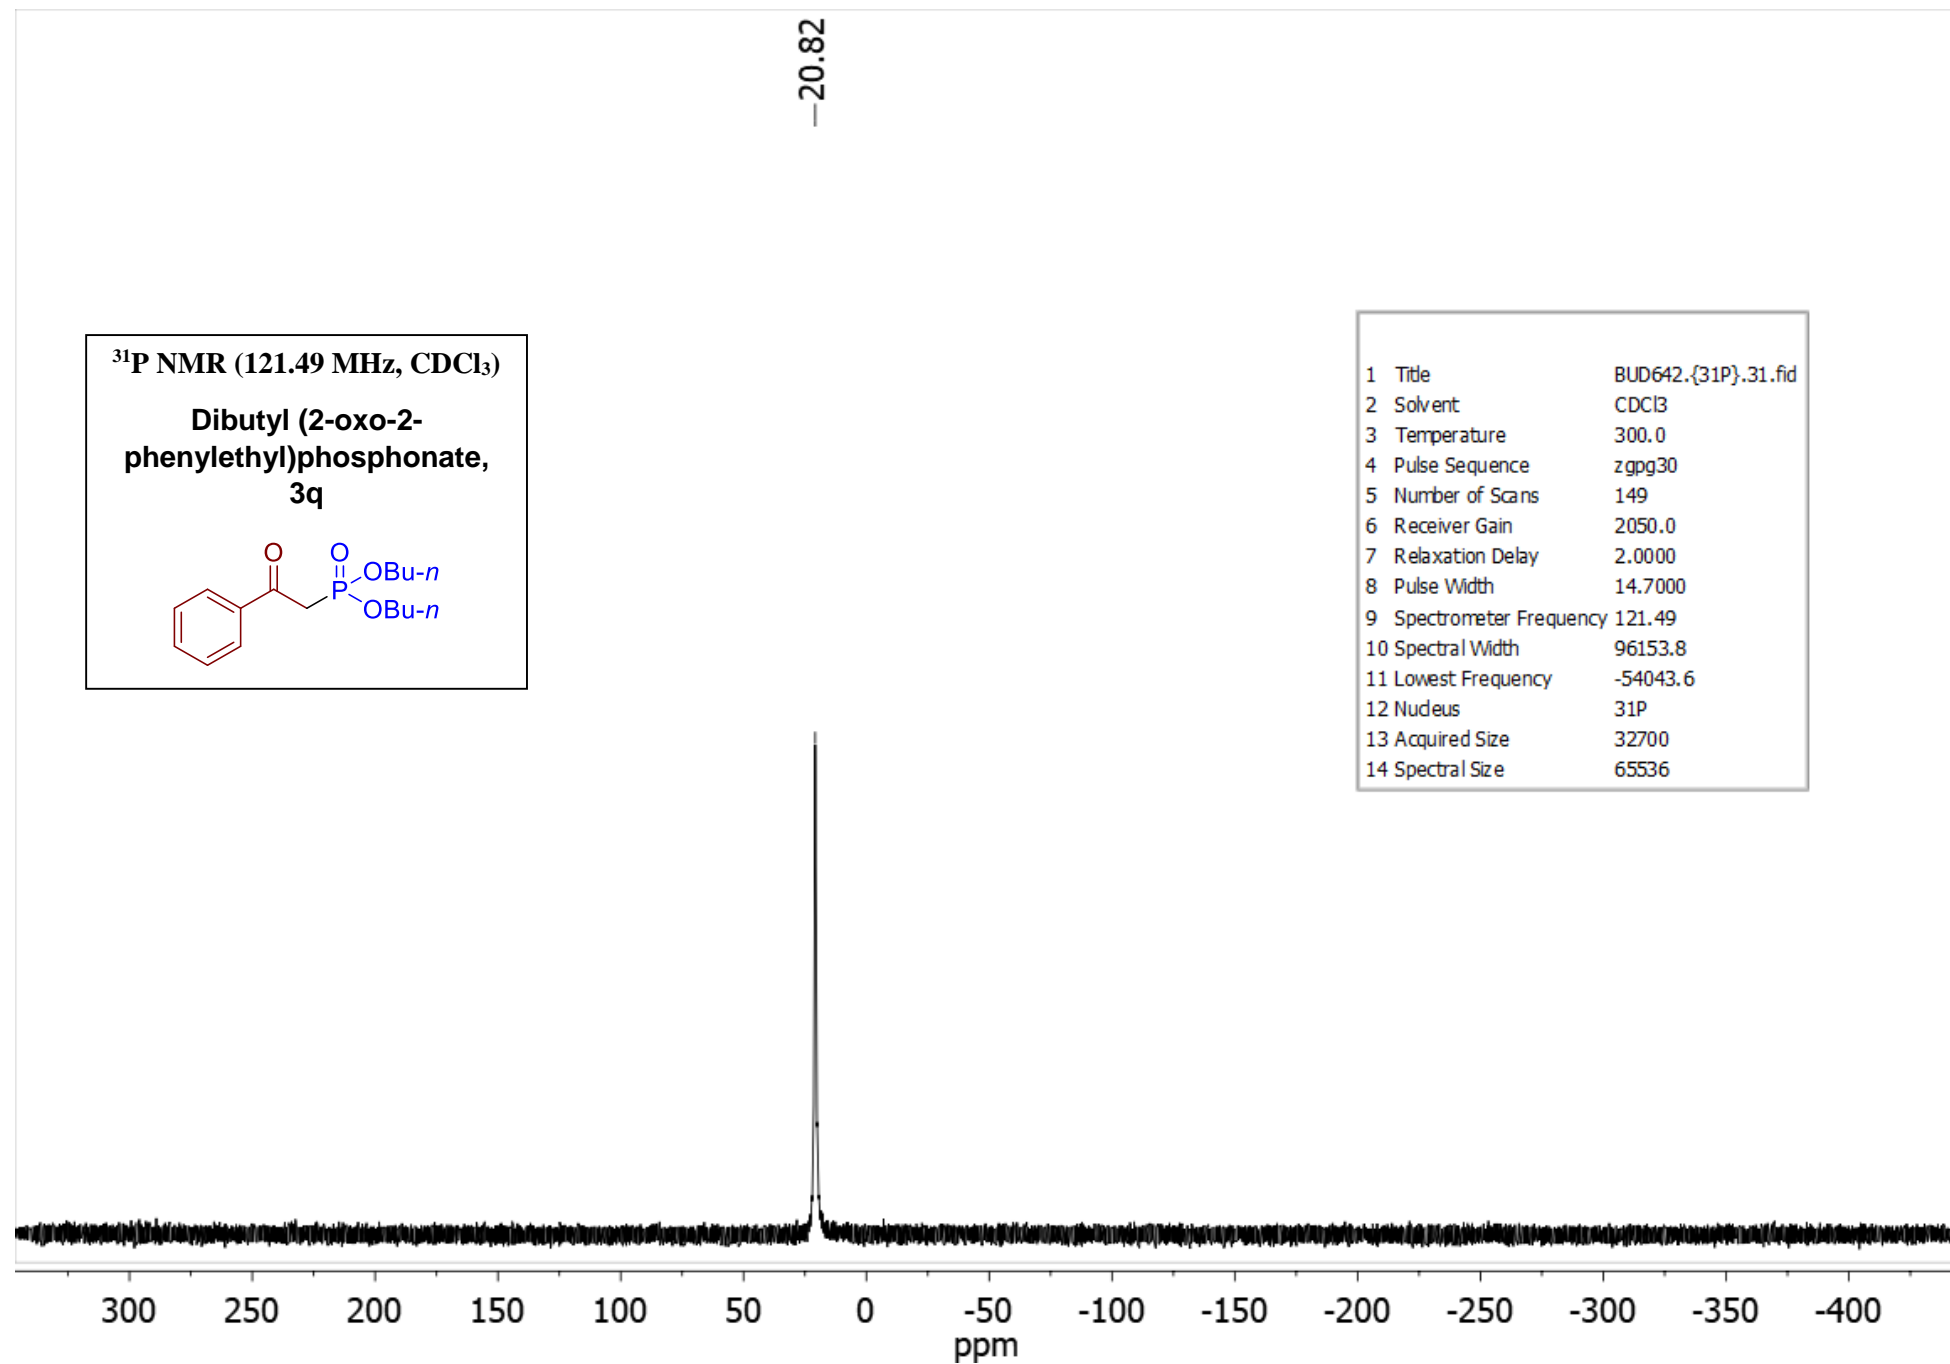

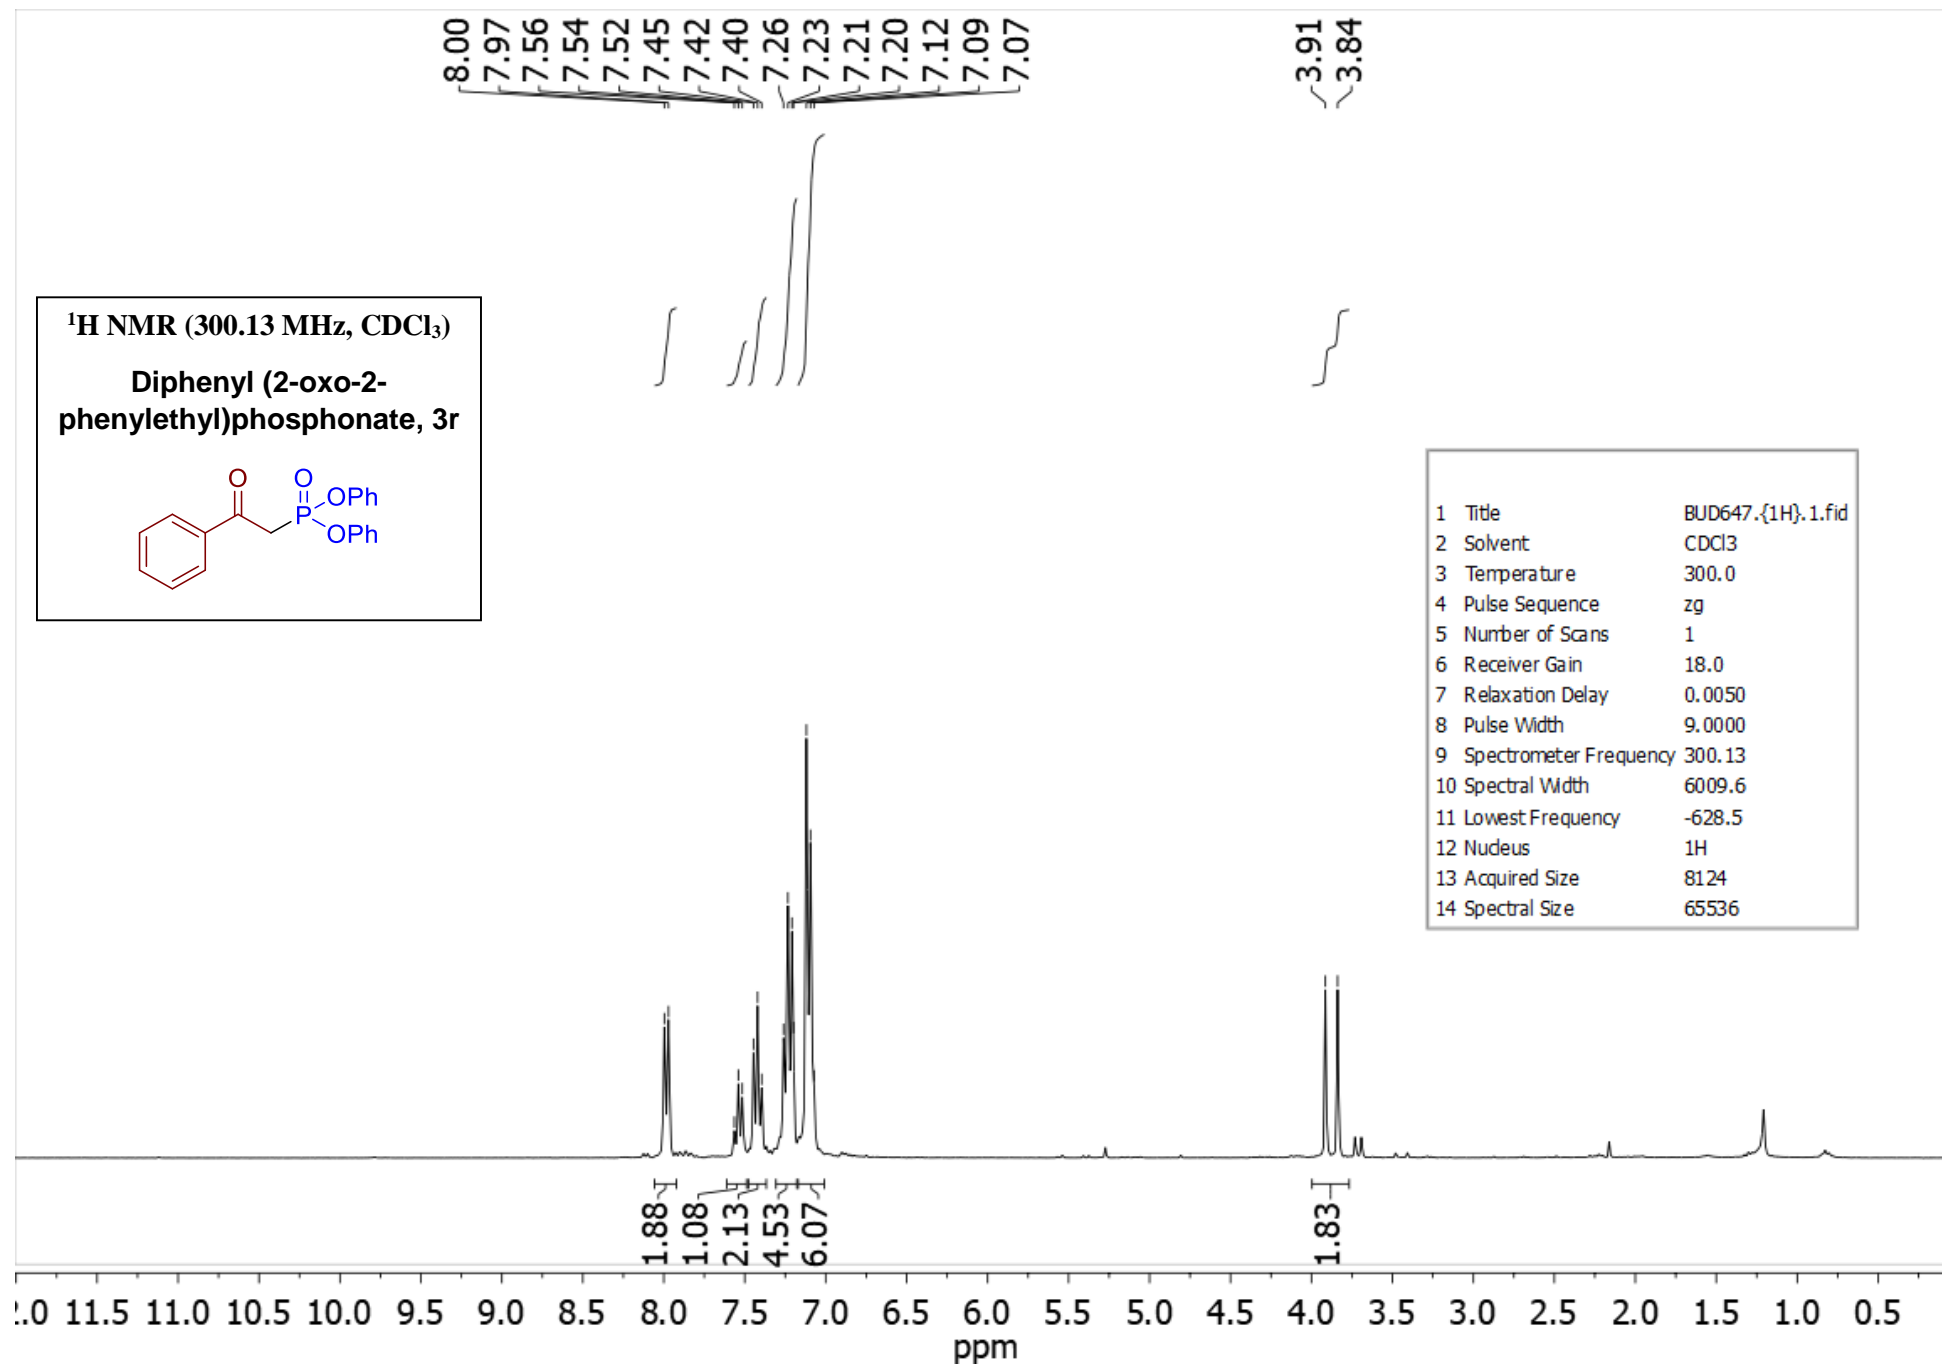

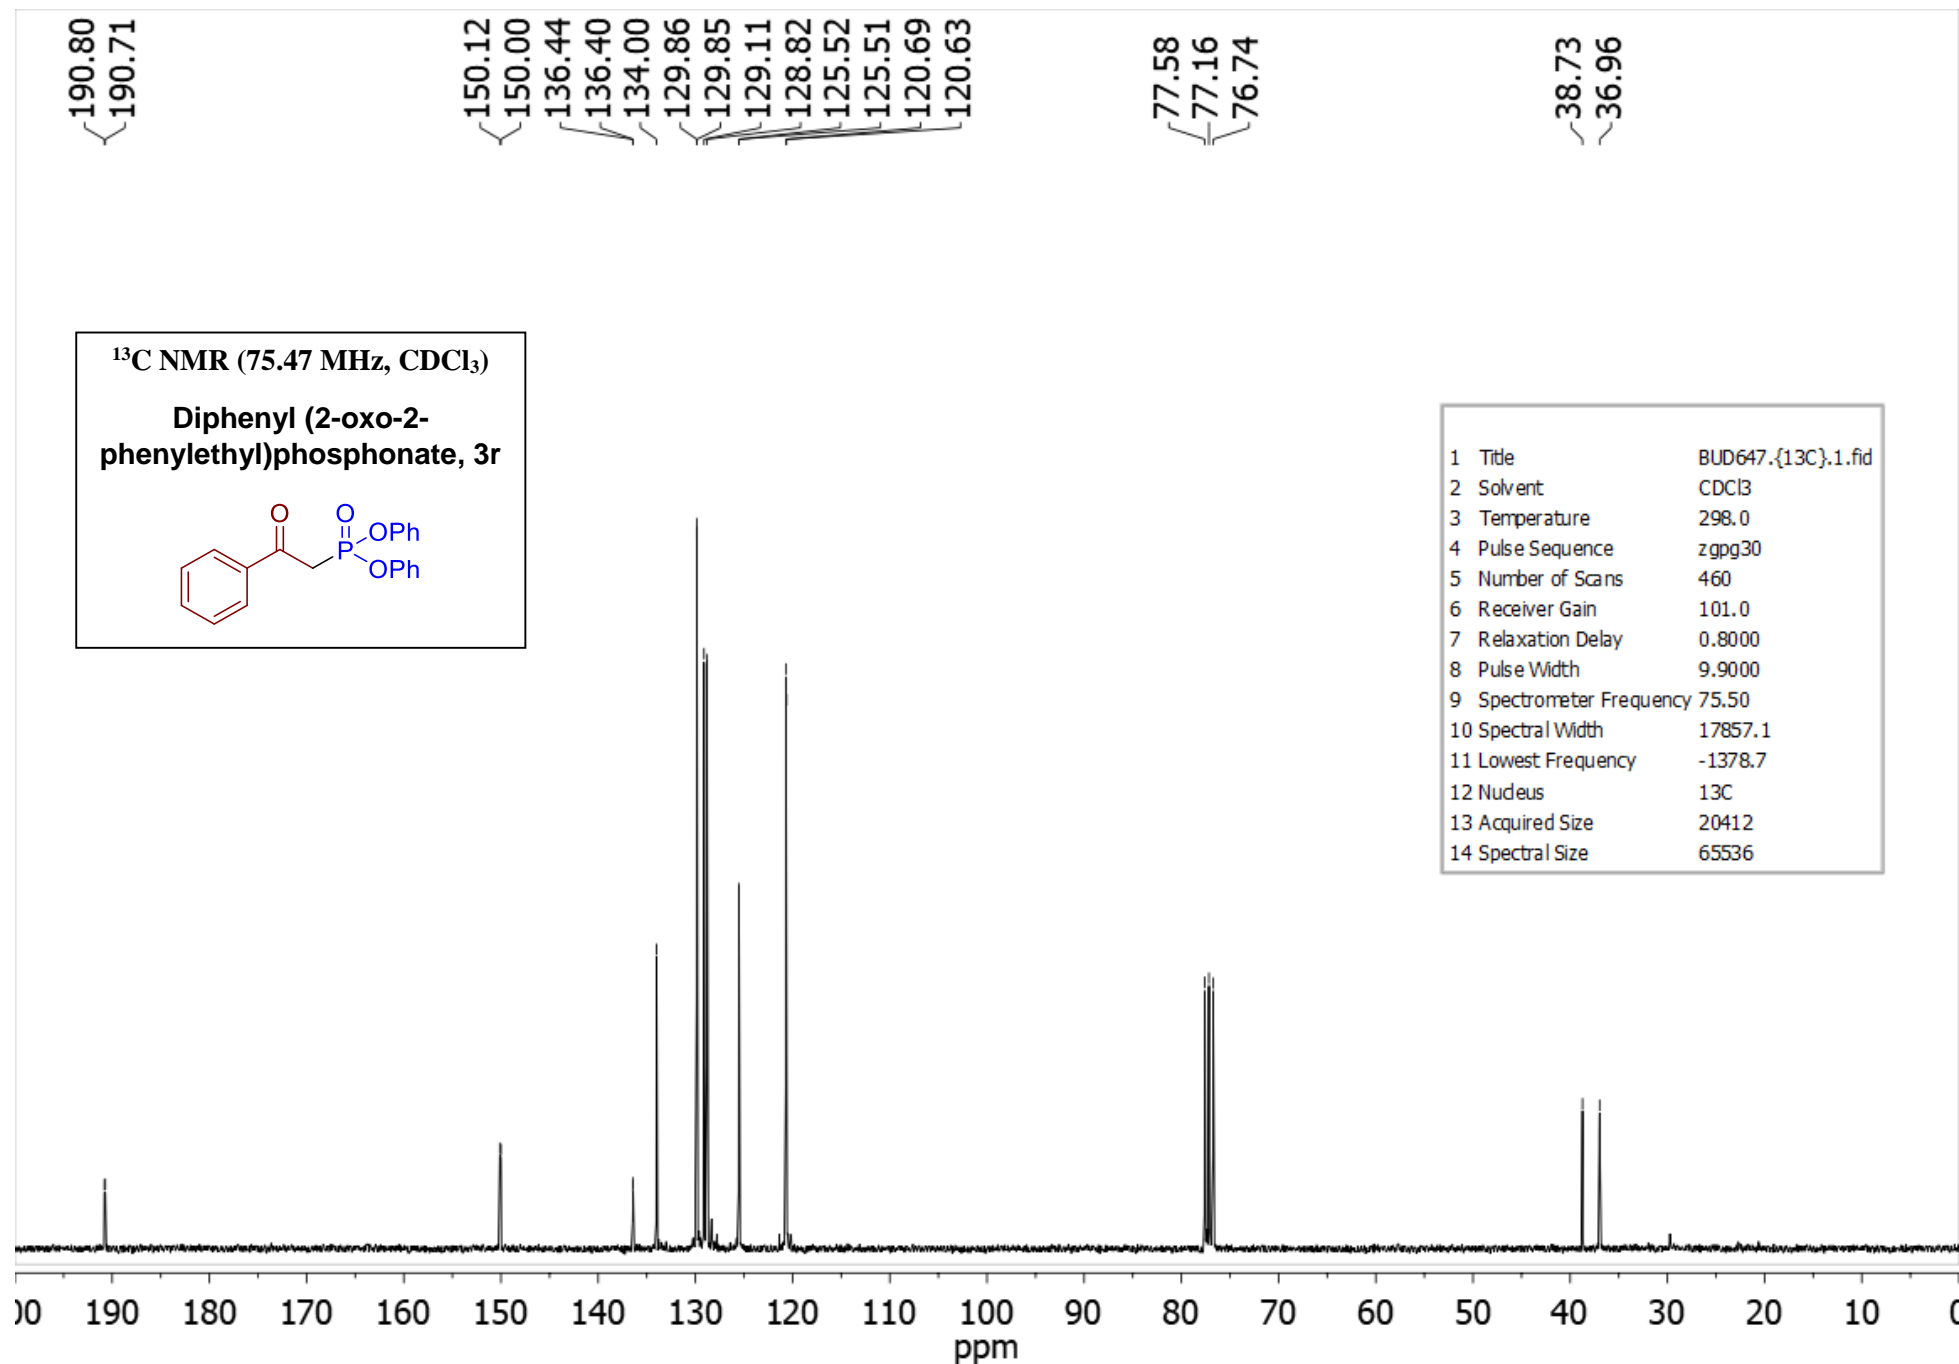

**<sup>31</sup>P NMR (121.49 MHz, CDCl<sub>3</sub>)**

**Diphenyl (2-oxo-2-phenylethyl)phosphonate,  
3r**

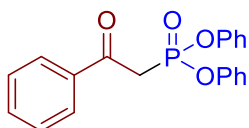

—13.18

|    |                        |                            |
|----|------------------------|----------------------------|
| 1  | Title                  | BUD647.{31P}INVGATED.2.fid |
| 2  | Solvent                | CDCl3                      |
| 3  | Temperature            | 298.0                      |
| 4  | Pulse Sequence         | zgig30                     |
| 5  | Number of Scans        | 128                        |
| 6  | Receiver Gain          | 101.0                      |
| 7  | Relaxation Delay       | 3.0000                     |
| 8  | Pulse Width            | 11.0000                    |
| 9  | Spectrometer Frequency | 121.54                     |
| 10 | Spectral Width         | 48543.7                    |
| 11 | Lowest Frequency       | -24272.1                   |
| 12 | Nucleus                | 31P                        |
| 13 | Acquired Size          | 32700                      |
| 14 | Spectral Size          | 65536                      |

190 170 150 130 110 90 70 50 30 10 -10 -30 -50 -70 -90 -110 -130 -150 -170 -190  
ppm

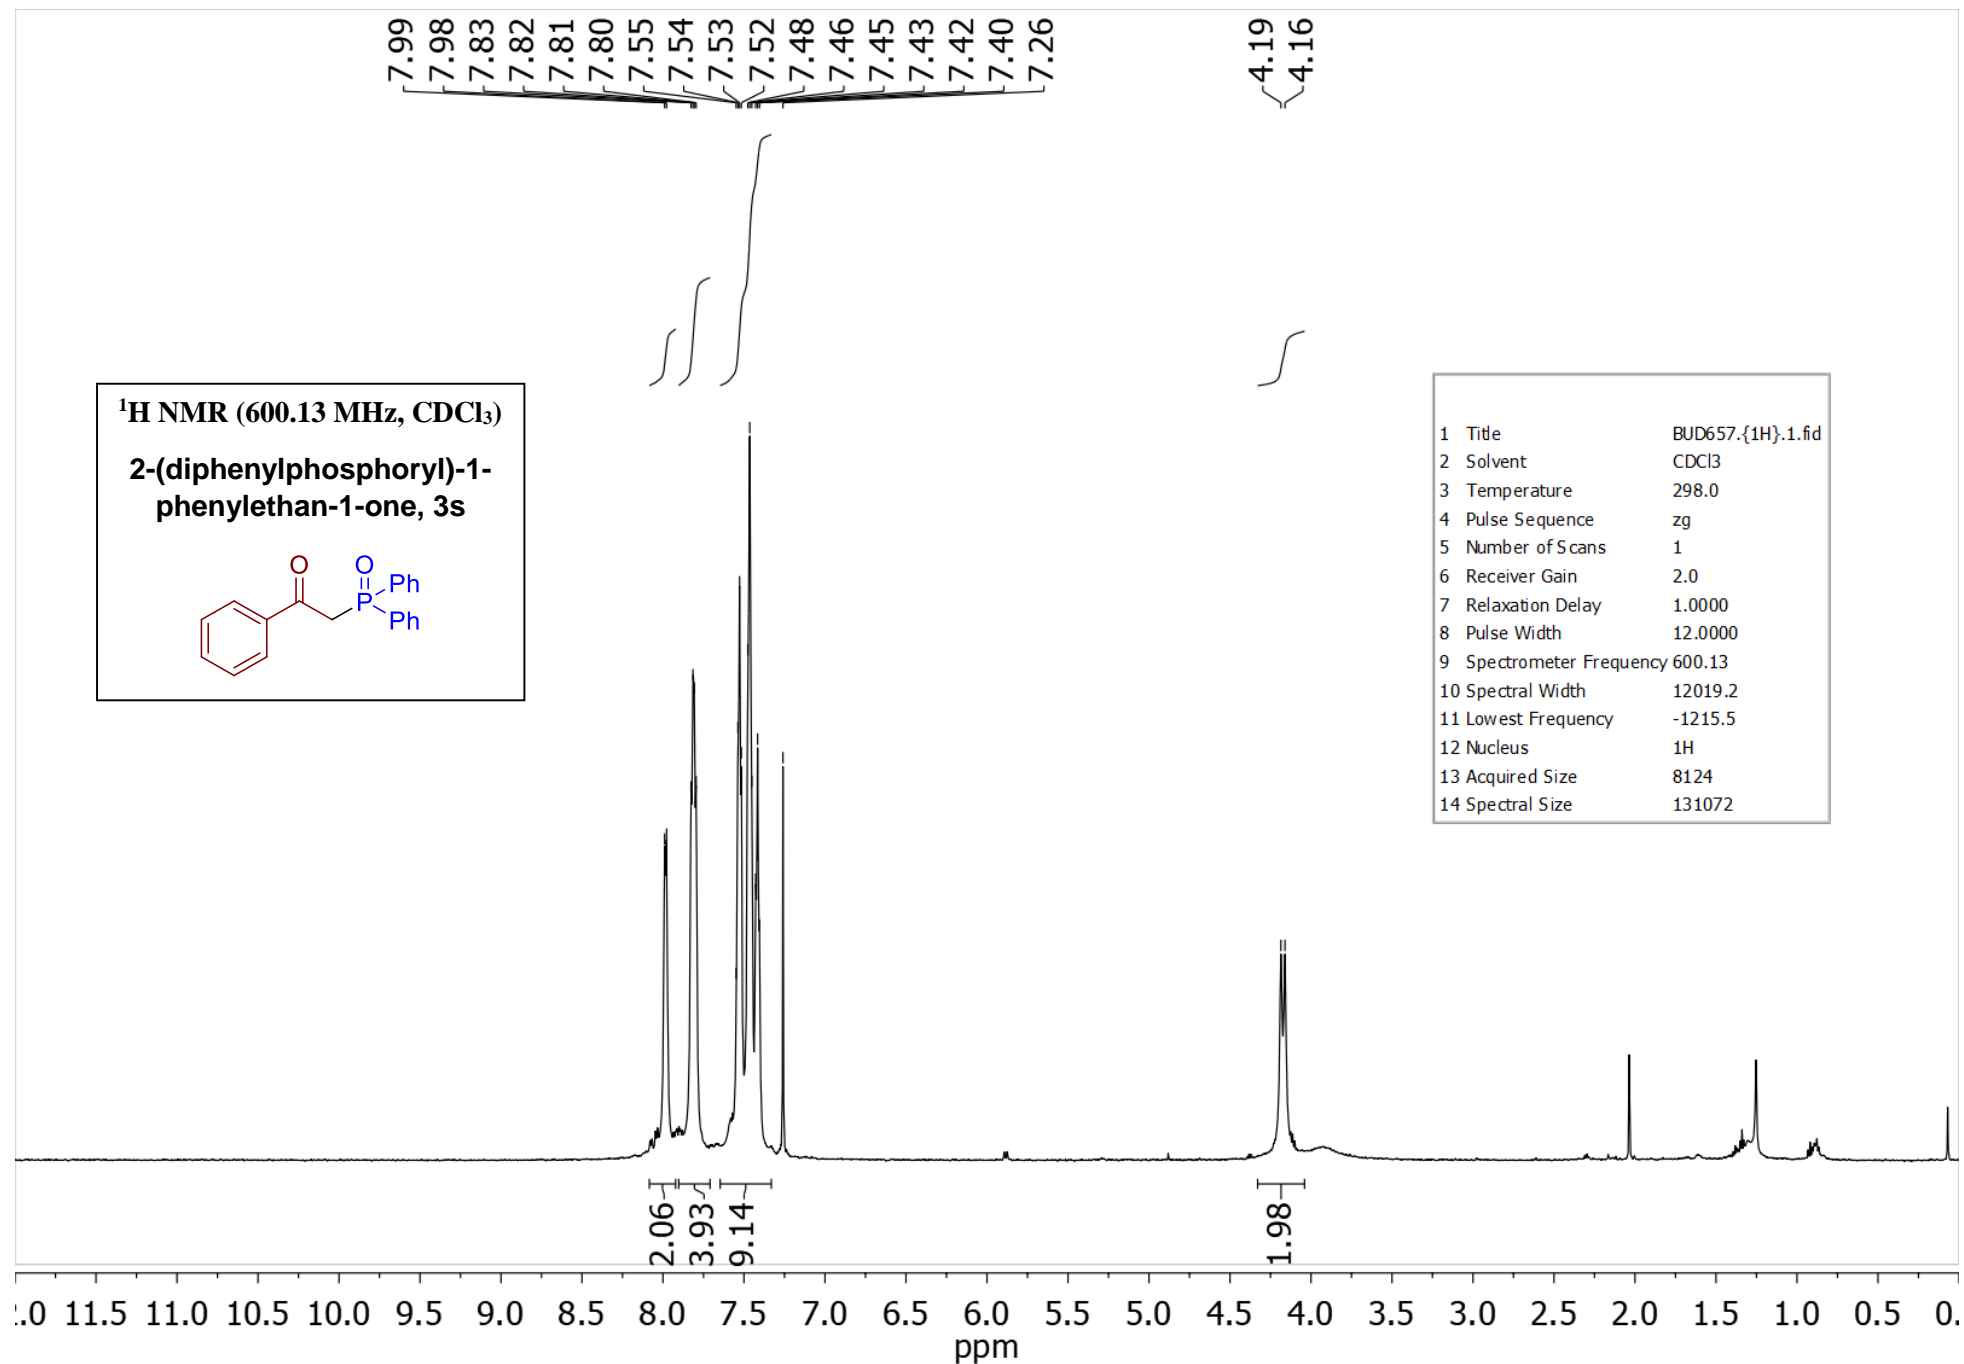

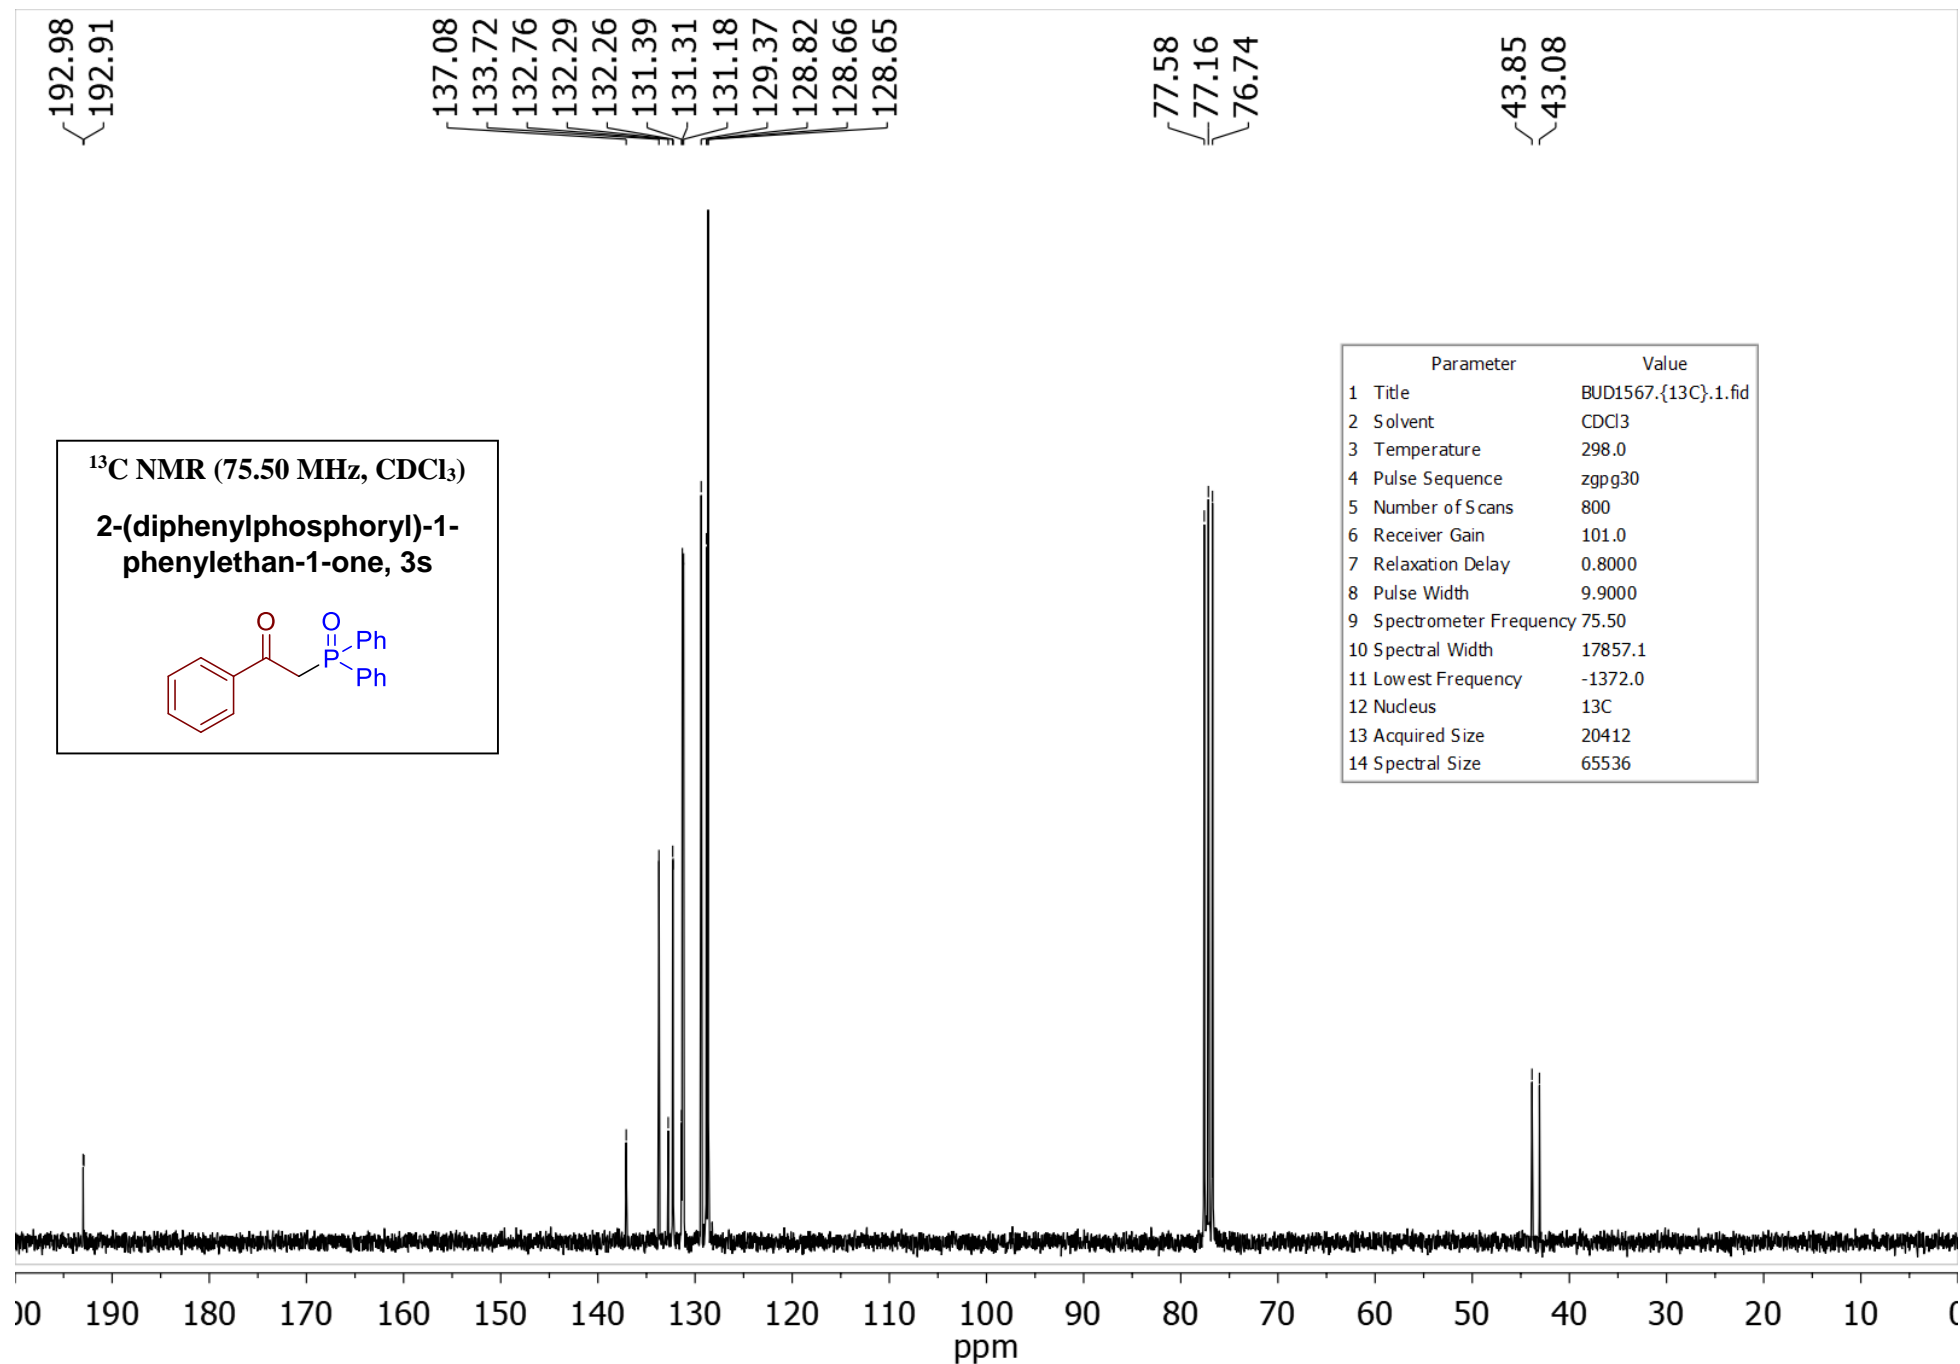

**<sup>31</sup>P NMR (242.93 MHz, CDCl<sub>3</sub>)**

**2-(diphenylphosphoryl)-1-phenylethan-1-one, 3s**

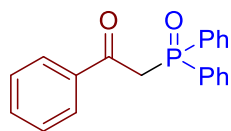

—29.32

|    |                        |                     |
|----|------------------------|---------------------|
| 1  | Title                  | BUD657.{31P}.31.fid |
| 2  | Solvent                | D2O                 |
| 3  | Temperature            | 298.0               |
| 4  | Pulse Sequence         | zgdc                |
| 5  | Number of Scans        | 8                   |
| 6  | Receiver Gain          | 203.0               |
| 7  | Relaxation Delay       | 0.5000              |
| 8  | Pulse Width            | 12.0000             |
| 9  | Spectrometer Frequency | 242.93              |
| 10 | Spectral Width         | 96153.8             |
| 11 | Lowest Frequency       | -51169.0            |
| 12 | Nucleus                | 31P                 |
| 13 | Acquired Size          | 8124                |
| 14 | Spectral Size          | 16384               |

170 150 130 110 90 70 50 30 10 -10 -30 -50 -70 -90 -110 -130 -150 -170 -190 -210  
ppm
